# Supplementary material for: Photocatalytic stereoselective synthesis of amido-substituted (E)-α-trifluoromethyl allylamines via Heck-type alkylation
Source: Royal Society of Chemistry journal article supplement (doi:10.1039/d4ob02102a), 2025-01-01

## Electronic Supplementary Information

# Photocatalytic stereoselective synthesis of amido-substituted (*E*)- $\alpha$ -trifluoromethyl allylamines via Heck-type alkylation

LingLi Liu, Yangjian Cheng, Changduo Pan\* and Jin-Tao Yu\*

*Email: yujintao@cczu.edu.cn; panchangduo@jsut.edu.cn*

### Table of Contents

|                                                                                             |            |
|---------------------------------------------------------------------------------------------|------------|
| <b>1. General Considerations</b>                                                            | <b>S2</b>  |
| <b>2. General Synthetic Procedures</b>                                                      | <b>S2</b>  |
| <b>3. Mechanism Studies</b>                                                                 | <b>S4</b>  |
| <b>4. Characterization Data for the Products</b>                                            | <b>S10</b> |
| <b>5. References</b>                                                                        | <b>S22</b> |
| <b>6. Copies of the <sup>1</sup>H NMR <sup>13</sup>C NMR Spectra and <sup>19</sup>F NMR</b> | <b>S23</b> |

## 1. General Considerations

General Information: Unless otherwise noted, all chemicals were purchased from Energy Chemical or Bidepharmatech and used without further purification. All reactions were monitored by Thin Layer Chromatography (TLC) using silica gel F254 plates. Column chromatography was performed using EM Silica gel 60 (300-400 mesh).  $^1\text{H}$  NMR and  $^{13}\text{C}$  NMR spectra were recorded at ambient temperature on a Bruker-Avance 400 MHz NMR spectrometer (101 MHz for  $^{13}\text{C}$ ). NMR experiments are reported in  $\delta$  units, parts per million (ppm), and were referenced to  $\text{CDCl}_3$  ( $\delta$  7.26 or 77.0) as the internal standard. The coupling constants  $J$  are given in Hz. High-resolution mass spectra (HRMS) were recorded on a TOF LC/MS equipped with electrospray ionization (ESI) probe operating in positive ion mode. Emission intensities were recorded using a FS5 spectrophotometer.

## 2. General Synthetic Procedures

**2.1** All Enamides (**1a-1w**) were prepared according to the previous reports.<sup>[1]</sup>

**2.2** General procedure for the synthesis of Compounds **2b** and **2c**<sup>[2]</sup>

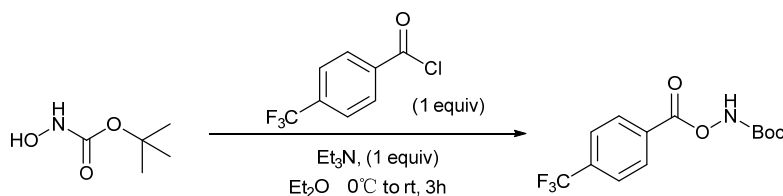

To a stirred suspension of *N*-hydroxycarbamate (1.0 equiv.) in diethyl ether (0.15 M) at 0 °C, triethylamine (1.0 equiv.) was added dropwise over 10 min. 4-(Trifluoromethyl)benzoyl chloride (1.0 equiv.) was added dropwise at the same temperature and subsequently warmed to room temperature and stirred for a further 3 h before quenching by 1.0 M aq. HCl. The phases were separated, and the organic phase was washed sequentially with  $\text{H}_2\text{O}$ , sat. aq.  $\text{NaHCO}_3$ , brine, dried ( $\text{MgSO}_4$ ), filtered and concentrated in vacuo to afford the crude product.

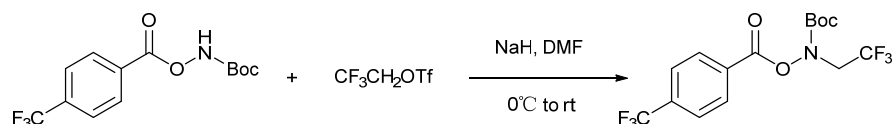

To a solution of *tert*-butyl (benzoyloxy)carbamate (10 mmol, 1.0 equiv.) in dry DMF (80 mL) was added NaH (15 mmol, 1.6 equiv, 60% dispersion in mineral oil) portion wise at 0 °C. The reaction mixture was stirred at 0 °C for 30 minutes and 2,2,2-trifluoroethyl trifluoromethanesulfonate (12 mmol, 1.5 equiv.) was added drop wise at 0 °C. The reaction mixture was allowed to warm to room temperature and

stirred for 30 minutes. After completion of the reaction (monitored by TLC), the reaction mixture was quenched by H<sub>2</sub>O, extracted with CH<sub>2</sub>Cl<sub>2</sub>. The combined organic layers were washed with brine, dried over anhydrous Na<sub>2</sub>SO<sub>4</sub>, and concentrated under reduced pressure. The resulting residue was purified by flash column chromatography on silicagel eluting with a mixture of pentane and EtOAc to give the desired product **2a**.

### 2.3 General procedure for the synthesis of Compounds (3a-3cc)

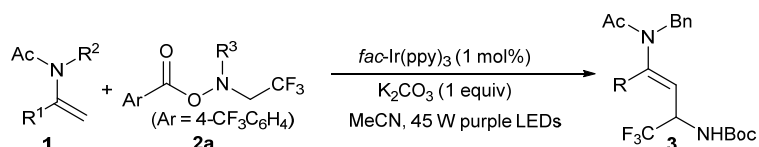

Under N<sub>2</sub>, the mixture of enamides **1** (0.2 mmol), **2a** (0.4 mmol), *fac*-Ir(ppy)<sub>3</sub> (1 mol%, 1.3 mg), K<sub>2</sub>CO<sub>3</sub> (0.2 mmol, 27.6 mg) and CH<sub>3</sub>CN (2 mL) were added to a Schlenk tube and sealed. The mixture was stirred at room temperature under 380-390 nm purple LEDs for 36 hours. Then, the solvent was evaporated under reduced pressure, and the residue was purified by silica gel flash column chromatography to obtain the product **3**.

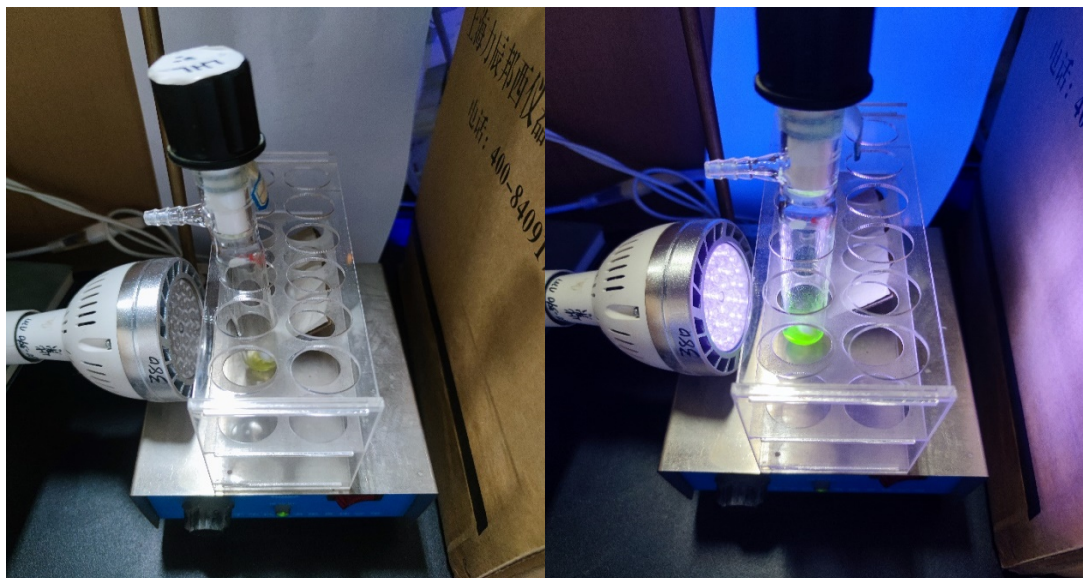

**Figure S1.** Photoreactor used in this work (45 W purple LEDs,  $\lambda_{\text{max}} = 395 \text{ nm}$ ).

#### The Light Source and the Material of the Irradiation Vessel:

The photochemical reaction was carried out under visible light irradiation by a purple LED at room temperature. This 45 W 380-390 nm purple LED was purchased from taobao (link: <https://item.taobao.com/item.htm?id=613485925423&ft=t>). The purple LED's energy peak wavelength is 388 nm, the peak width at half-height is 12.5 nm, and irradiance@45 W is 61.54 mW/cm<sup>2</sup>. The reaction vessel is a borosilicate

glass tube. The distance between the tube and lamp is about 1cm, and no filter is applied.

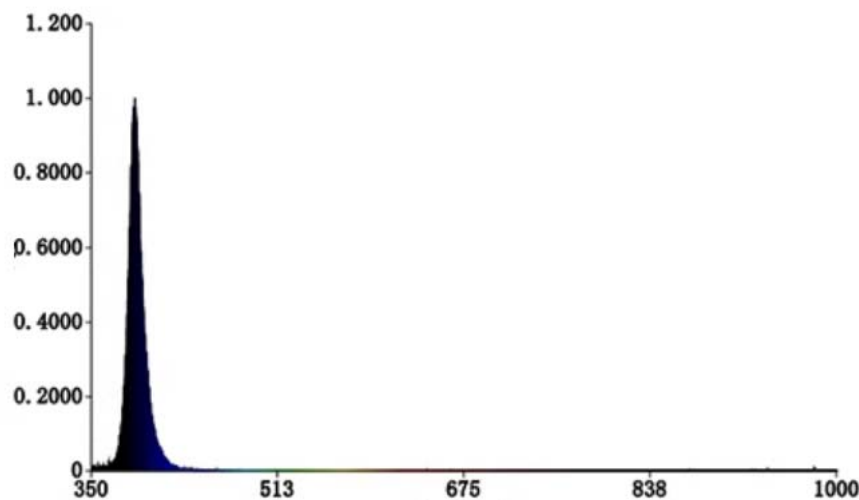

**Figure S2.** The spectral distribution of 45 W 380-390 nm purple LED

## 2.4 Synthetic applications:

### (1) Cleavage of N-Boc Protecting Group

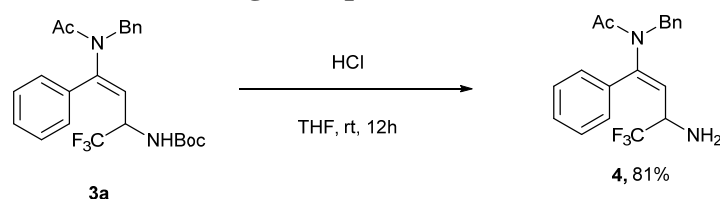

**3a** (44.8 mg, 0.1 mmol) was dissolved in THF (1.0 mL) and concentrated hydrochloric acid (1 mL) was added sequentially. The mixture was stirred at rt for 12 h. Upon completion, the solution was concentrated in vacuum and the product was isolated through flash column chromatography to give **4** as colorless oil (28.2 mg, 81% yield).

### (2) Hydrolysis of **3a**

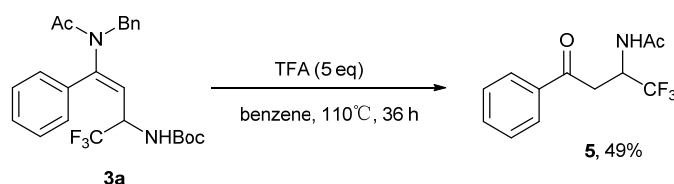

A mixture of **3a** (44.8 mg, 0.1 mmol), trifluoroacetic acid (57.0 mg, 0.5 mmol) in dry benzene (2.0 mL) were stirred at 110 °C for 36 h. Upon completion, the solution was concentrated in vacuum and the product was isolated through flash column chromatography to furnish **5** as colorless oil (12.7 mg, 49% yield).

## 3. Mechanism Studies

### 3.1 Radical inhibiting experiments

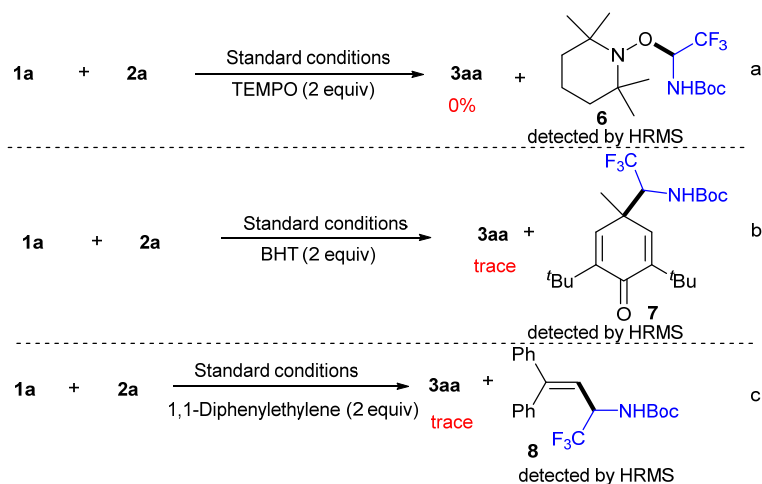

Under standard conditions, radical inhibitor TEMPO (0.4 mmol, 62.5 mg, 2 equiv), BHT (0.4 mmol, 88.1 mg, 2 equiv) or 1,1-diphenylethylene (0.4 mmol, 36.1 mg, 2 equiv) was added, the mixture was stirred at room temperature under 380-390 nm purple LEDs for 36 hours. Then, the mixture was detected by HRMS.

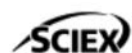

SCIEX OS version: 3.0.0.3339  
Workstation ID: DESKTOP-SI1BP16

Printed by: DESKTOP-SI1BP16/CZHG  
Printed on: 9/15/2024 3:16:31 PM

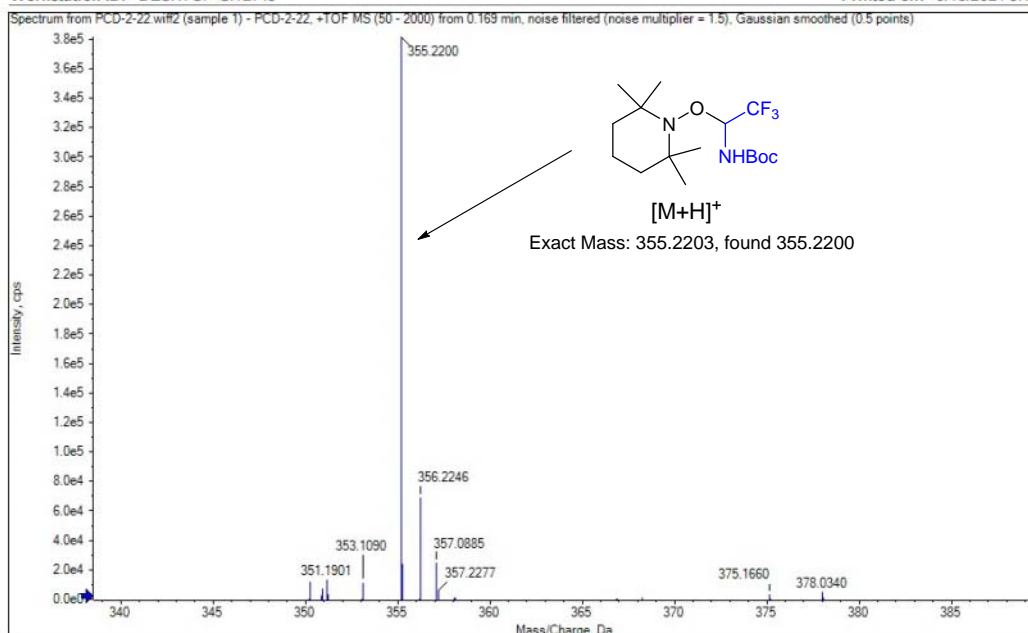

**Figure S3.** The HRMS spectrum for the radical-trapping experiment with TEMPO.

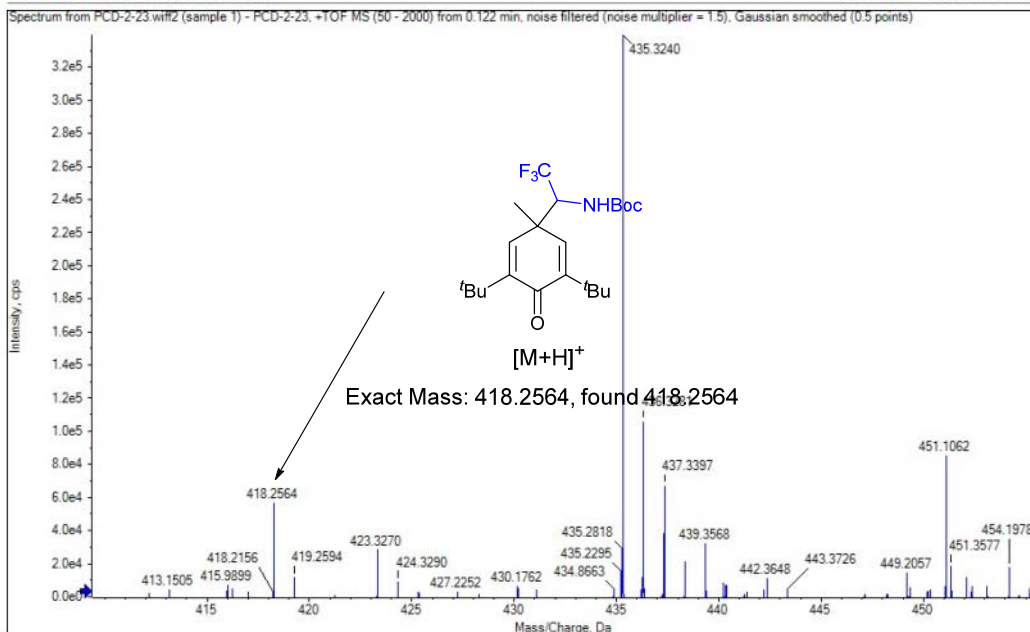

Figure S4. The HRMS spectrum for the radical-trapping experiment with BHT.

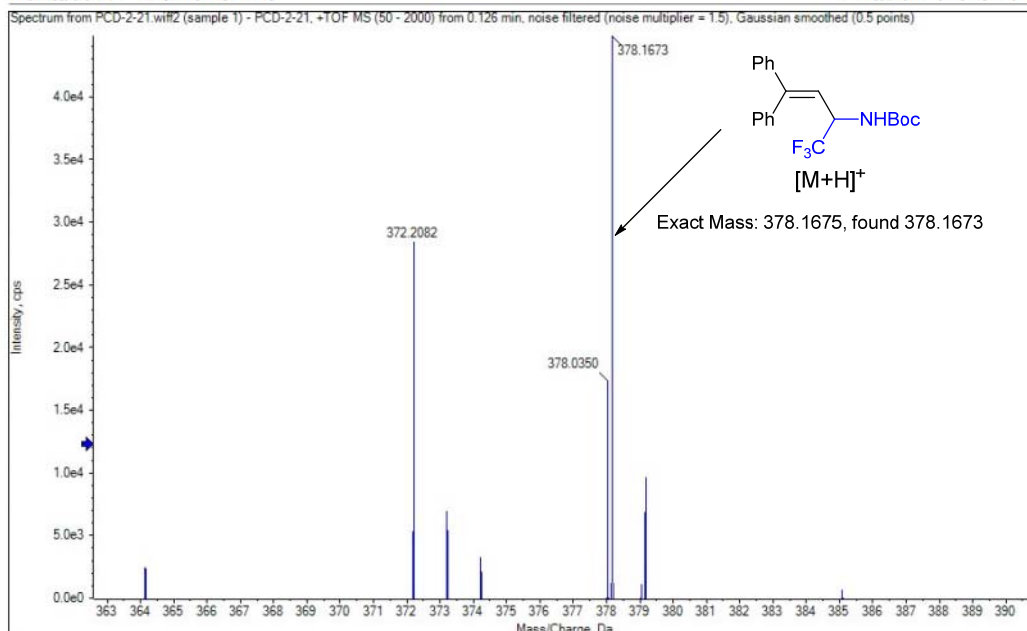

Figure S5. The HRMS spectrum for the radical-trapping experiment with 1,1-diphenylethylene.

### 3.2 Fluorescence quenching experiments

Fluorescence quenching experiments were measured on an FS5

spectrophotometer with a 4 mL quartz cuvette ( $d = 1$  cm) with a cap.  $\text{CH}_3\text{CN}$  was degassed by  $\text{N}_2$  bubbling for 30 minutes before using.  $\text{fac-Ir(ppy)}_3$  was excited at 360 nm and the emission spectrum  $\lambda_{\text{max}} = 520$  nm was recorded. In a typical experiment, the emission spectrum of a  $5 \times 10^{-3}$  M solution of  $\text{fac-Ir(ppy)}_3$  with different concentrations of quencher in degassed  $\text{CH}_3\text{CN}$  in 10 mm path length quartz cuvette was collected after degassing with a stream of  $\text{N}_2$  for 5 minutes. The concentrations of the quencher stock solution were 0 M,  $2.5 \times 10^{-3}$  M,  $4.90 \times 10^{-3}$  M,  $7.4 \times 10^{-3}$  M,  $9.8 \times 10^{-3}$  M,  $1.21 \times 10^{-2}$  M in MeCN, respectively. Linear regression of  $I_0/I$  against concentration is done in Origin 2018 (Figure S6).

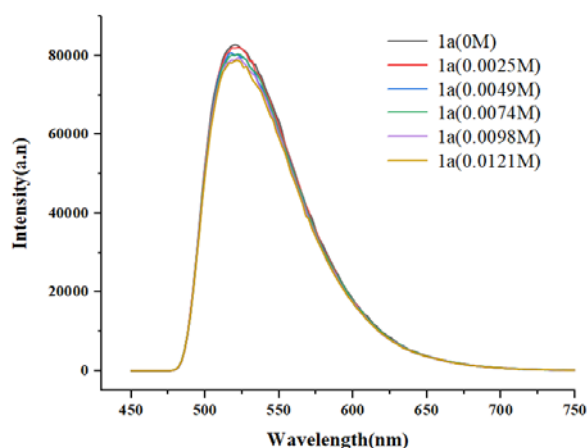

**Figure S6.** Fluorescence quenching of the excited  $\text{fac-Ir(ppy)}_3$  with different concentrations of **1a**.

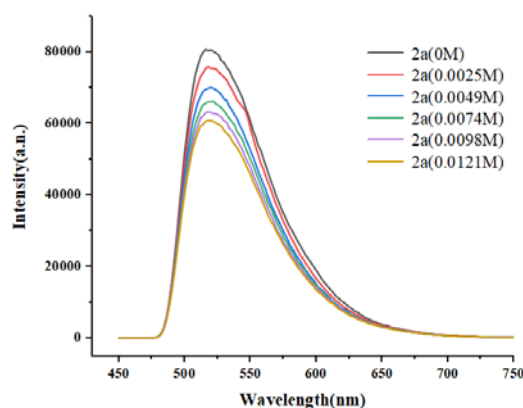

**Figure S7.** Fluorescence quenching of the excited  $\text{fac-Ir(ppy)}_3$  with different concentrations of **2a**.

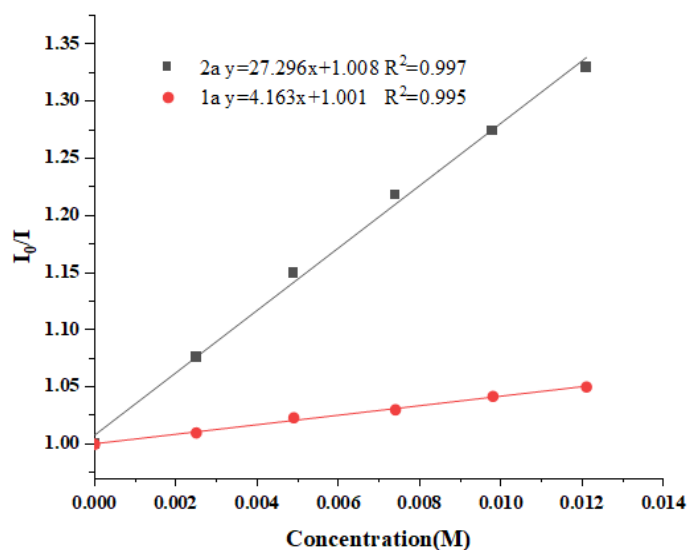

**Figure S8.** Stern-Volmer quenching studies of the excited *fac*-Ir(ppy)<sub>3</sub> with **1a** and **2a**

### 3.3 Intermolecular Kinetic Isotopic Effect (KIE) Study

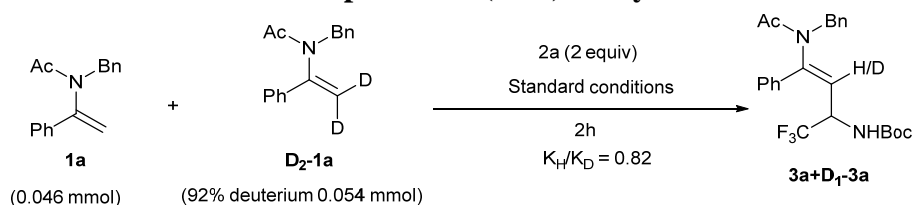

Enamide **D<sub>2</sub>-1a** was prepared according to the literatures,<sup>[3]</sup> as a light yellow oil with 92% deuterium. Under N<sub>2</sub>, the mixture of enamides **1a** (0.046 mmol), enamides **D<sub>2</sub>-1a** (0.054 mmol), **2a** (2 equiv), K<sub>2</sub>CO<sub>3</sub> (1 equiv), *fac*-Ir(ppy)<sub>3</sub> (1 mol%) and MeCN (1 mL) were added to a Schlenk tube and sealed. The mixture was stirred at room temperature under 380-390nm purple LEDs for 2 hours. Then, the solvent was evaporated under reduced pressure, and the residue was purified by silica gel flash column chromatography to obtain product **3a+D<sub>1</sub>-3a** as colorless oil. A KIE value of 0.82 was observed.



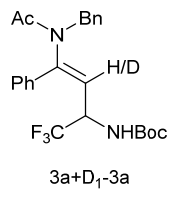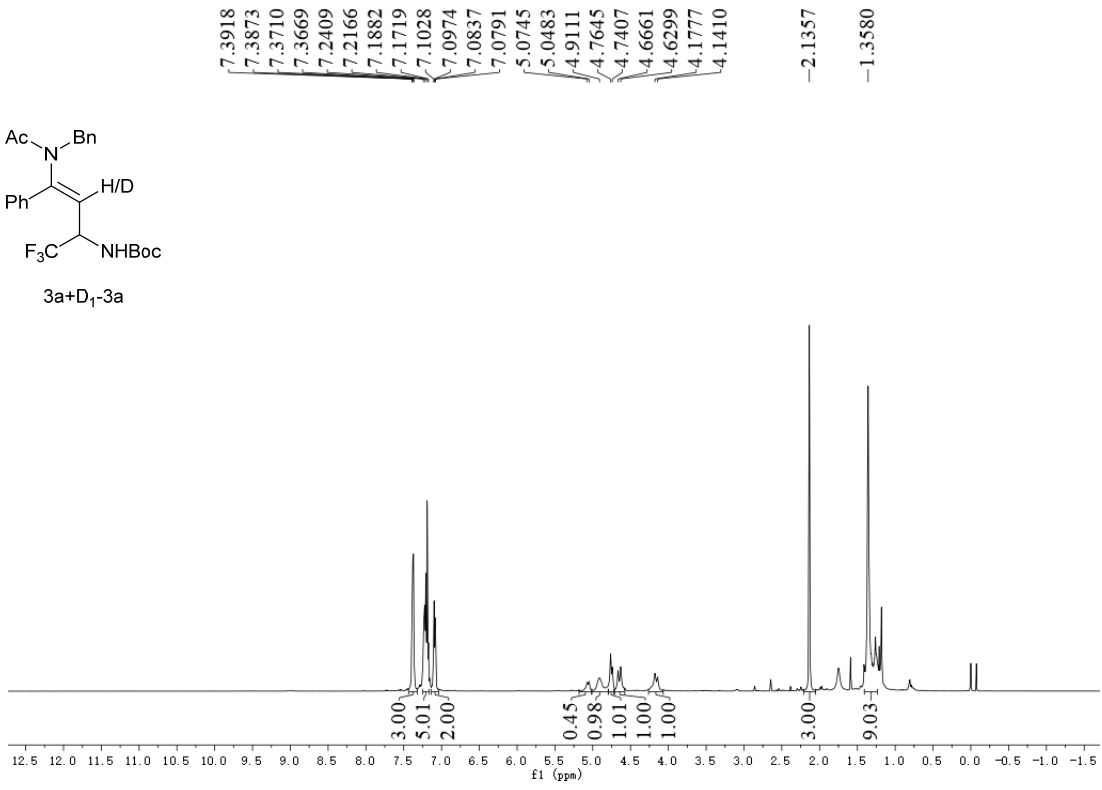

#### 4. Characterization Data for the Products

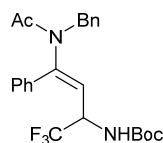

##### Tert-butyl

**(E)-4-(N-benzylacetamido)-1,1,1-trifluoro-4-phenylbut-3-en-2-yl carbamate (3a)**, 71.8 mg, 80%), colorless oil;  $^1\text{H}$  NMR (400 MHz,  $\text{CDCl}_3$ )  $\delta$  7.37 (d,  $J = 6.5$  Hz, 3H), 7.24-7.15 (m, 5H), 7.08 (d,  $J = 7.9$  Hz, 2H), 5.08 (d,  $J = 9.8$  Hz, 1H), 4.98-4.91 (m, 2H), 4.62 (d,  $J = 14.6$  Hz, 1H), 4.21 (d,  $J = 43.3$  Hz, 1H), 2.12 (s, 3H), 1.35 (s, 9H);  $^{13}\text{C}$  NMR (101 MHz,  $\text{CDCl}_3$ )  $\delta$  170.3, 154.0, 146.0, 136.9, 133.2, 130.1, 129.1, 129.0, 128.7, 128.4, 127.5, 124.5 (q,  $J_{\text{C-F}} = 281.8$  Hz), 120.7, 80.8, 51.1 (q,  $J_{\text{C-F}} = 33.3$  Hz), 49.1, 28.2, 22.3;  $^{19}\text{F}$  NMR (282 MHz,  $\text{CDCl}_3$ )  $\delta$  -75.41. HRMS (ESI)  $m/z$  calcd for  $\text{C}_{24}\text{H}_{28}\text{F}_3\text{N}_2\text{O}_3$  [ $\text{M}+\text{H}^+$ ]: 449.2047, found 449.2038.

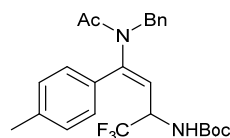

##### Tert-butyl

**(E)-4-(N-benzylacetamido)-1,1,1-trifluoro-4-(p-tolyl)but-3-en-2-yl carbamate (3b)**, 65.7 mg, 71%), colorless oil;  $^1\text{H}$  NMR (400 MHz,  $\text{CDCl}_3$ )  $\delta$  7.20-7.14 (m, 5H), 7.11-7.07 (m, 4H), 5.18-4.78 (m, 3H), 4.61 (d,  $J = 14.5$  Hz, 1H), 4.16 (d, 1H), 2.31 (s, 3H), 2.10 (s, 3H), 1.34 (s, 9H);  $^{13}\text{C}$  NMR (101 MHz,  $\text{CDCl}_3$ )  $\delta$  170.4, 154.1, 146.0, 140.2, 137.0, 130.1, 129.8, 129.0, 128.5, 128.3, 127.4, 124.5 (q,  $J_{\text{C-F}} = 283.5$  Hz), 120.1, 80.7, 51.1 (q,  $J_{\text{C-F}} = 31.9$  Hz), 49.0 (q,  $J_{\text{C-F}} = 11.3$  Hz), 28.1, 22.3, 21.4;  $^{19}\text{F}$  NMR (282 MHz,  $\text{CDCl}_3$ )  $\delta$  -75.47. HRMS (ESI)  $m/z$  calcd for  $\text{C}_{25}\text{H}_{30}\text{F}_3\text{N}_2\text{O}_3$  [ $\text{M}+\text{H}^+$ ]: 463.2203, found 463.2200.

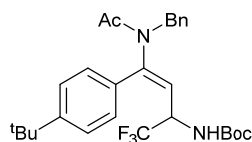

##### Tert-butyl

**(E)-4-(N-benzylacetamido)-4-(4-(tert-butyl)phenyl)-1,1,1-trifluorobut-3-en-2-yl carbamate (3c)**, 91.8 mg, 91%), colorless oil;  $^1\text{H}$  NMR (400 MHz,  $\text{CDCl}_3$ )  $\delta$  7.37 (d,  $J = 8.0$  Hz, 2H), 7.17 (d,  $J = 7.2$  Hz, 4H), 7.09 (d,  $J = 7.8$  Hz, 2H), 4.99 (s, 3H), 4.62 (d,  $J = 14.4$  Hz, 1H), 4.15 (d,  $J = 14.4$  Hz, 1H), 2.10 (s, 3H), 1.36 (s, 9H), 1.27 (s, 9H);

$^{13}\text{C}$  NMR (101 MHz,  $\text{CDCl}_3$ )  $\delta$  170.4, 154.1, 153.2, 145.8, 137.0, 129.1, 128.4, 128.3, 127.4, 126.1, 124.5 (q,  $J_{\text{C-F}} = 281.5$  Hz), 120.3, 80.8, 51.1 (q,  $J_{\text{C-F}} = 31.9$  Hz), 49.1, 34.8, 31.2, 28.2, 28.17, 22.3;  $^{19}\text{F}$  NMR (282 MHz,  $\text{CDCl}_3$ )  $\delta$  -75.43. HRMS (ESI)  $m/z$  calcd for  $\text{C}_{28}\text{H}_{36}\text{F}_3\text{N}_2\text{O}_3$  [ $\text{M}+\text{H}^+$ ]: 505.2673, found 505.2664.

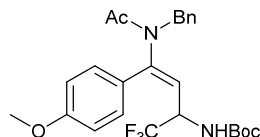

### Tert-butyl

**(E)-4-(N-benzylacetamido)-1,1,1-trifluoro-4-(4-methoxyphenyl)but-3-en-2-yl carbamate (3d)**, 83.3 mg, 87%), colorless oil;  $^1\text{H}$  NMR (400 MHz,  $\text{CDCl}_3$ )  $\delta$  7.16 (t,  $J = 7.3$  Hz, 5H), 7.08 (d,  $J = 7.0$  Hz, 2H), 6.87 (d,  $J = 8.3$  Hz, 2H), 5.12-4.76 (m, 3H), 4.60 (d,  $J = 14.4$  Hz, 1H), 4.19 (d,  $J = 14.6$  Hz, 1H), 3.76 (s, 3H), 2.09 (s, 3H), 1.35 (s, 9H);  $^{13}\text{C}$  NMR (101 MHz,  $\text{CDCl}_3$ )  $\delta$  170.4, 160.8, 154.2, 145.7, 137.0, 130.1, 129.0, 128.3, 127.4, 124.5 (q,  $J_{\text{C-F}} = 280.6$  Hz), 125.2, 119.5, 114.5, 80.7, 55.4, 51.2 (q,  $J_{\text{C-F}} = 31.9$  Hz), 49.0, 28.2, 22.3;  $^{19}\text{F}$  NMR (282 MHz,  $\text{CDCl}_3$ )  $\delta$  -75.44. HRMS (ESI)  $m/z$  calcd for  $\text{C}_{25}\text{H}_{30}\text{F}_3\text{N}_2\text{O}_4$  [ $\text{M}+\text{H}^+$ ]: 479.2152, found 479.2153.

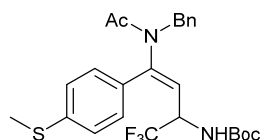

### Tert-butyl

**(E)-4-(N-benzylacetamido)-1,1,1-trifluoro-4-(4-(methylthio)phenyl)but-3-en-2-yl carbamate (3e)**, 81.1 mg, 82%), colorless oil;  $^1\text{H}$  NMR (400 MHz,  $\text{CDCl}_3$ )  $\delta$  7.21-7.12 (m, 7H), 7.08 (d,  $J = 7.6$  Hz, 2H), 5.15-4.76 (m, 3H), 4.61 (d,  $J = 14.4$  Hz, 1H), 4.19 (d,  $J = 14.6$  Hz, 1H), 2.43 (s, 3H), 2.10 (s, 3H), 1.35 (s, 9H);  $^{13}\text{C}$  NMR (101 MHz,  $\text{CDCl}_3$ )  $\delta$  170.4, 154.1, 145.5, 141.6, 136.8, 129.0, 128.4, 127.5, 126.2, 124.5 (q,  $J_{\text{C-F}} = 283.8$  Hz), 120.4, 80.8, 51.1 (q,  $J_{\text{C-F}} = 32.6$  Hz), 49.1, 28.1, 22.3, 15.1;  $^{19}\text{F}$  NMR (282 MHz,  $\text{CDCl}_3$ )  $\delta$  -75.40. HRMS (ESI)  $m/z$  calcd for  $\text{C}_{25}\text{H}_{30}\text{F}_3\text{N}_2\text{O}_3\text{S}$  [ $\text{M}+\text{H}^+$ ]: 495.1924, found 495.1914.

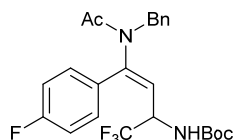

### Tert-butyl

**(E)-4-(N-benzylacetamido)-1,1,1-trifluoro-4-(4-fluorophenyl)but-3-en-2-yl carbamate (3f)**, 71.8 mg, 77%), colorless oil;  $^1\text{H}$  NMR (400 MHz,  $\text{CDCl}_3$ )  $\delta$  7.22-7.14 (m,

5H), 7.04 (t,  $J = 8.1$  Hz, 4H), 5.45-5.09 (m, 2H), 4.90-4.84 (m, 1H), 4.57 (d,  $J = 14.7$  Hz, 1H), 4.20 (d,  $J = 14.5$  Hz, 1H), 2.10 (s, 3H), 1.33 (s, 9H);  $^{13}\text{C}$  NMR (101 MHz,  $\text{CDCl}_3$ )  $\delta$  170.3, 163.5 (d,  $J_{\text{C-F}} = 252.1$  Hz), 154.2, 144.9, 136.7, 130.7 (d,  $J_{\text{C-F}} = 8.5$  Hz), 129.2, 128.9, 128.4, 127.6, 124.4 (q,  $J_{\text{C-F}} = 282.9$  Hz), 120.9, 116.3 (d,  $J_{\text{C-F}} = 21.9$  Hz), 80.9, 51.1 (q,  $J_{\text{C-F}} = 32.1$  Hz), 49.1, 28.1, 22.3;  $^{19}\text{F}$  NMR (282 MHz,  $\text{CDCl}_3$ )  $\delta$  -75.31, -110.05. HRMS (ESI)  $m/z$  calcd for  $\text{C}_{24}\text{H}_{27}\text{F}_4\text{N}_2\text{O}_3$   $[\text{M}+\text{H}^+]$ : 467.1952, found 467.1949.

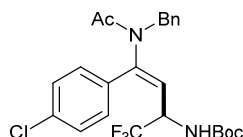

### Tert-butyl

**(E)-4-(N-benzylacetamido)-4-(4-chlorophenyl)-1,1,1-trifluorobut-3-en-2-yl carbamate (3g)**, 68.6 mg, 71%), colorless oil;  $^1\text{H}$  NMR (400 MHz,  $\text{CDCl}_3$ )  $\delta$  7.35 (d,  $J = 8.2$  Hz, 2H), 7.18 (m, 5H), 7.08-7.05 (m, 2H), 5.08 (d,  $J = 9.4$  Hz, 1H), 4.87 (d,  $J = 7.7$  Hz, 2H), 4.61 (d,  $J = 14.5$  Hz, 1H), 4.18 (d,  $J = 14.6$  Hz, 1H), 2.11 (s, 3H), 1.35 (s, 9H);  $^{13}\text{C}$  NMR (101 MHz,  $\text{CDCl}_3$ )  $\delta$  170.2, 154.0, 144.9, 136.6, 136.2, 131.6, 130.0, 129.5, 128.9, 128.4, 127.6, 124.3 (q,  $J_{\text{C-F}} = 283.2$  Hz), 121.2, 81.0, 51.1 (q,  $J_{\text{C-F}} = 32.1$  Hz), 49.0, 28.1, 22.3;  $^{19}\text{F}$  NMR (376 MHz,  $\text{CDCl}_3$ )  $\delta$  -75.29. HRMS (ESI)  $m/z$  calcd for  $\text{C}_{24}\text{H}_{27}\text{ClF}_3\text{N}_2\text{O}_3$   $[\text{M}+\text{H}^+]$ : 483.1657, found 483.1658.

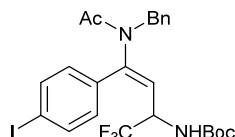

### Tert-butyl

**(E)-4-(N-benzylacetamido)-1,1,1-trifluoro-4-(4-iodophenyl)but-3-en-2-yl carbamate (3h)**, 44.8 mg, 39%), colorless oil;  $^1\text{H}$  NMR (400 MHz,  $\text{CDCl}_3$ )  $\delta$  7.60 (d,  $J = 7.8$  Hz, 2H), 7.08 (d,  $J = 5.3$  Hz, 2H), 6.97-6.95 (m, 2H), 6.85 (d,  $J = 8.1$  Hz, 2H), 4.96 (d,  $J = 10.0$  Hz, 1H), 4.76-4.65 (m, 2H), 4.52 (d,  $J = 14.5$  Hz, 1H), 4.07 (d,  $J = 14.4$  Hz, 1H), 2.00 (s, 3H), 1.24 (s, 9H);  $^{13}\text{C}$  NMR (101 MHz,  $\text{CDCl}_3$ )  $\delta$  170.2, 154.0, 145.1, 138.4, 136.7, 132.7, 130.3, 128.9, 128.4, 127.6, 124.3 (q,  $J_{\text{C-F}} = 283.8$  Hz), 121.3, 96.5, 81.1, 51.1 (q,  $J_{\text{C-F}} = 33.9$  Hz), 49.1, 28.1, 22.3;  $^{19}\text{F}$  NMR (282 MHz,  $\text{CDCl}_3$ )  $\delta$  -75.33. HRMS (ESI)  $m/z$  calcd for  $\text{C}_{24}\text{H}_{27}\text{IF}_3\text{N}_2\text{O}_3$   $[\text{M}+\text{H}^+]$ : 575.1013, found 575.0987.

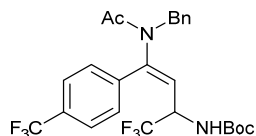

### Tert-butyl

**(E)-4-(N-benzylacetamido)-1,1,1-trifluoro-4-(4-(trifluoromethyl)phenyl)but-3-en-2-yl carbamate (3i)**, 73.3 mg, 71%), colorless oil;  $^1\text{H}$  NMR (400 MHz,  $\text{CDCl}_3$ )  $\delta$  7.63 (d,  $J = 7.9$  Hz, 2H), 7.36 (d,  $J = 7.9$  Hz, 2H), 7.21-7.18 (m, 3H), 7.09-7.03 (m, 2H), 5.16 (d,  $J = 8.4$  Hz, 1H), 4.87 (d,  $J = 11.8$  Hz, 2H), 4.62 (d,  $J = 14.6$  Hz, 1H), 4.18 (d,  $J = 14.6$  Hz, 1H), 2.13 (s, 3H), 1.35 (s, 9H);  $^{13}\text{C}$  NMR (101 MHz,  $\text{CDCl}_3$ )  $\delta$  170.2, 154.1, 144.6, 136.9, 136.5, 131.9 (q,  $J_{\text{C-F}} = 33.2$  Hz), 129.2, 128.9, 128.5, 127.7, 126.2 (q,  $J_{\text{C-F}} = 1.3$  Hz), 124.2 (q,  $J_{\text{C-F}} = 282.7$  Hz), 125.0, 122.4 (q,  $J_{\text{C-F}} = 3.4$  Hz), 81.2, 51.4 (q,  $J_{\text{C-F}} = 33.3$  Hz), 49.2, 28.1, 22.3;  $^{19}\text{F}$  NMR (282 MHz,  $\text{CDCl}_3$ )  $\delta$  -62.90, -75.28. HRMS (ESI)  $m/z$  calcd for  $\text{C}_{25}\text{H}_{26}\text{F}_6\text{N}_2\text{O}_3$  [ $\text{M}+\text{H}^+$ ]: 517.1920, found 517.1903.

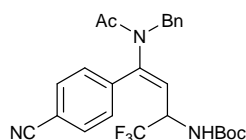

### Tert-butyl

**(E)-4-(N-benzylacetamido)-4-(4-cyanophenyl)-1,1,1-trifluorobut-3-en-2-yl carbamate (3j)**, 68.2 mg, 72%), colorless oil;  $^1\text{H}$  NMR (400 MHz,  $\text{CDCl}_3$ )  $\delta$  7.74 (d,  $J = 7.9$  Hz, 2H), 7.42 (d,  $J = 7.9$  Hz, 2H), 7.17 (d,  $J = 5.1$  Hz, 3H), 7.13-7.11 (m, 2H), 5.28 (d,  $J = 10.2$  Hz, 1H), 4.98-4.86 (m, 2H), 4.68 (d,  $J = 14.5$  Hz, 1H), 4.37-4.26 (m, 1H), 2.20 (s, 3H), 1.43 (s, 9H);  $^{13}\text{C}$  NMR (101 MHz,  $\text{CDCl}_3$ )  $\delta$  170.1, 154.0, 144.3, 136.3, 132.8, 132.1, 129.4, 128.8, 128.7, 128.5, 127.7, 126.6, 124.1 (q,  $J_{\text{C-F}} = 283.3$  Hz), 118.0, 113.7, 81.2, 51.1 (q,  $J_{\text{C-F}} = 31.7$  Hz), 49.9, 28.1, 22.3;  $^{19}\text{F}$  NMR (282 MHz,  $\text{CDCl}_3$ )  $\delta$  -75.13. HRMS (ESI)  $m/z$  calcd for  $\text{C}_{25}\text{H}_{26}\text{F}_3\text{N}_3\text{NaO}_3$  [ $\text{M}+\text{Na}^+$ ]: 496.1818, found 496.1796.

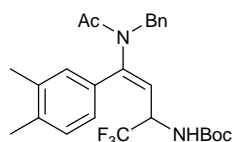

### Tert-butyl

**(E)-4-(N-benzylacetamido)-4-(3,4-dimethylphenyl)-1,1,1-trifluorobut-3-en-2-yl carbamate (3k)**, 91.5 mg, 96%), colorless oil;  $^1\text{H}$  NMR (400 MHz,  $\text{CDCl}_3$ )  $\delta$  7.20-7.14 (m, 3H), 7.09 (t,  $J = 7.3$  Hz, 3H), 6.94 (d,  $J = 8.6$  Hz, 2H), 5.04-4.94 (m, 3H), 4.68 (d,

$J = 14.4$  Hz, 1H), 4.11 (d,  $J = 14.5$  Hz, 1H), 2.20 (d,  $J = 6.8$  Hz, 6H), 2.09 (s, 3H), 1.36 (s, 9H);  $^{13}\text{C}$  NMR (101 MHz,  $\text{CDCl}_3$ )  $\delta$  170.5, 154.1, 146.3, 139.0, 137.5, 137.0, 130.3, 129.8, 129.0, 128.3, 127.4, 126.0, 124.6 (q,  $J_{\text{C-F}} = 285.2$  Hz), 119.76, 80.7, 51.1 (q,  $J_{\text{C-F}} = 31.5$  Hz), 28.2, 22.3, 19.8, 19.7;  $^{19}\text{F}$  NMR (282 MHz,  $\text{CDCl}_3$ )  $\delta$  -75.60. HRMS (ESI)  $m/z$  calcd for  $\text{C}_{26}\text{H}_{32}\text{F}_3\text{N}_2\text{O}_3$  [ $\text{M}+\text{H}^+$ ]: 477.2360, found 477.2359.

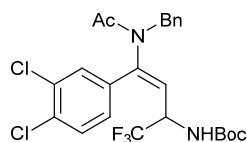

### Tert-butyl

**(E)-4-(N-benzylacetamido)-4-(3,4-dichlorophenyl)-1,1,1-trifluorobut-3-en-2-yl carbamate (3l)**, 95.2 mg, 92%), colorless oil;  $^1\text{H}$  NMR (400 MHz,  $\text{CDCl}_3$ )  $\delta$  7.43 (d,  $J = 8.3$  Hz, 1H), 7.24-7.17 (m, 4H), 7.09-6.98 (m, 3H), 5.50-5.11 (m, 2H), 4.88-4.81 (m, 1H), 4.60 (d,  $J = 14.6$  Hz, 1H), 4.21 (d,  $J = 14.7$  Hz, 1H), 2.09 (s, 3H), 1.35 (s, 9H);  $^{13}\text{C}$  NMR (101 MHz,  $\text{CDCl}_3$ )  $\delta$  170.2, 154.1, 143.8, 136.4, 134.5, 133.6, 133.2, 131.2, 130.5, 128.9, 128.5, 128.0, 127.7, 124.3 (q,  $J_{\text{C-F}} = 282.8$  Hz), 122.1, 81.1, 51.1 (q,  $J_{\text{C-F}} = 32.0$  Hz), 49.3, 28.1, 22.3;  $^{19}\text{F}$  NMR (282 MHz,  $\text{CDCl}_3$ )  $\delta$  -75.23. HRMS (ESI)  $m/z$  calcd for  $\text{C}_{24}\text{H}_{26}\text{Cl}_2\text{F}_3\text{N}_2\text{O}_3$  [ $\text{M}+\text{H}^+$ ]: 517.1267, found 517.1281.

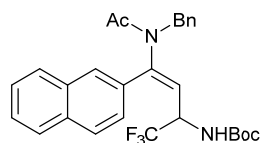

### Tert-butyl

**(E)-4-(N-benzylacetamido)-1,1,1-trifluoro-4-(naphthalen-2-yl)but-3-en-2-yl carbamate (3m)**, 90.7 mg, 91%), colorless oil;  $^1\text{H}$  NMR (400 MHz,  $\text{CDCl}_3$ )  $\delta$  7.92 (d,  $J = 8.6$  Hz, 1H), 7.89-7.85 (m, 2H), 7.81 (s, 1H), 7.57-7.55 (m, 2H), 7.37 (d,  $J = 8.7$  Hz, 1H), 7.31-7.24 (m, 4H), 7.20-7.18 (m, 2H), 5.29-5.1 (m, 2H), 4.88-4.80 (m, 2H), 4.26-4.21 (m, 1H), 2.26 (s, 3H), 1.46 (s, 9H);  $^{13}\text{C}$  NMR (101 MHz,  $\text{CDCl}_3$ )  $\delta$  170.5, 154.0, 146.2, 136.9, 133.8, 133.0, 130.3, 129.2, 129.0, 128.6, 128.4, 127.8, 127.5, 127.4, 126.9, 126.4, 124.5 (q,  $J_{\text{C-F}} = 283.6$  Hz), 125.0, 120.8, 80.9, 51.2 (q,  $J_{\text{C-F}} = 33.8$  Hz), 49.2, 28.2, 22.5;  $^{19}\text{F}$  NMR (282 MHz,  $\text{CDCl}_3$ )  $\delta$  -75.45. HRMS (ESI)  $m/z$  calcd for  $\text{C}_{28}\text{H}_{30}\text{F}_3\text{N}_2\text{O}_3$  [ $\text{M}+\text{H}^+$ ]: 499.2203, found 499.2200.

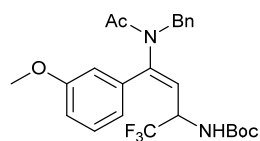

### Tert-butyl

**(E)-(4-(N-benzylacetamido)-1,1,1-trifluoro-4-(3-methoxyphenyl)but-3-en-2-yl)carbamate (3n)**, 74.6 mg, 78%), colorless oil;  $^1\text{H}$  NMR (400 MHz,  $\text{CDCl}_3$ )  $\delta$  7.28 (t,  $J = 8.0$  Hz, 1H), 7.21-7.09 (m, 5H), 6.89 (d,  $J = 8.4, 2.4$  Hz, 1H), 6.81 (d,  $J = 7.7$  Hz, 1H), 6.73 (s, 1H), 5.08-4.81 (m, 3H), 4.66 (d,  $J = 14.6$  Hz, 1H), 4.16 (d,  $J = 14.5$  Hz, 1H), 3.72 (s, 3H), 2.11 (s, 3H), 1.34 (s, 9H);  $^{13}\text{C}$  NMR (101 MHz,  $\text{CDCl}_3$ )  $\delta$  170.3, 160.0, 154.1, 145.9, 136.9, 134.5, 130.2, 129.0, 128.3, 127.5, 124.5 (q,  $J_{\text{C-F}} = 283.5$  Hz), 120.9, 120.6, 115.9, 113.9, 80.8, 55.3, 51.1 (q,  $J_{\text{C-F}} = 28.4$  Hz), 49.2, 28.1, 22.3;  $^{19}\text{F}$  NMR (376 MHz,  $\text{CDCl}_3$ )  $\delta$  -75.42. HRMS (ESI)  $m/z$  calcd for  $\text{C}_{25}\text{H}_{30}\text{F}_3\text{N}_2\text{O}_4$  [ $\text{M}+\text{Na}^+$ ]: 501.1972, found 501.1961.

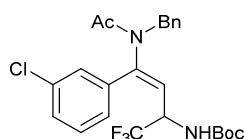

#### Tert-butyl

**(E)-(4-(N-benzylacetamido)-4-(3-chlorophenyl)-1,1,1-trifluorobut-3-en-2-yl)carbamate (3o)**, 79.2 mg, 83%), colorless oil;  $^1\text{H}$  NMR (400 MHz,  $\text{CDCl}_3$ )  $\delta$  7.36-7.28 (m, 2H), 7.22-7.12 (m, 5H), 7.07 (d,  $J = 7.0$  Hz, 2H), 5.13 (d,  $J = 10.2$  Hz, 2H), 4.98-4.83 (m, 2H), 4.62 (d,  $J = 14.6$  Hz, 1H), 4.18 (d,  $J = 14.9$  Hz, 1H), 2.11 (s, 3H), 1.35 (s, 9H);  $^{13}\text{C}$  NMR (101 MHz,  $\text{CDCl}_3$ )  $\delta$  170.2, 154.0, 144.7, 136.6, 135.2, 130.4, 130.2, 128.9, 128.6, 128.4, 127.6, 127.0, 124.3 (q,  $J_{\text{C-F}} = 283.4$  Hz), 121.7, 81.0, 51.1 (q,  $J_{\text{C-F}} = 31.5$  Hz), 49.2, 28.2, 22.3;  $^{19}\text{F}$  NMR (282 MHz,  $\text{CDCl}_3$ )  $\delta$  -75.34. HRMS (ESI)  $m/z$  calcd for  $\text{C}_{24}\text{H}_{27}\text{ClF}_3\text{N}_2\text{O}_3$  [ $\text{M}+\text{H}^+$ ]: 483.1657, found 483.1666.

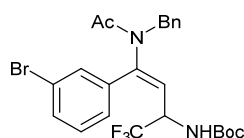

#### Tert-butyl

**(E)-(4-(N-benzylacetamido)-4-(3-bromophenyl)-1,1,1-trifluorobut-3-en-2-yl)carbamate (3p)**, 67.5 mg, 64%), colorless oil;  $^1\text{H}$  NMR (400 MHz,  $\text{CDCl}_3$ )  $\delta$  7.51-7.29 (m, 2H), 7.25-7.16 (m, 5H), 7.08-7.06 (m, 2H), 5.12 (d,  $J = 8.3$  Hz, 1H), 4.86 (s, 2H), 4.65 (d,  $J = 14.6$  Hz, 1H), 4.16 (d,  $J = 14.8$  Hz, 1H), 2.12 (s, 3H), 1.36 (s, 9H);  $^{13}\text{C}$  NMR (101 MHz,  $\text{CDCl}_3$ )  $\delta$  170.3, 154.0, 144.7, 136.6, 135.2, 133.2, 131.5, 130.6, 128.9, 128.4, 127.6, 127.4, 124.3 (q,  $J_{\text{C-F}} = 282.9$  Hz), 123.3, 121.7, 81.1, 51.0 (q,  $J_{\text{C-F}} = 32.7$  Hz), 49.2, 28.2, 22.3;  $^{19}\text{F}$  NMR (282 MHz,  $\text{CDCl}_3$ )  $\delta$  -75.37. HRMS (ESI)  $m/z$  calcd for  $\text{C}_{24}\text{H}_{27}\text{BrF}_3\text{N}_2\text{O}_3$  [ $\text{M}+\text{H}^+$ ]: 527.1152, found 527.1145.

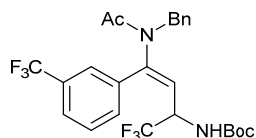

### Tert-butyl

**(E)-4-(N-benzylacetamido)-1,1,1-trifluoro-4-(3-(trifluoromethyl)phenyl)but-3-en-2-yl carbamate (3q)**, 72.3 mg, 70%), colorless oil;  $^1\text{H}$  NMR (400 MHz,  $\text{CDCl}_3$ )  $\delta$  7.62 (d,  $J = 7.7$  Hz, 1H), 7.50 (t,  $J = 7.8$  Hz, 1H), 7.43-7.39 (m, 2H), 7.18 (d,  $J = 6.1$  Hz, 3H), 7.05 (d,  $J = 6.6$  Hz, 2H), 5.21 (d,  $J = 10.3$  Hz, 1H), 4.96 (d,  $J = 9.4$  Hz, 1H), 4.84-4.77 (m, 1H), 4.64 (d,  $J = 14.7$  Hz, 1H), 4.19 (d,  $J = 14.7$  Hz, 1H), 2.13 (s, 3H), 1.34 (s, 9H);  $^{13}\text{C}$  NMR (101 MHz,  $\text{CDCl}_3$ )  $\delta$  170.2, 154.0, 144.8, 136.5, 134.3, 132.1, 131.7 (q,  $J_{\text{C-F}} = 33.1$  Hz), 129.7, 128.9, 128.5, 127.7, 126.8 (q,  $J_{\text{C-F}} = 2.6$  Hz), 124.3 (q,  $J_{\text{C-F}} = 282.9$  Hz), 125.5 (q,  $J_{\text{C-F}} = 3.2$  Hz), 123.6 (q,  $J_{\text{C-F}} = 273.7$  Hz), 122.0, 81.10, 51.4 (q,  $J_{\text{C-F}} = 31.9$  Hz), 49.3, 28.1, 22.4;  $^{19}\text{F}$  NMR (282 MHz,  $\text{CDCl}_3$ )  $\delta$  -62.79, -75.34. HRMS (ESI)  $m/z$  calcd for  $\text{C}_{25}\text{H}_{26}\text{F}_6\text{N}_2\text{O}_3$   $[\text{M}+\text{H}^+]$ : 517.1920, found 517.1911.

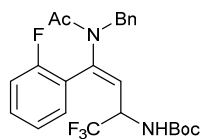

### Tert-butyl

**(E)-4-(N-benzylacetamido)-1,1,1-trifluoro-4-(2-fluorophenyl)but-3-en-2-yl carbamate (3r)**, 53.2 mg, 57%), colorless oil;  $^1\text{H}$  NMR (400 MHz,  $\text{CDCl}_3$ )  $\delta$  7.37-7.32 (m, 1H), 7.20-7.02 (m, 8H), 5.27 (d,  $J = 10.0$  Hz, 1H), 5.06-5.00 (m, 1H), 4.74-4.65 (m, 1H), 4.57 (d,  $J = 14.8$  Hz, 1H), 4.23 (d,  $J = 15.1$  Hz, 1H), 2.17 (s, 3H), 1.32 (s, 9H);  $^{13}\text{C}$  NMR (101 MHz,  $\text{CDCl}_3$ )  $\delta$  170.5, 160.3 (d,  $J_{\text{C-F}} = 251.1$  Hz), 154.1, 141.4, 136.9, 132.0 (d,  $J_{\text{C-F}} = 8.5$  Hz), 131.5, 128.6, 128.3, 127.4, 124.3 (q,  $J_{\text{C-F}} = 285.0$  Hz), 124.6 (d,  $J_{\text{C-F}} = 3.6$  Hz), 121.0, 116.5 (d,  $J_{\text{C-F}} = 21.7$  Hz), 80.7, 51.3 (q,  $J_{\text{C-F}} = 33.3$  Hz), 48.7, 28.1, 22.3, 22.2;  $^{19}\text{F}$  NMR (282 MHz,  $\text{CDCl}_3$ )  $\delta$  -75.54, -112.52. HRMS (ESI)  $m/z$  calcd for  $\text{C}_{24}\text{H}_{27}\text{F}_4\text{N}_2\text{O}_3$   $[\text{M}+\text{H}^+]$ : 467.1952, found 467.1949.

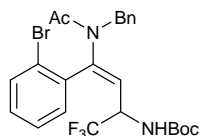

### Tert-butyl

**(E)-4-(N-benzylacetamido)-4-(2-bromophenyl)-1,1,1-trifluorobut-3-en-2-yl carbamate (3s)**, 78.0 mg, 74%), colorless oil;  $^1\text{H}$  NMR (400 MHz,  $\text{CDCl}_3$ )  $\delta$  7.58 (d,  $J =$



7.9 Hz, 1H), 7.38-7.24 (m, 6H), 7.16-7.14 (m, 2H), 5.18 (d,  $J = 10.5$  Hz, 1H), 4.97-4.80 (m, 2H), 4.74 (d,  $J = 14.6$  Hz, 1H), 4.23 (d,  $J = 14.8$  Hz, 1H), 2.20 (s, 3H), 1.44 (s, 9H);  $^{13}\text{C}$  NMR (101 MHz,  $\text{CDCl}_3$ )  $\delta$  170.2, 153.9, 144.7, 136.6, 135.2, 133.2, 131.4, 130.6, 128.9, 128.4, 127.6, 127.4, 124.3 (q,  $J_{\text{C-F}} = 283.5$  Hz), 123.3, 121.6, 81.13, 51.0 (q,  $J_{\text{C-F}} = 32.5$  Hz), 49.1, 28.2, 22.3;  $^{19}\text{F}$  NMR (282 MHz,  $\text{CDCl}_3$ )  $\delta$  -75.38. HRMS (ESI)  $m/z$  calcd for  $\text{C}_{24}\text{H}_{27}\text{BrF}_3\text{N}_2\text{O}_3$  [ $\text{M}+\text{H}^+$ ]: 527.1152, found 527.1152.

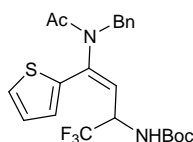

### Tert-butyl

**(E)-4-(N-benzylacetamido)-1,1,1-trifluoro-4-(thiophen-2-yl)but-3-en-2-yl carbamate (3t)**, 70.0 mg, 77%), colorless oil;  $^1\text{H}$  NMR (400 MHz,  $\text{CDCl}_3$ )  $\delta$  7.40 (d,  $J = 5.0$  Hz, 1H), 7.26-7.18 (m, 4H), 7.14-7.11 (m, 2H), 7.04 (t,  $J = 4.4$  Hz, 1H), 5.24-5.18 (m, 1H), 5.01-4.89 (m, 2H), 4.59 (d,  $J = 15.0$  Hz, 1H), 4.47-4.42 (m, 1H), 2.04 (s, 3H), 1.36 (s, 9H);  $^{13}\text{C}$  NMR (101 MHz,  $\text{CDCl}_3$ )  $\delta$  170.1, 154.3, 139.1, 136.7, 136.5, 129.6, 129.4, 128.7, 128.4, 128.2, 127.7, 127.1, 124.4 (q,  $J_{\text{C-F}} = 280.1$  Hz), 121.4, 81.0, 51.2 (q,  $J_{\text{C-F}} = 34.3$  Hz), 49.6, 28.7, 21.9;  $^{19}\text{F}$  NMR (376 MHz,  $\text{CDCl}_3$ )  $\delta$  -75.36. HRMS (ESI)  $m/z$  calcd for  $\text{C}_{22}\text{H}_{26}\text{F}_3\text{N}_2\text{O}_3\text{S}$  [ $\text{M}+\text{H}^+$ ]: 455.1611, found 455.1606.

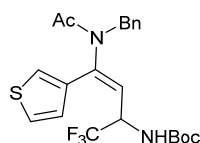

### Tert-butyl

**(E)-4-(N-benzylacetamido)-1,1,1-trifluoro-4-(thiophen-3-yl)but-3-en-2-yl carbamate (3u)**, 79.0 mg, 87%), colorless oil;  $^1\text{H}$  NMR (400 MHz,  $\text{CDCl}_3$ )  $\delta$  7.40 (s, 1H), 7.34-7.32 (m, 1H), 7.20-7.15 (m, 3H), 7.11-7.09 (m, 2H), 6.98 (d,  $J = 5.0$  Hz, 1H), 5.13-4.96 (m, 3H), 4.64 (d,  $J = 14.2$  Hz, 1H), 4.27 (d,  $J = 14.2$  Hz, 1H), 2.03 (s, 3H), 1.36 (s, 9H);  $^{13}\text{C}$  NMR (101 MHz,  $\text{CDCl}_3$ )  $\delta$  170.1, 154.3, 140.9, 136.8, 134.5, 129.2, 128.3, 127.6, 127.3, 127.0, 124.4 (q,  $J_{\text{C-F}} = 283.1$  Hz), 120.8, 80.9, 51.0 (q,  $J_{\text{C-F}} = 32.0$  Hz), 49.4, 28.2, 22.2;  $^{19}\text{F}$  NMR (376 MHz,  $\text{CDCl}_3$ )  $\delta$  -75.39. HRMS (ESI)  $m/z$  calcd for  $\text{C}_{22}\text{H}_{26}\text{F}_3\text{N}_2\text{O}_3\text{S}$  [ $\text{M}+\text{H}^+$ ]: 455.1611, found 455.1609.

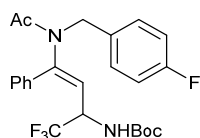

### Tert-butyl

**(E)-(1,1,1-trifluoro-4-(N-(4-fluorobenzyl)acetamido)-4-phenylbut-3-en-2-yl)carbamate (3v, 68.1 mg, 73%),** colorless oil;  $^1\text{H}$  NMR (400 MHz,  $\text{CDCl}_3$ )  $\delta$  7.39-7.37 (m, 3H), 7.25-7.23 (m, 2H), 7.08-7.04 (m, 2H), 6.87 (t,  $J = 8.5$  Hz, 2H), 5.06-4.92 (m, 3H), 4.57 (d,  $J = 14.5$  Hz, 1H), 4.13 (d,  $J = 14.4$  Hz, 1H), 2.13 (s, 3H), 1.35 (s, 9H);  $^{13}\text{C}$  NMR (101 MHz,  $\text{CDCl}_3$ )  $\delta$  170.3, 162.1 (d,  $J_{\text{C-F}} = 246.7$  Hz), 154.0, 145.9, 133.0, 132.7, 130.7 (d,  $J_{\text{C-F}} = 8.1$  Hz), 130.1, 129.2, 128.6, 124.4 (q,  $J_{\text{C-F}} = 282.9$  Hz), 120.8, 115.2 (d,  $J_{\text{C-F}} = 21.4$  Hz), 80.9, 51.1 (q,  $J_{\text{C-F}} = 31.5$  Hz), 48.2, 28.1, 22.3;  $^{19}\text{F}$  NMR (376 MHz,  $\text{CDCl}_3$ )  $\delta$  -75.33, -114.85. HRMS (ESI)  $m/z$  calcd for  $\text{C}_{24}\text{H}_{27}\text{F}_4\text{N}_2\text{O}_3$  [ $\text{M}+\text{H}^+$ ]: 467.1952, found 467.19491.

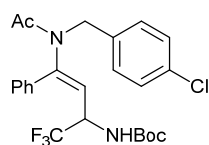

### Tert-butyl

**(E)-(4-(N-(4-chlorobenzyl)acetamido)-1,1,1-trifluoro-4-phenylbut-3-en-2-yl)carbamate (3w, 76.3 mg, 79%),** colorless oil;  $^1\text{H}$  NMR (400 MHz,  $\text{CDCl}_3$ )  $\delta$  7.46-7.44 (m, 3H), 7.32-7.30 (m, 2H), 7.22 (d,  $J = 8.1$  Hz, 2H), 7.09 (d,  $J = 8.0$  Hz, 2H), 5.16-4.86 (m, 3H), 4.66 (d,  $J = 14.6$  Hz, 1H), 4.17 (d,  $J = 14.6$  Hz, 1H), 2.20 (s, 3H), 1.43 (s, 9H);  $^{13}\text{C}$  NMR (101 MHz,  $\text{CDCl}_3$ )  $\delta$  170.4, 154.1, 145.9, 135.4, 133.3, 132.9, 130.4, 130.2, 129.2, 128.6, 128.5, 124.4 (q,  $J_{\text{C-F}} = 283.8$  Hz), 120.8, 80.9, 51.2 (q,  $J_{\text{C-F}} = 31.1$  Hz), 48.3, 28.1, 22.2;  $^{19}\text{F}$  NMR (282 MHz,  $\text{CDCl}_3$ )  $\delta$  -75.31. HRMS (ESI)  $m/z$  calcd for  $\text{C}_{24}\text{H}_{27}\text{ClF}_3\text{N}_2\text{O}_3$  [ $\text{M}+\text{H}^+$ ]: 483.1657, found 483.1656.

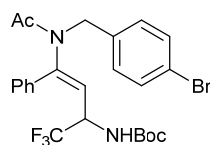

### Tert-butyl

**(E)-(4-(N-(4-bromobenzyl)acetamido)-1,1,1-trifluoro-4-phenylbut-3-en-2-yl)carbamate (3x, 71.7 mg, 68%),** colorless oil;  $^1\text{H}$  NMR (400 MHz,  $\text{CDCl}_3$ )  $\delta$  7.47-7.44 (m, 3H), 7.40-7.37 (m, 2H), 7.32-7.30 (m, 2H), 7.04 (d,  $J = 8.4$  Hz, 2H), 5.15-5.13 (m, 1H), 5.00 (s, 2H), 4.66 (d,  $J = 14.5$  Hz, 1H), 4.13 (d,  $J = 14.6$  Hz, 1H), 2.20 (s, 3H), 1.43 (s, 9H);  $^{13}\text{C}$  NMR (101 MHz,  $\text{CDCl}_3$ )  $\delta$  170.4, 154.0, 145.9, 135.9, 132.9, 131.5, 130.7, 130.2, 129.2, 128.6, 124.4 (q,  $J_{\text{C-F}} = 282.7$  Hz), 121.5, 120.8, 81.0, 51.2 (q,  $J_{\text{C-F}} = 29.9$  Hz), 48.4, 28.2, 22.2;  $^{19}\text{F}$  NMR (376 MHz,  $\text{CDCl}_3$ )  $\delta$  -75.33. HRMS (ESI)  $m/z$  calcd for  $\text{C}_{24}\text{H}_{27}\text{BrF}_3\text{N}_2\text{O}_3$  [ $\text{M}+\text{H}^+$ ]: 527.1152, found 527.1152.

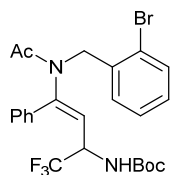

### Tert-butyl

**(E)-4-(N-(2-bromobenzyl)acetamido)-1,1,1-trifluoro-4-phenylbut-3-en-2-yl carbamate (3y, 73.8 mg, 70%),** colorless oil;  $^1\text{H}$  NMR (400 MHz,  $\text{CDCl}_3$ )  $\delta$  7.40 (d,  $J = 8.0$  Hz, 1H), 7.36-7.32 (m, 3H), 7.17-7.14 (m, 2H), 7.11 (d,  $J = 7.5$  Hz, 1H), 7.06-6.99 (m, 2H), 5.33 (d,  $J = 10.2$  Hz, 1H), 5.02 (d,  $J = 9.4$  Hz, 1H), 4.95-4.89 (m, 1H), 4.74 (d,  $J = 15.4$  Hz, 1H), 4.41 (d,  $J = 15.2$  Hz, 1H), 2.18 (s, 3H), 1.33 (s, 9H);  $^{13}\text{C}$  NMR (101 MHz,  $\text{CDCl}_3$ )  $\delta$  170.6, 154.0, 146.0, 135.8, 132.8, 130.9, 130.1, 129.0, 128.6, 127.3, 124.5 (q,  $J_{\text{C-F}} = 283.7$  Hz), 123.8, 120.7, 80.8, 51.0 (q,  $J_{\text{C-F}} = 31.4$  Hz), 49.2, 28.1, 22.3;  $^{19}\text{F}$  NMR (282 MHz,  $\text{CDCl}_3$ )  $\delta$  -75.47. HRMS (ESI)  $m/z$  calcd for  $\text{C}_{24}\text{H}_{27}\text{BrF}_3\text{N}_2\text{O}_3$  [ $\text{M}+\text{H}^+$ ]: 527.1152, found 527.1155.

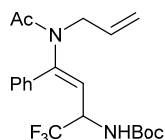

### Tert-butyl

**(E)-4-(N-allylacetamido)-1,1,1-trifluoro-4-phenylbut-3-en-2-yl carbamate (3z, 45.4 mg, 57%),** colorless oil;  $^1\text{H}$  NMR (400 MHz,  $\text{CDCl}_3$ )  $\delta$  7.37-7.32 (m, 3H), 7.25-7.21 (m, 2H), 5.72-5.62 (m, 1H), 5.40 (d,  $J = 10.2$  Hz, 1H), 5.22 (d,  $J = 9.5$  Hz, 1H), 5.04-4.85 (m, 3H), 4.02-3.97 (m, 1H), 3.73-3.67 (m, 1H), 2.10 (s, 3H), 1.37 (s, 9H);  $^{13}\text{C}$  NMR (101 MHz,  $\text{CDCl}_3$ )  $\delta$  170.3, 154.1, 146.5, 133.4, 132.5, 130.0, 129.1, 128.6, 124.6 (q,  $J_{\text{C-F}} = 281.7$  Hz), 119.7, 118.3, 80.9, 51.2 (q,  $J_{\text{C-F}} = 31.6$  Hz), 48.8, 28.1, 22.3;  $^9\text{F}$  NMR (282 MHz,  $\text{CDCl}_3$ )  $\delta$  -75.52. HRMS (ESI)  $m/z$  calcd for  $\text{C}_{20}\text{H}_{26}\text{F}_3\text{N}_2\text{O}_3$  [ $\text{M}+\text{H}^+$ ]: 399.1890, found 399.1892.

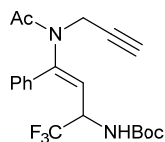

### Tert-butyl

**(E)-1,1,1-trifluoro-4-phenyl-4-(N-(prop-2-yn-1-yl)acetamido)but-3-en-2-yl carbamate (3aa, 69.0 mg, 87%),** colorless oil;  $^1\text{H}$  NMR (400 MHz,  $\text{CDCl}_3$ )  $\delta$  7.44-7.43 (m, 3H), 7.36-7.34 (m, 2H), 5.62 (d,  $J = 10.2$  Hz, 1H), 5.33-4.89 (m, 2H), 4.30 (d,  $J = 19.8$  Hz, 1H), 3.97 (d,  $J = 17.5$  Hz, 1H), 2.20-2.19 (d,  $J = 2.3$  Hz, 1H), 2.16 (s, 3H),

1.44 (s, 9H);  $^{13}\text{C}$  NMR (101 MHz,  $\text{CDCl}_3$ )  $\delta$  170.0, 154.1, 145.9, 132.8, 130.2, 129.1, 128.7, 124.6 (q,  $J_{\text{C-F}} = 283.3$  Hz), 120.2, 81.0, 78.3, 72.2, 51.2 (q,  $J_{\text{C-F}} = 32.0$  Hz), 35.6, 28.2, 22.2;  $^{19}\text{F}$  NMR (282 MHz,  $\text{CDCl}_3$ )  $\delta$  -75.47. HRMS (ESI)  $m/z$  calcd for  $\text{C}_{20}\text{H}_{24}\text{F}_3\text{N}_2\text{O}_3$  [ $\text{M}+\text{H}^+$ ]: 397.1734, found 397.1731.

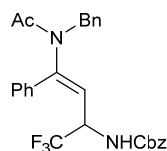

## Benzyl

### (*E*)-(4-(*N*-benzylacetamido)-1,1,1-trifluoro-4-phenylbut-3-en-2-yl)carbamate

(**3bb**, 69.5 mg, 72%), colorless oil;  $^1\text{H}$  NMR (400 MHz,  $\text{CDCl}_3$ )  $\delta$  7.45 (d,  $J = 5.3$  Hz, 2H), 7.39-7.28 (m, 8H), 7.25 (d,  $J = 6.6$  Hz, 3H), 7.16-7.14 (m, 2H), 5.36 (d,  $J = 9.0$  Hz, 1H), 5.17-5.07 (m, 4H), 4.72 (d,  $J = 14.5$  Hz, 1H), 4.23 (d,  $J = 14.5$  Hz, 1H), 2.17 (s, 3H);  $^{13}\text{C}$  NMR (101 MHz,  $\text{CDCl}_3$ )  $\delta$  170.4, 154.9, 146.4, 136.8, 135.8, 135.5, 133.0, 130.2, 129.2, 128.9, 128.6, 128.5, 128.4, 128.2, 128.1, 127.5, 124.3 (q,  $J_{\text{C-F}} = 283.4$  Hz), 120.1, 67.6, 51.7 (q,  $J_{\text{C-F}} = 32.9$  Hz), 49.1, 22.3;  $^{19}\text{F}$  NMR (282 MHz,  $\text{CDCl}_3$ )  $\delta$  -75.35. HRMS (ESI)  $m/z$  calcd for  $\text{C}_{27}\text{H}_{26}\text{F}_3\text{N}_2\text{O}_3$  [ $\text{M}+\text{Na}^+$ ]: 505.1709, found 505.1673.

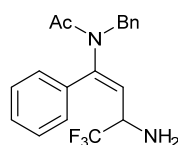

### (*E*)-*N*-(3-amino-4,4,4-trifluoro-1-phenylbut-1-en-1-yl)-*N*-benzylacetamide (**4**,

56.4 mg, 81%) colorless oil;  $^1\text{H}$  NMR (400 MHz,  $\text{CDCl}_3$ )  $\delta$  7.45-7.44 (m, 3H), 7.40-7.36 (m, 2H), 7.31-7.24 (m, 3H), 7.19-7.17 (m, 2H), 5.20 (d,  $J = 10.2$  Hz, 1H), 4.84 (d,  $J = 14.4$  Hz, 1H), 4.14 (d,  $J = 14.2$  Hz, 1H), 3.99-3.91 (m, 1H), 2.23 (s, 3H);  $^{13}\text{C}$  NMR (101 MHz,  $\text{CDCl}_3$ )  $\delta$  170.3, 145.0, 136.9, 133.7, 129.8, 129.1, 129.0, 128.6, 128.4, 127.5, 125.6 (q,  $J_{\text{C-F}} = 283.1$  Hz), 123.5, 52.4 (q,  $J_{\text{C-F}} = 30.5$  Hz), 49.0, 22.4;  $^{19}\text{F}$  NMR (282 MHz,  $\text{CDCl}_3$ )  $\delta$  -77.38. HRMS (ESI)  $m/z$  calcd for  $\text{C}_{19}\text{H}_{19}\text{F}_3\text{N}_2\text{O}$  [ $\text{M}+\text{H}^+$ ]: 349.1522, found 349.1523.

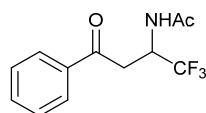

*N*-(1,1,1-trifluoro-4-oxo-4-phenylbutan-2-yl)acetamide (**5**, 25.4 mg, 49%) colorless oil;  $^1\text{H}$  NMR (400 MHz,  $\text{CDCl}_3$ )  $\delta$  7.95-7.93 (m, 2H), 7.64-7.60 (m, 1H), 7.52-7.48 (m, 2H), 6.59 (d,  $J = 9.5$  Hz, 1H), 5.30-5.18 (m, 1H), 3.50-3.43 (m, 1H), 3.32-3.27 (m, 1H), 2.03 (s, 3H);  $^{13}\text{C}$  NMR (101 MHz,  $\text{CDCl}_3$ )  $\delta$  195.7, 169.9, 136.0, 134.0, 129.2,

128.9, 128.1, 125.0 ( $J_{\text{C-F}} = 283.0$  Hz), 47.3 ( $J_{\text{C-F}} = 32.0$  Hz), 36.1, 23.1, 21.1;  $^{19}\text{F}$  NMR (282 MHz,  $\text{CDCl}_3$ )  $\delta$  -74.97. HRMS (ESI)  $m/z$  calcd for  $\text{C}_{12}\text{H}_{12}\text{F}_3\text{NO}$  [ $\text{M}+\text{H}^+$ ]: 260.0893, found 260.0897.

## 5. References

- [1] K. Tang, Y. Chen, J. Guan, Z. Wang, K. Chen, H. Xiang and H. Yang, *Org. Biomol. Chem.*, 2021, **19**, 7475.
- [2] J. Wang, S. Liu, Y. Huang, X.-H. Xu and F.-L. Qing, *Chem. Commun.*, 2022, **58**, 1346.
- [3] W. Yu, J. Chen, K. Gao, Z. Liu and Y. Zhang, *Org. Lett.*, 2014, **16**, 4870.

## 6. Copies of the $^1\text{H}$ NMR and $^{13}\text{C}$ NMR Spectra

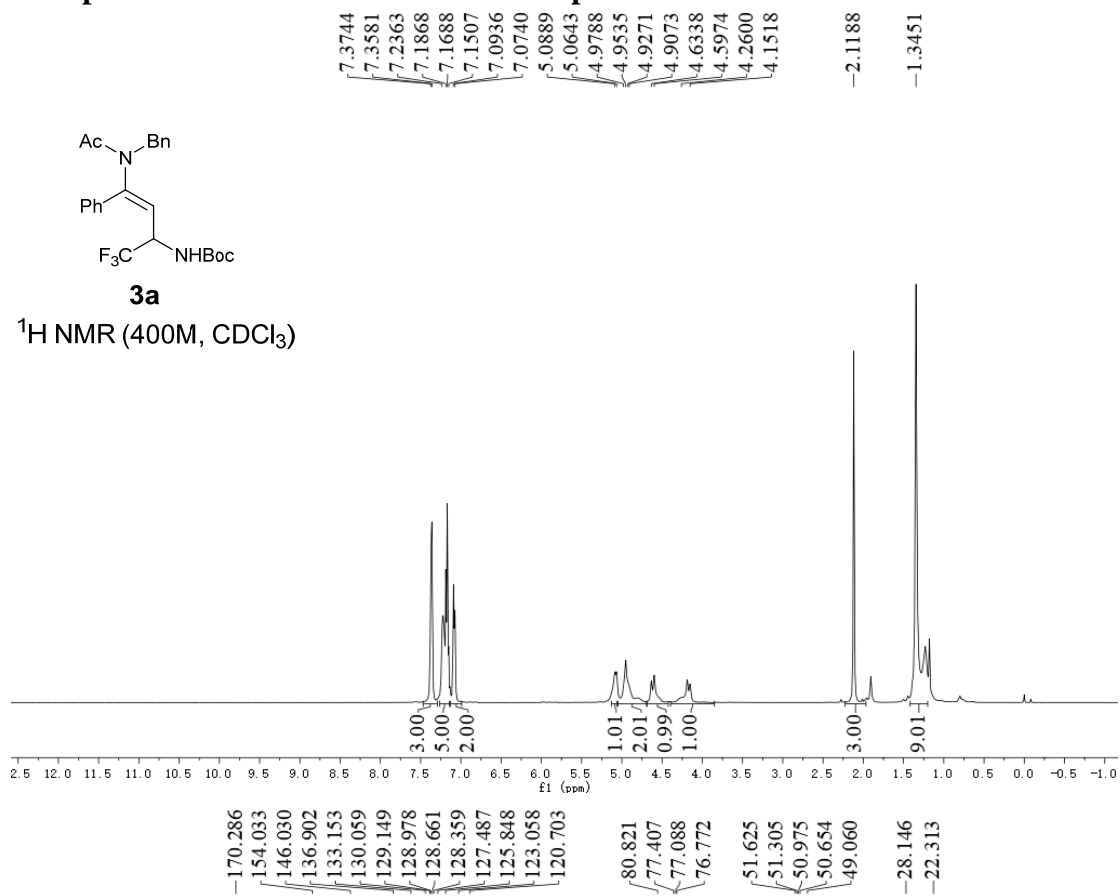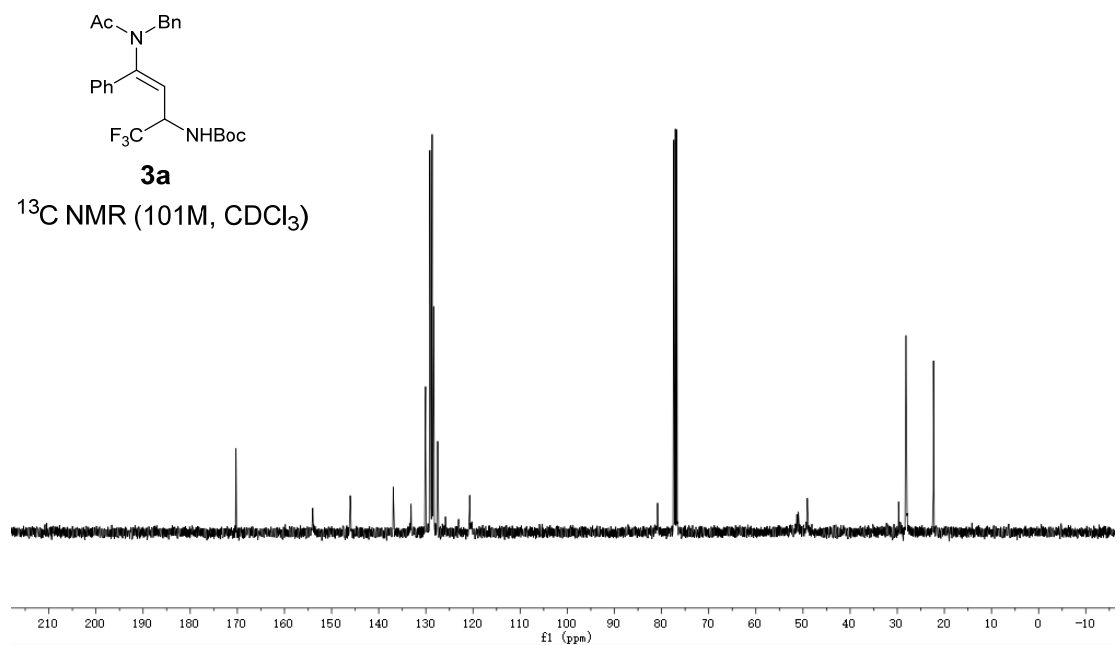

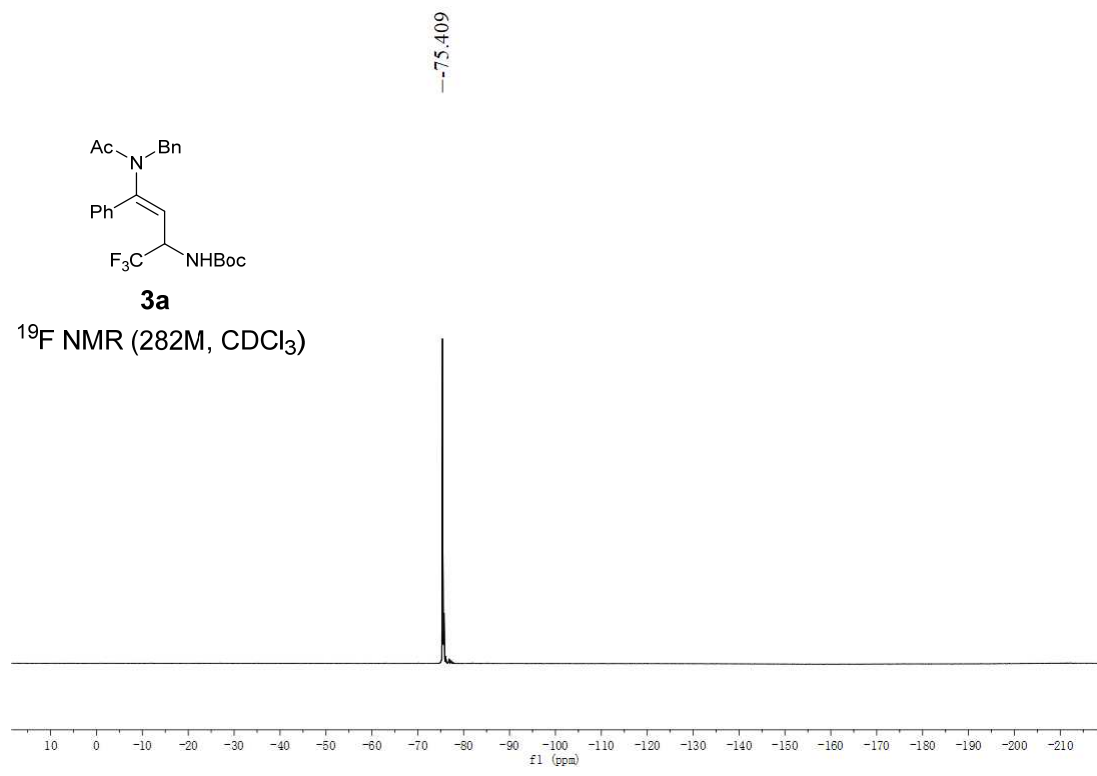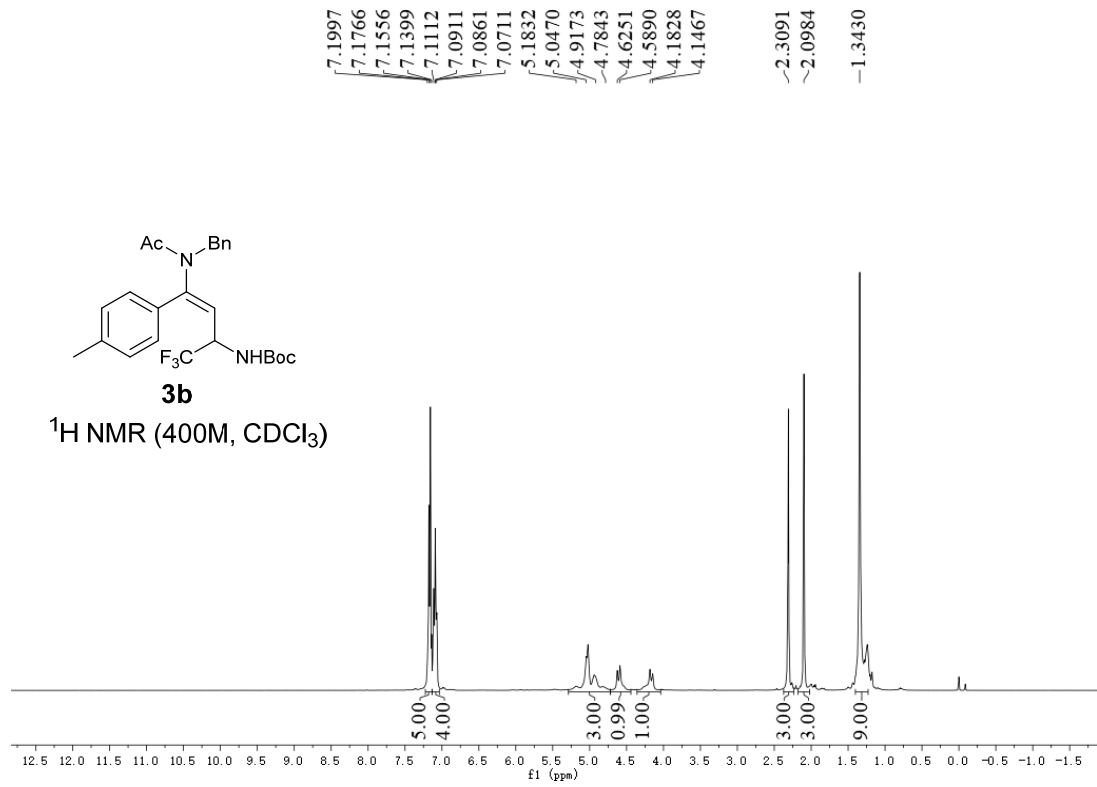



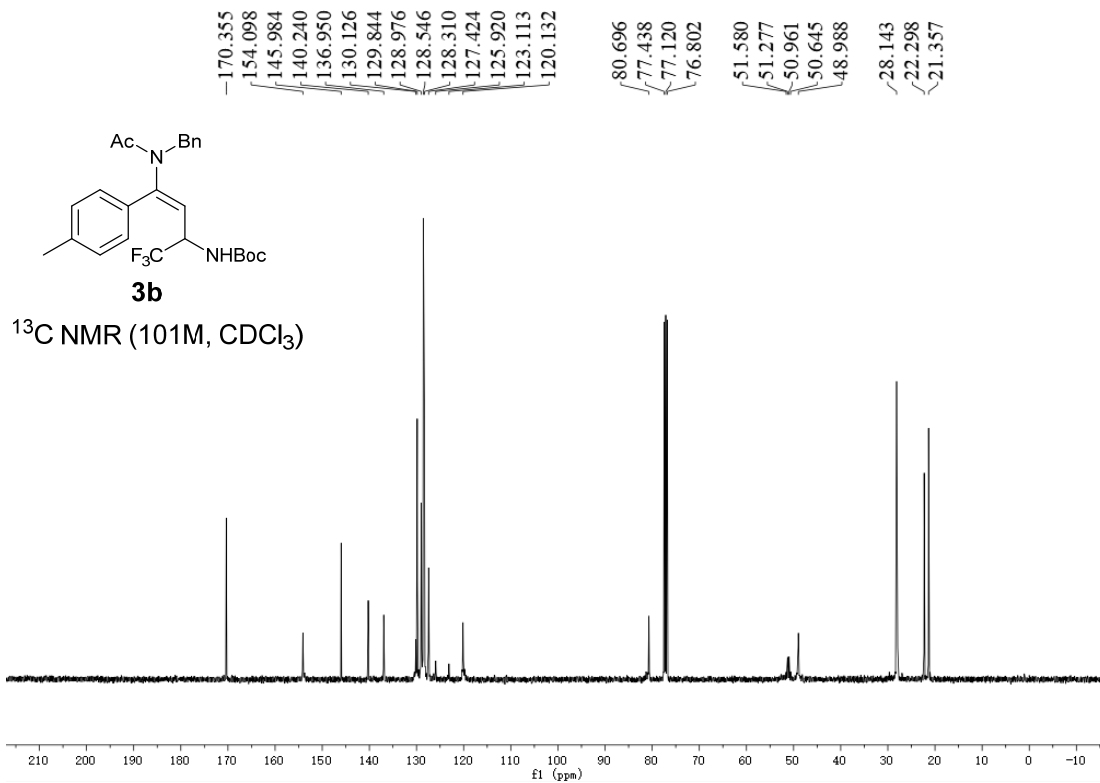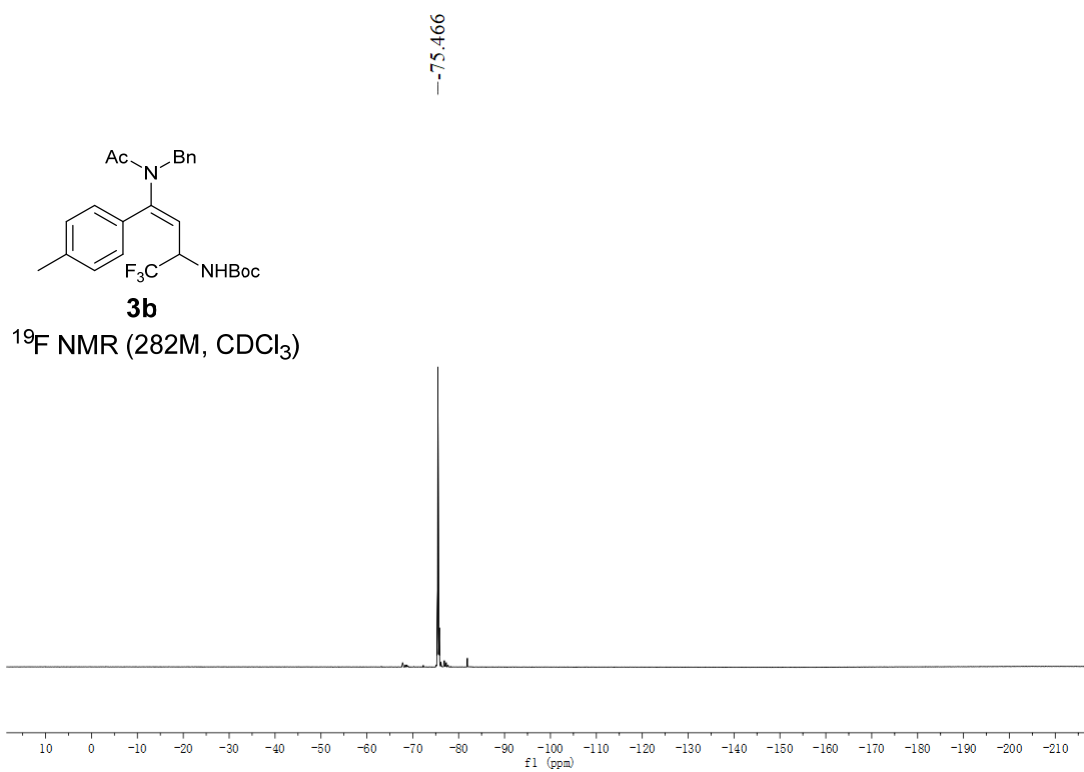



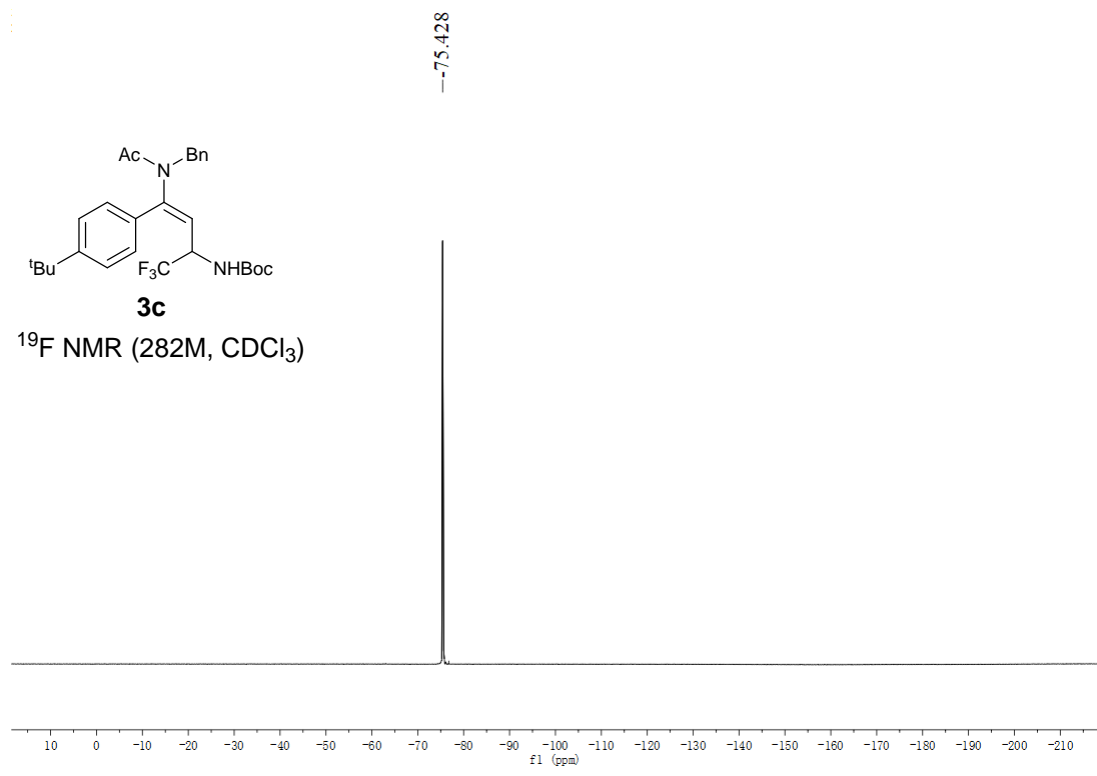

7.1806  
7.1623  
7.1431  
7.0862  
7.0687  
6.8817  
6.8609  
5.1153  
5.0093  
4.9460  
4.7634  
4.6174  
4.5814  
4.2062  
4.1698  
3.7591  
-2.0916  
-1.3452

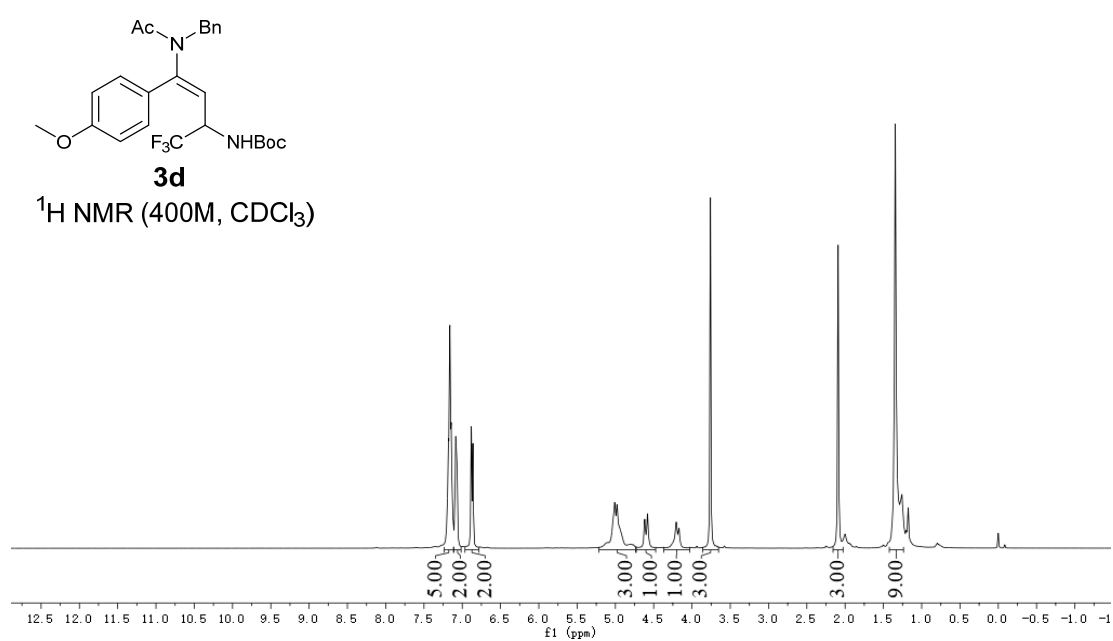

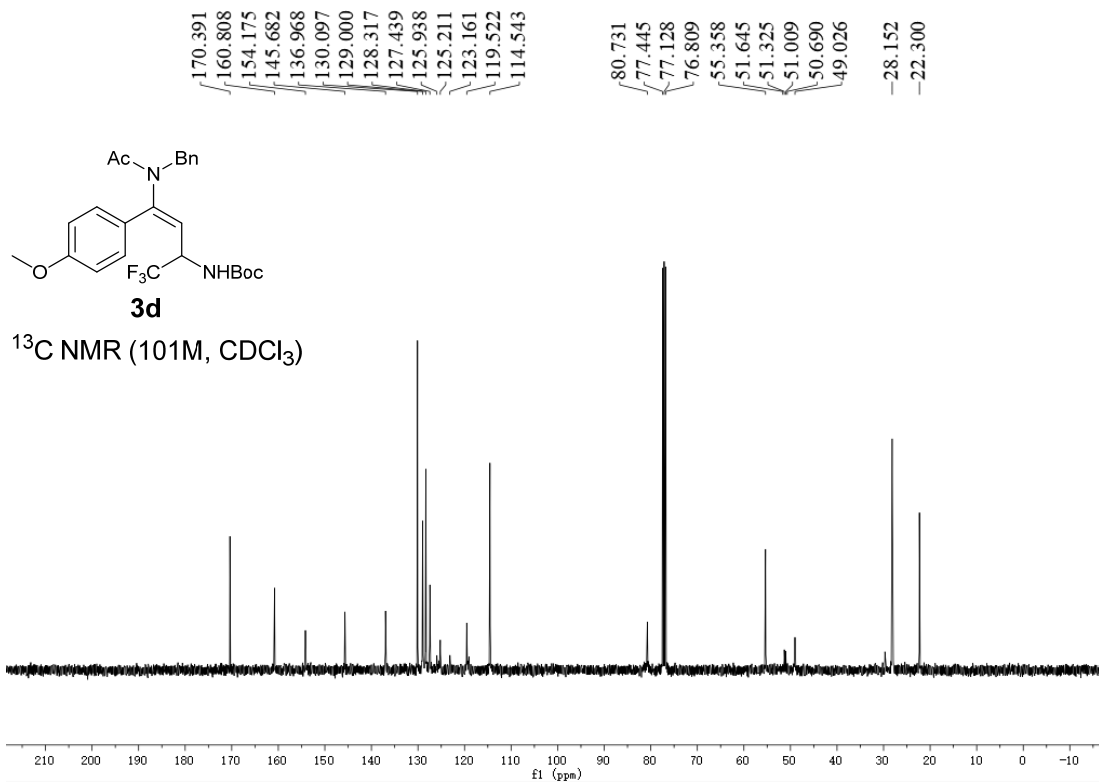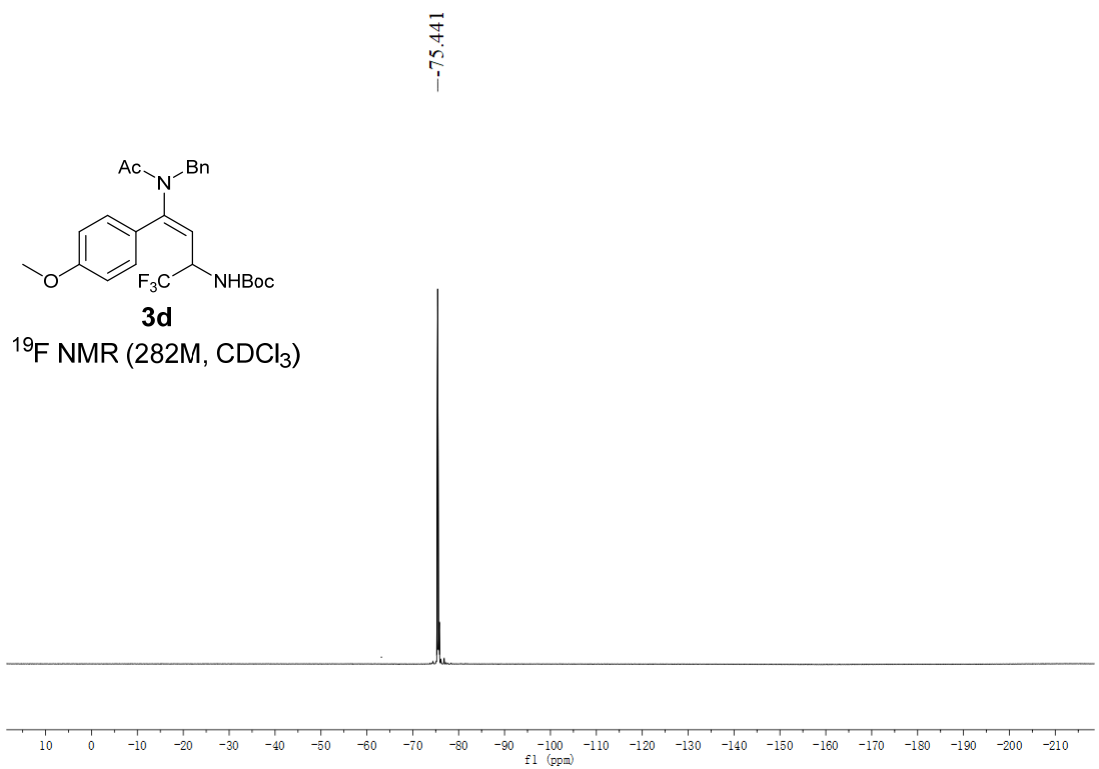

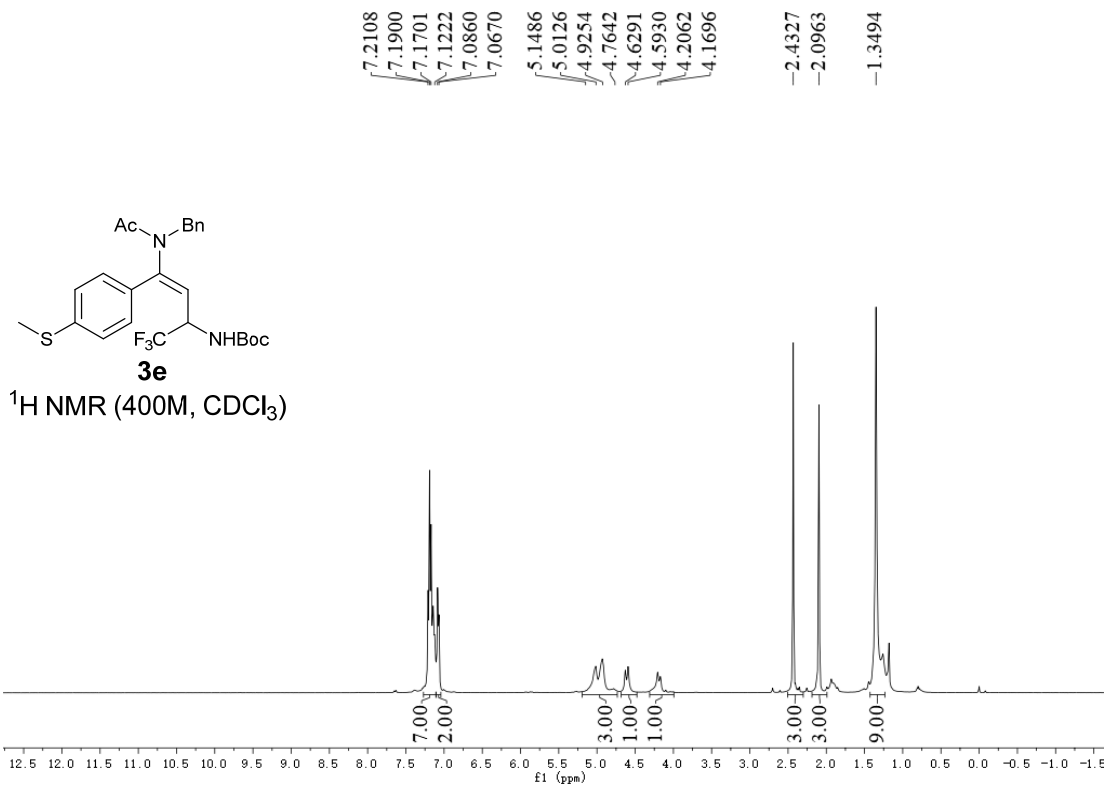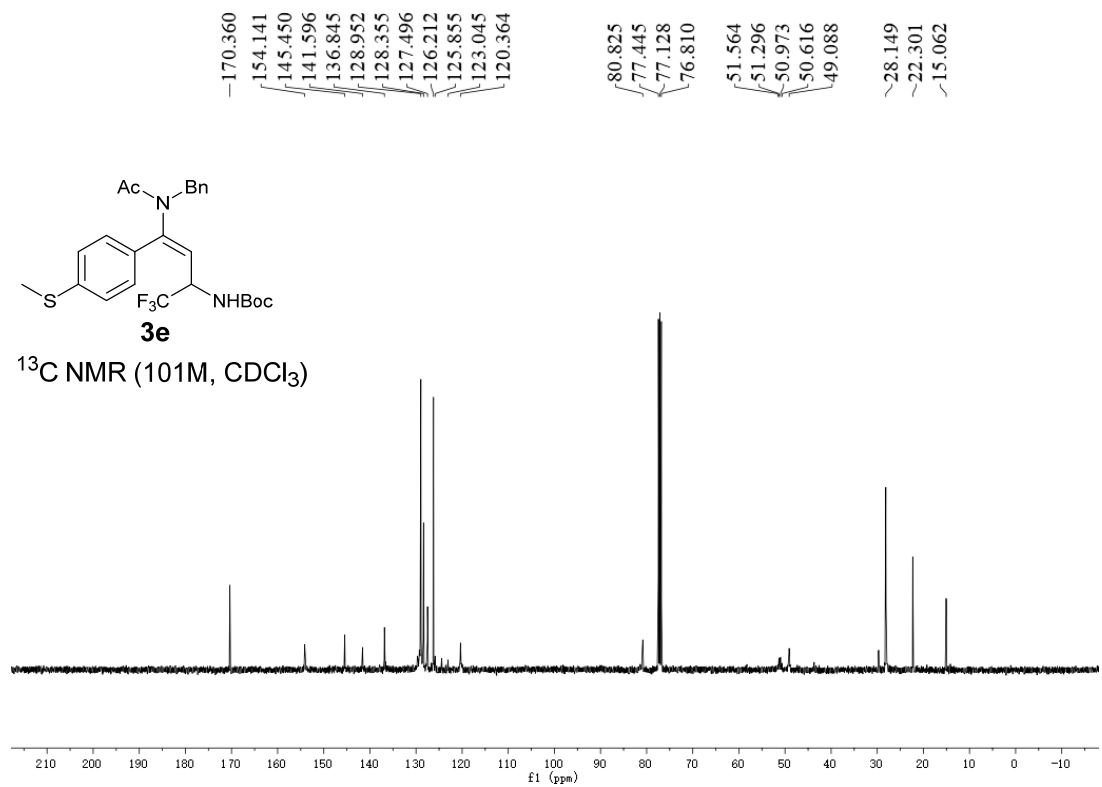

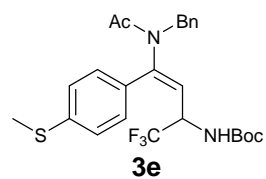

<sup>19</sup>F NMR (282M, CDCl<sub>3</sub>)

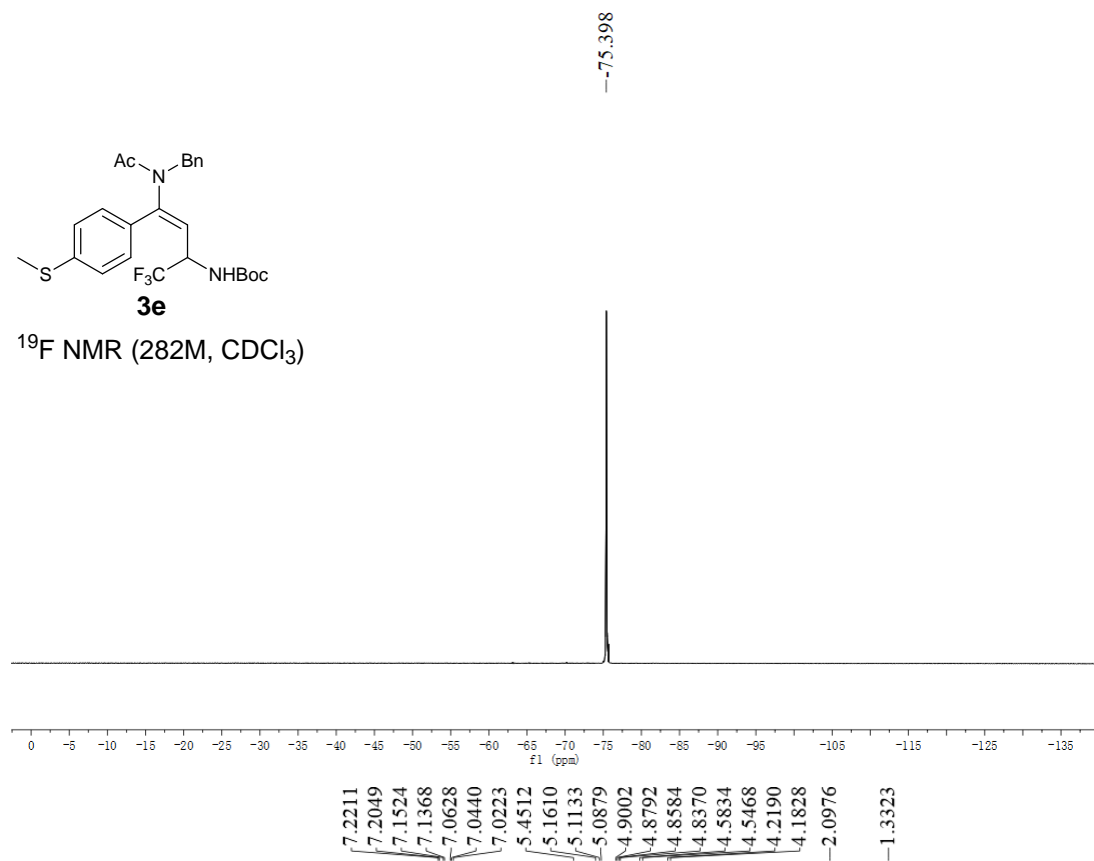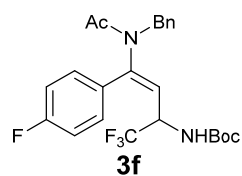

<sup>1</sup>H NMR (400M, CDCl<sub>3</sub>)

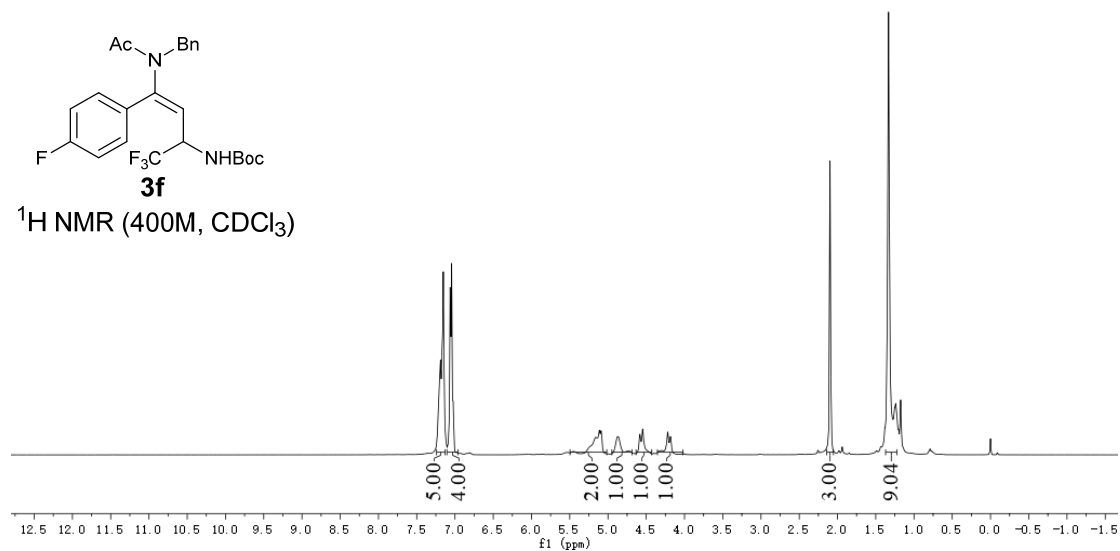

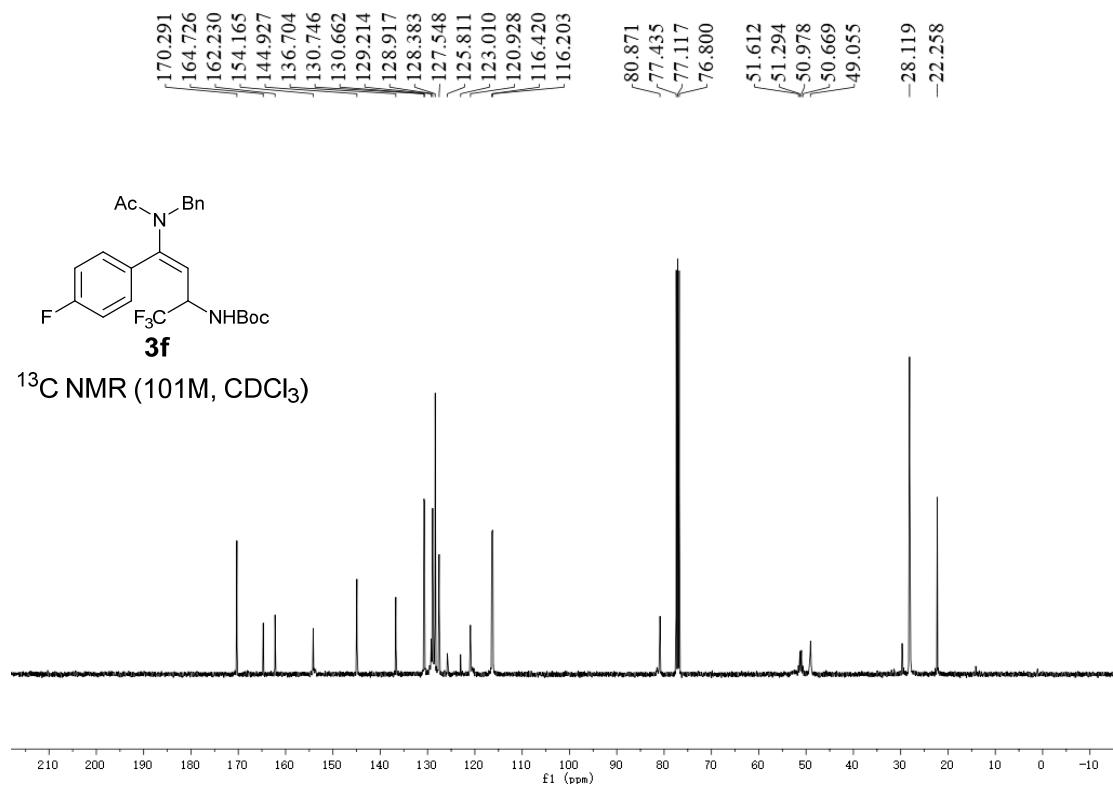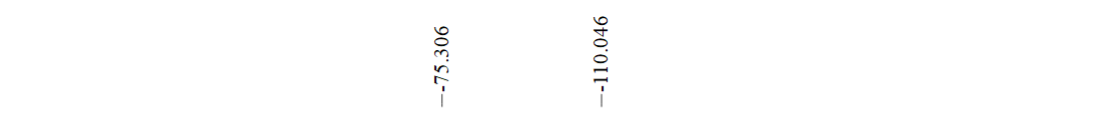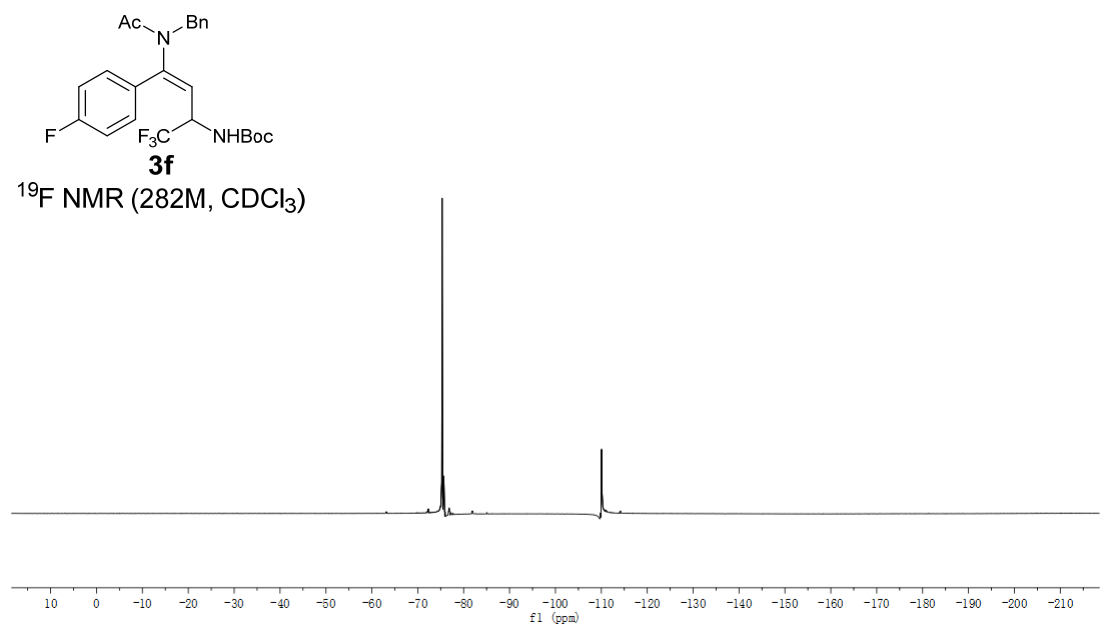

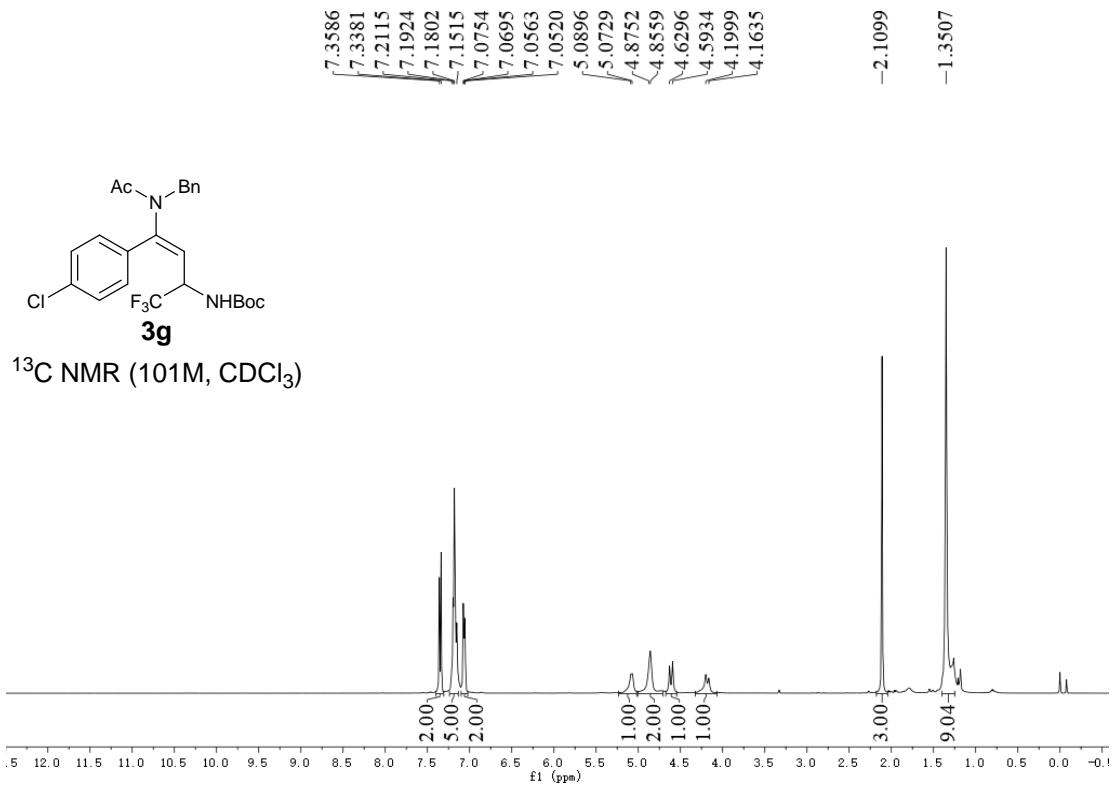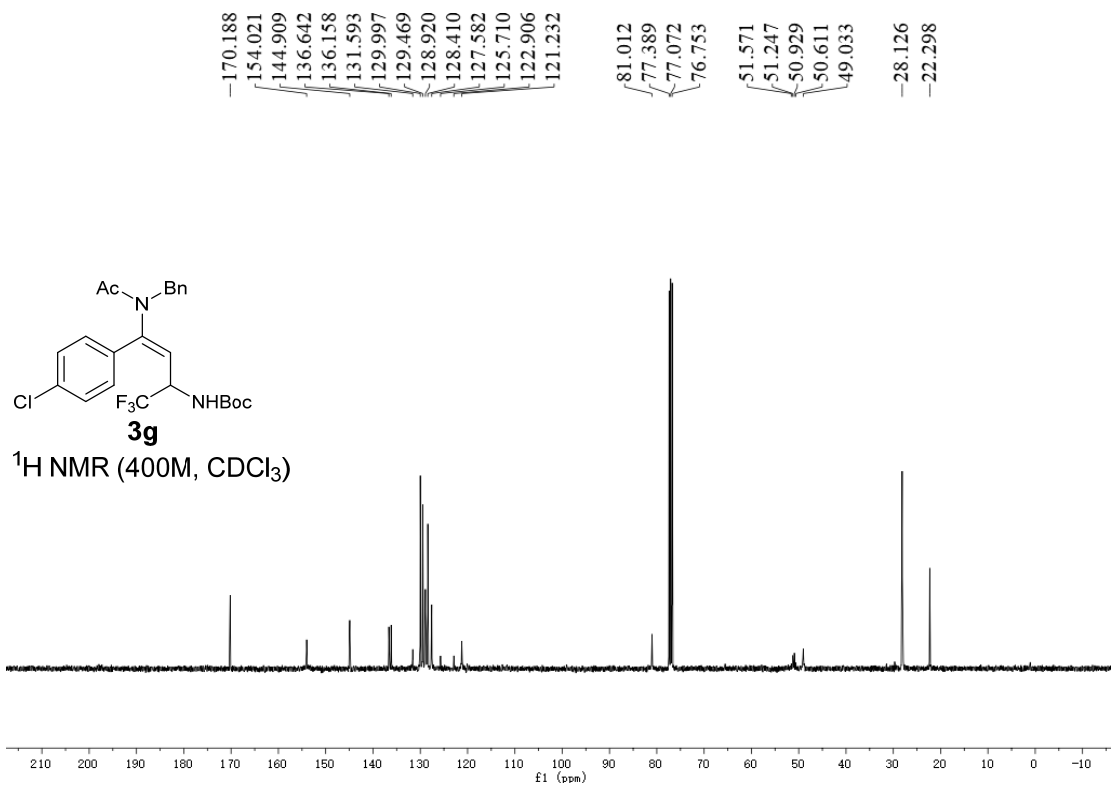



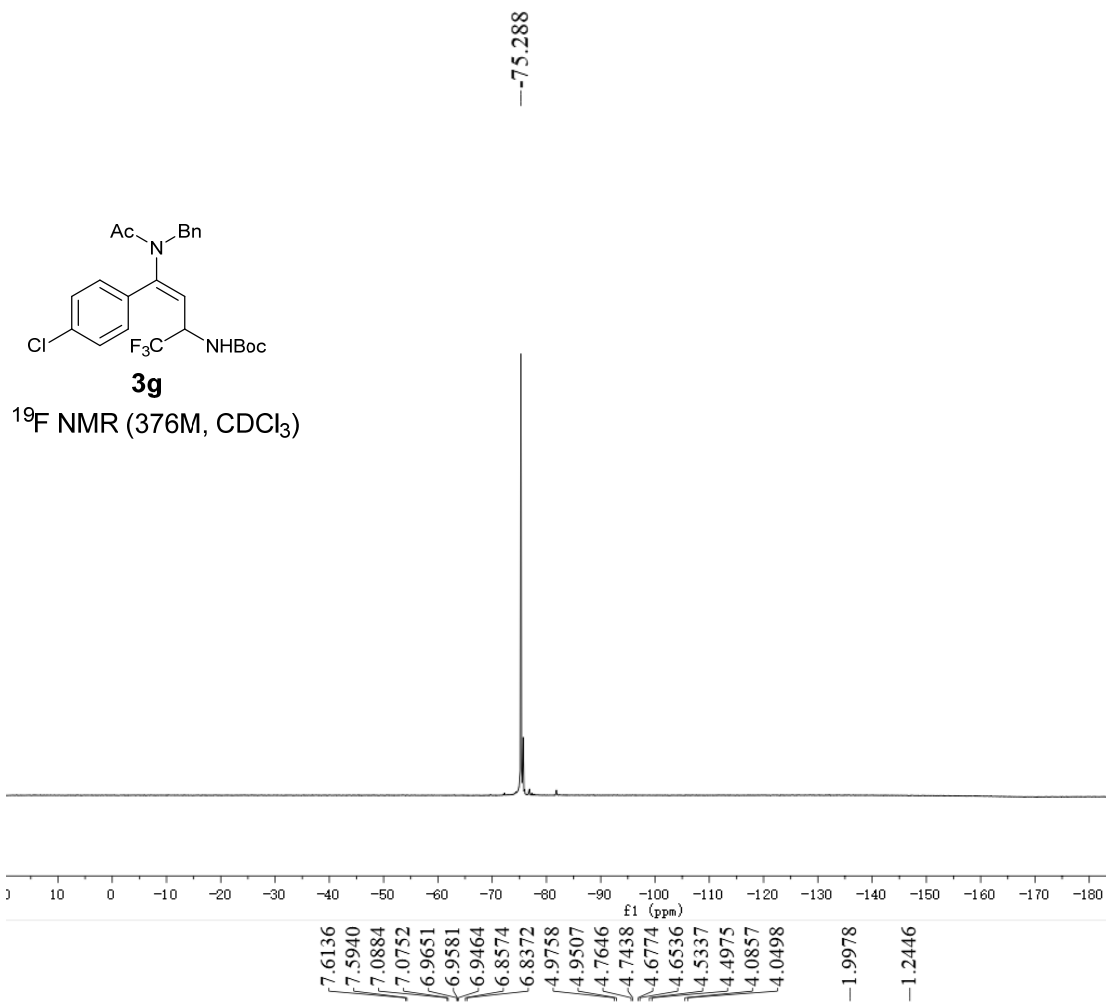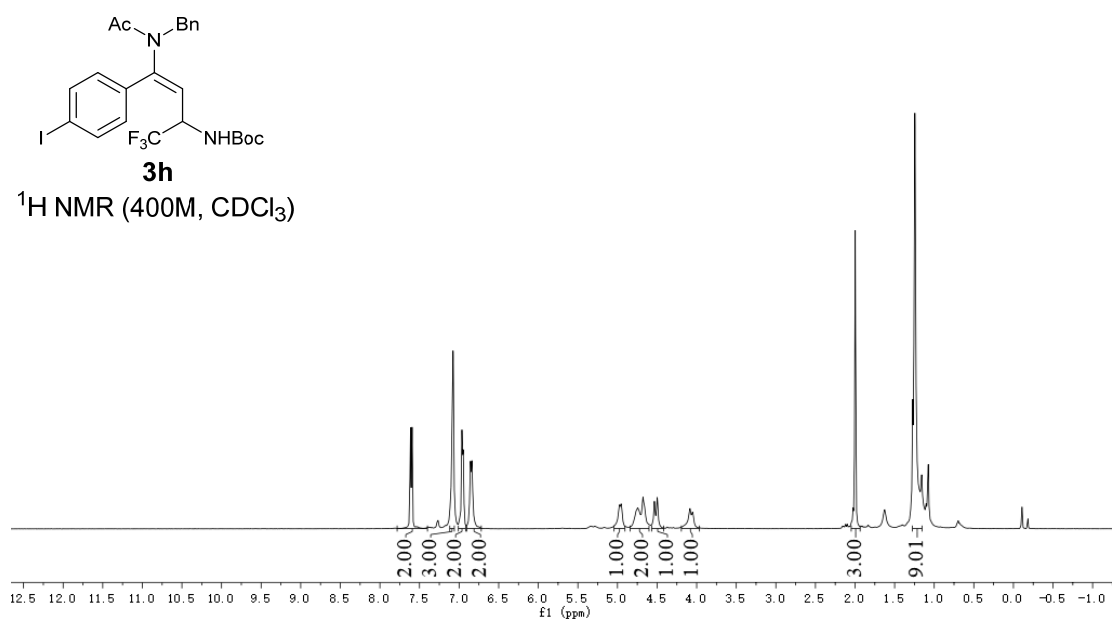

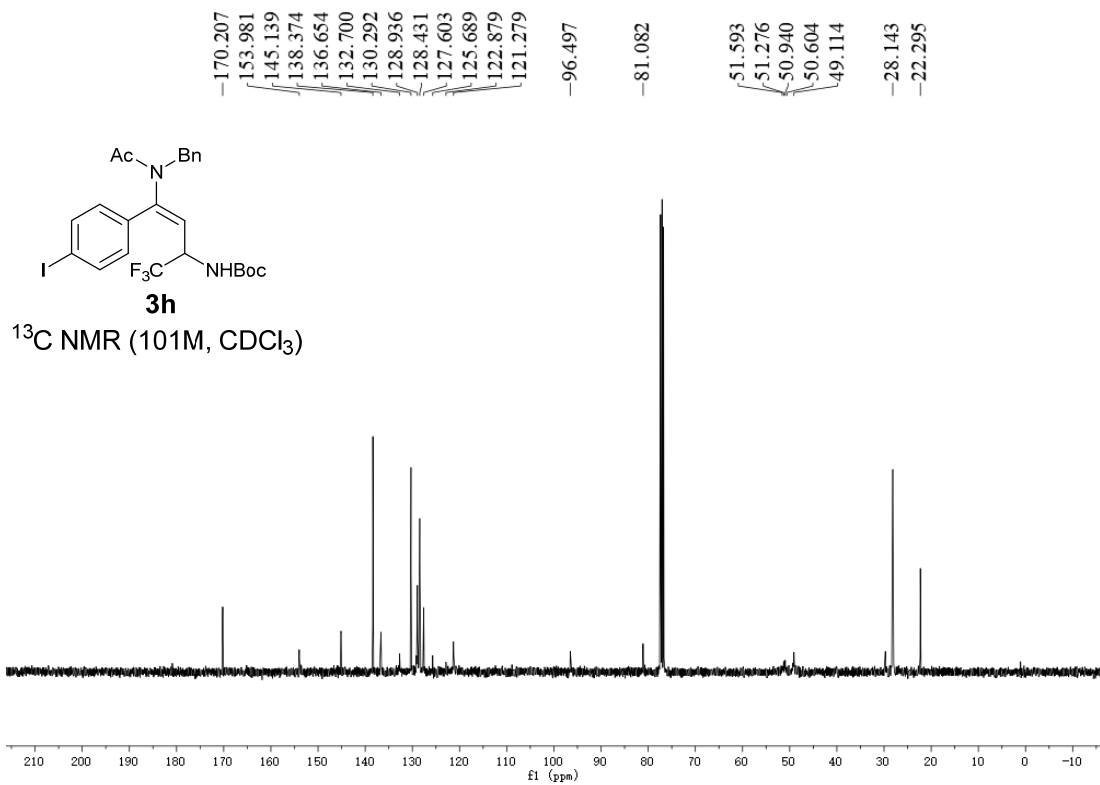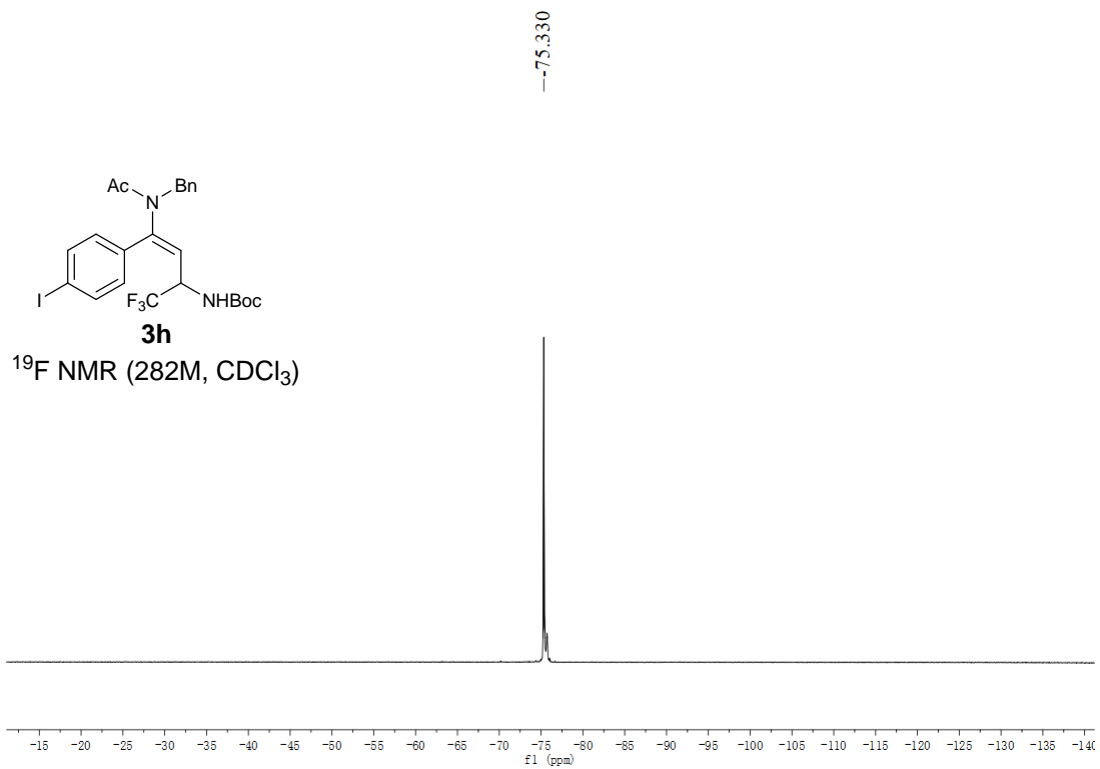

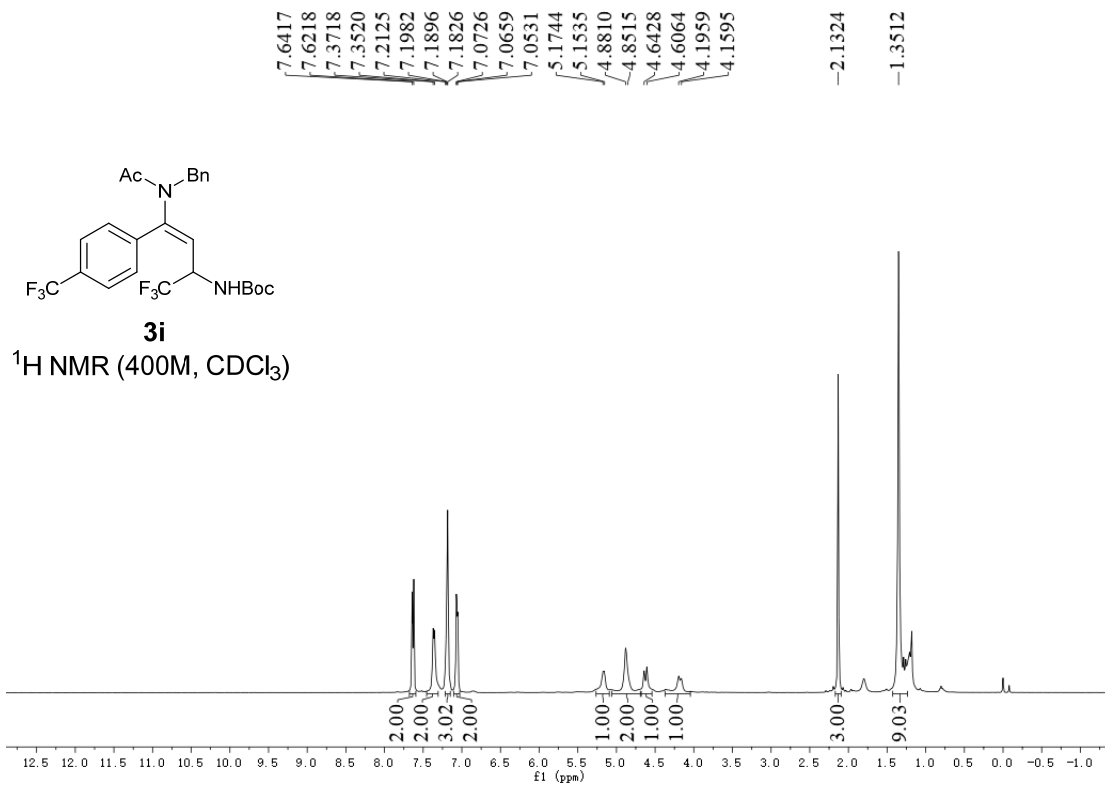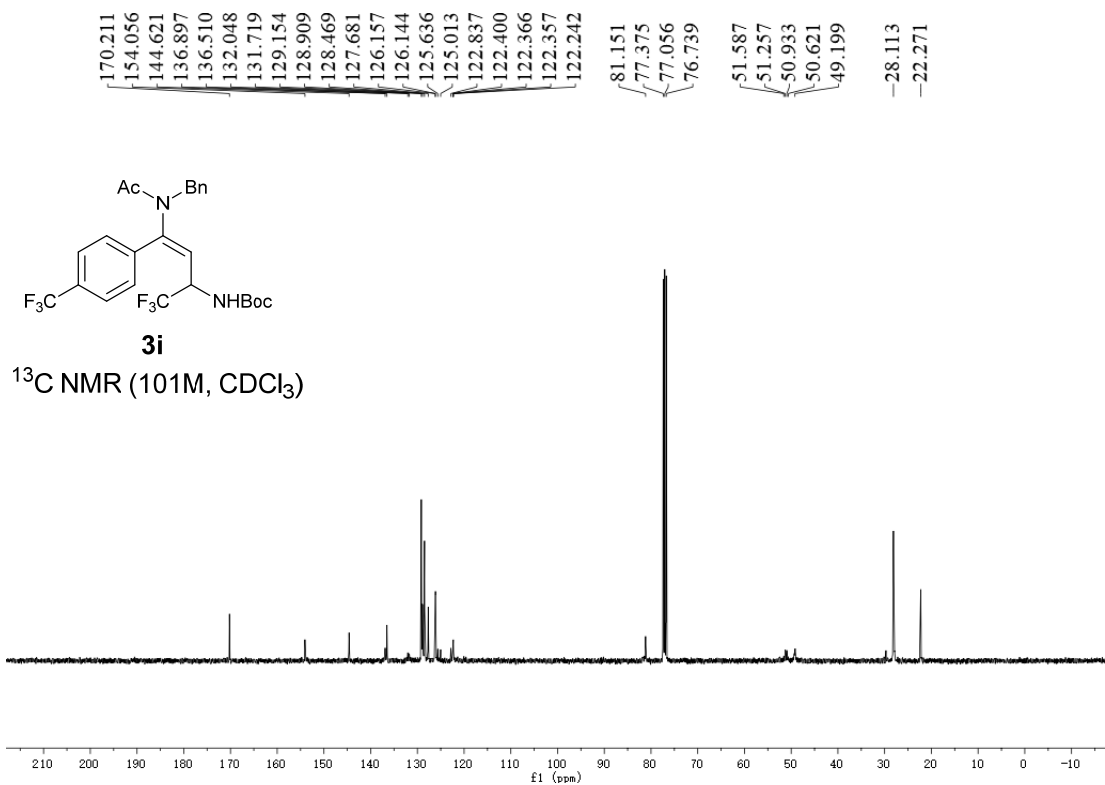

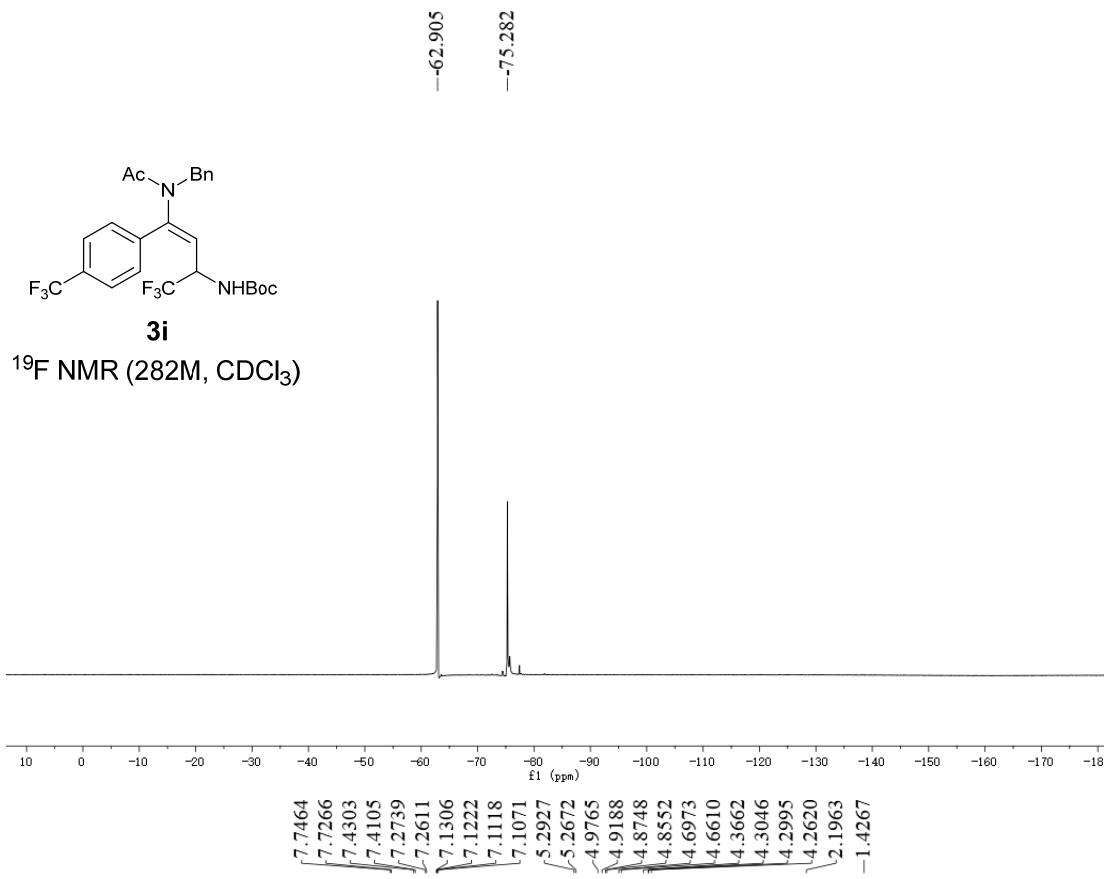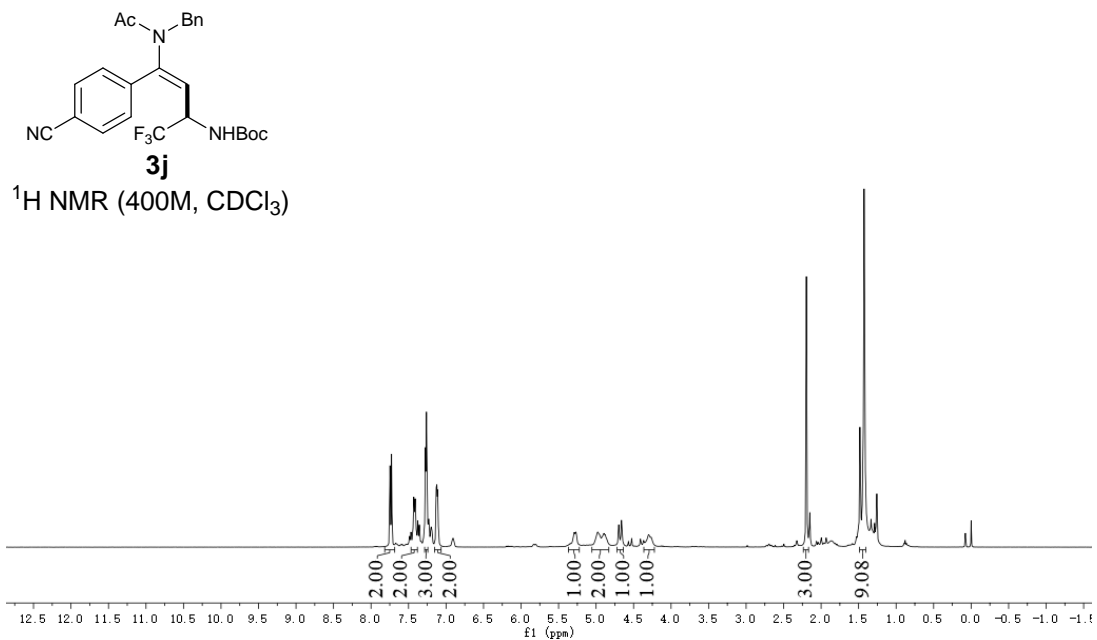

-170.098  
 154.019  
 144.308  
 136.323  
 132.838  
 132.103  
 129.430  
 128.838  
 128.740  
 128.508  
 127.749  
 126.566  
 125.534  
 122.729  
 117.991  
 113.743  
 81.247  
 77.388  
 77.070  
 76.753  
 51.519  
 51.214  
 50.900  
 50.601  
 49.861  
 -28.107  
 -22.279

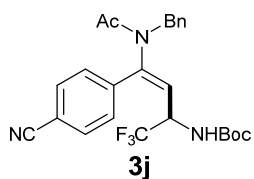

<sup>13</sup>C NMR (101M, CDCl<sub>3</sub>)

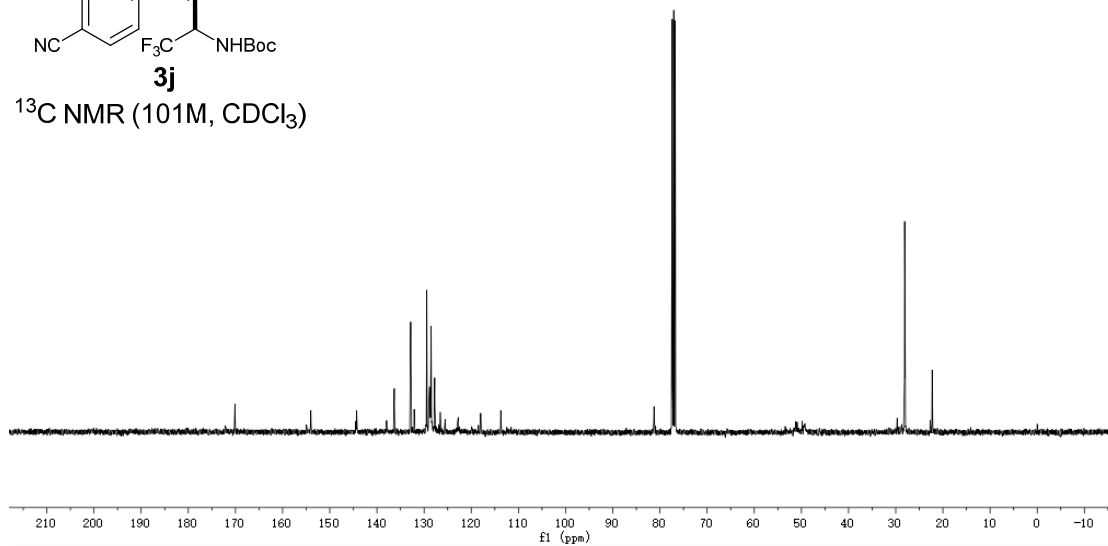

-75.126

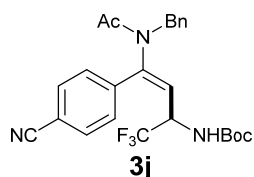

<sup>19</sup>F NMR (282M, CDCl<sub>3</sub>)

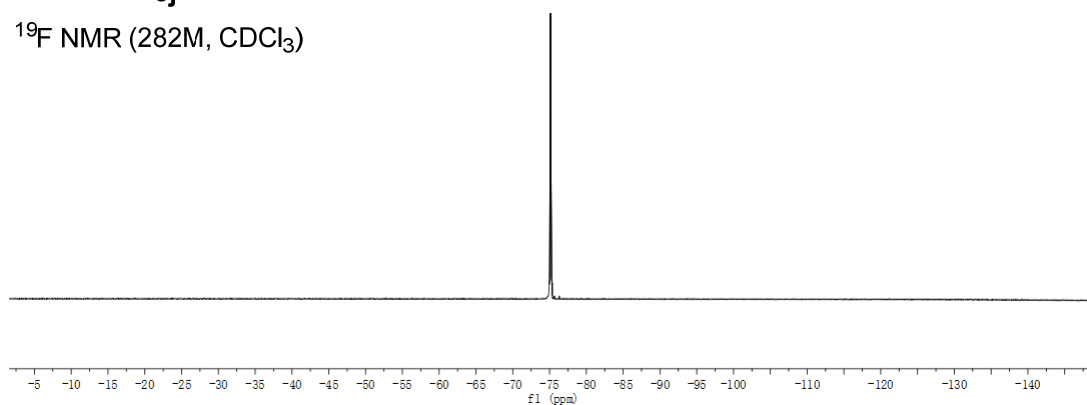

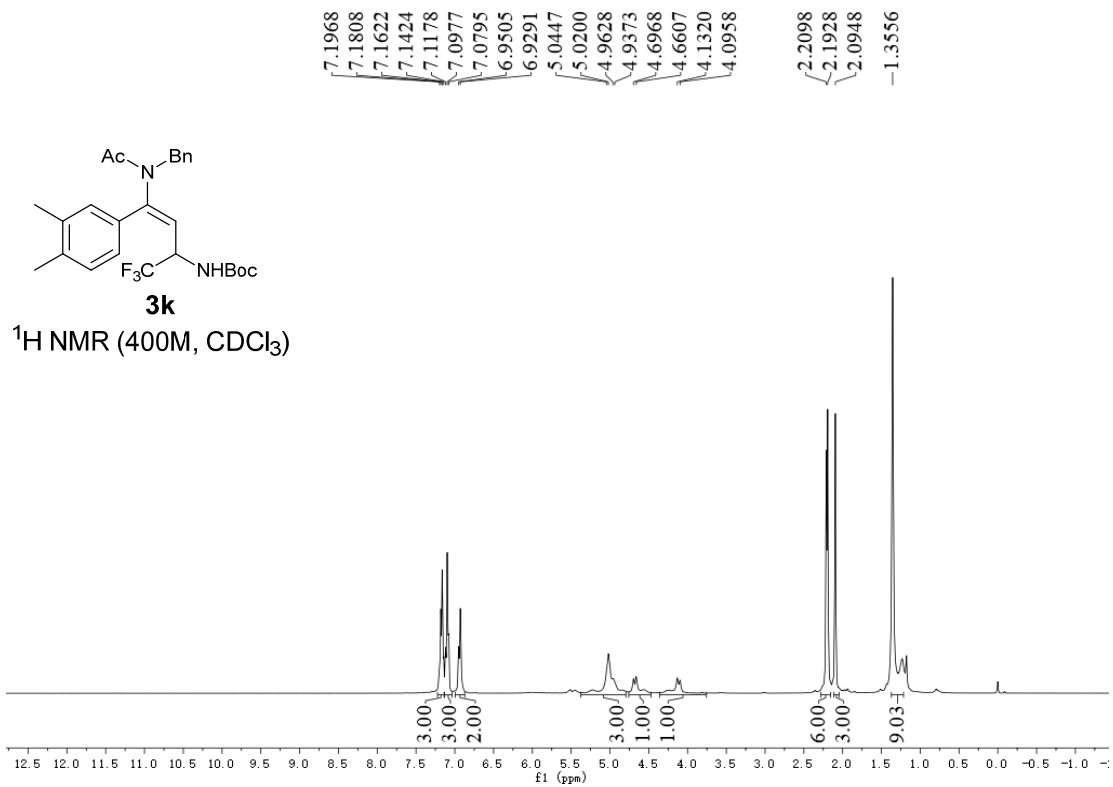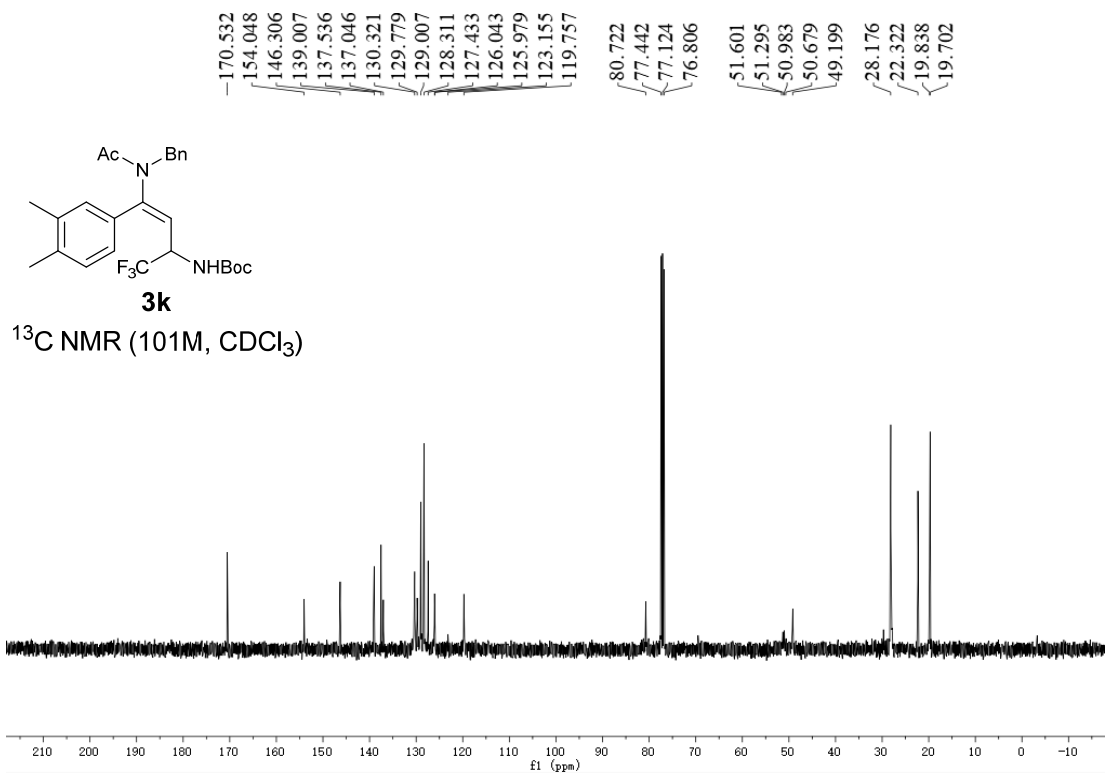

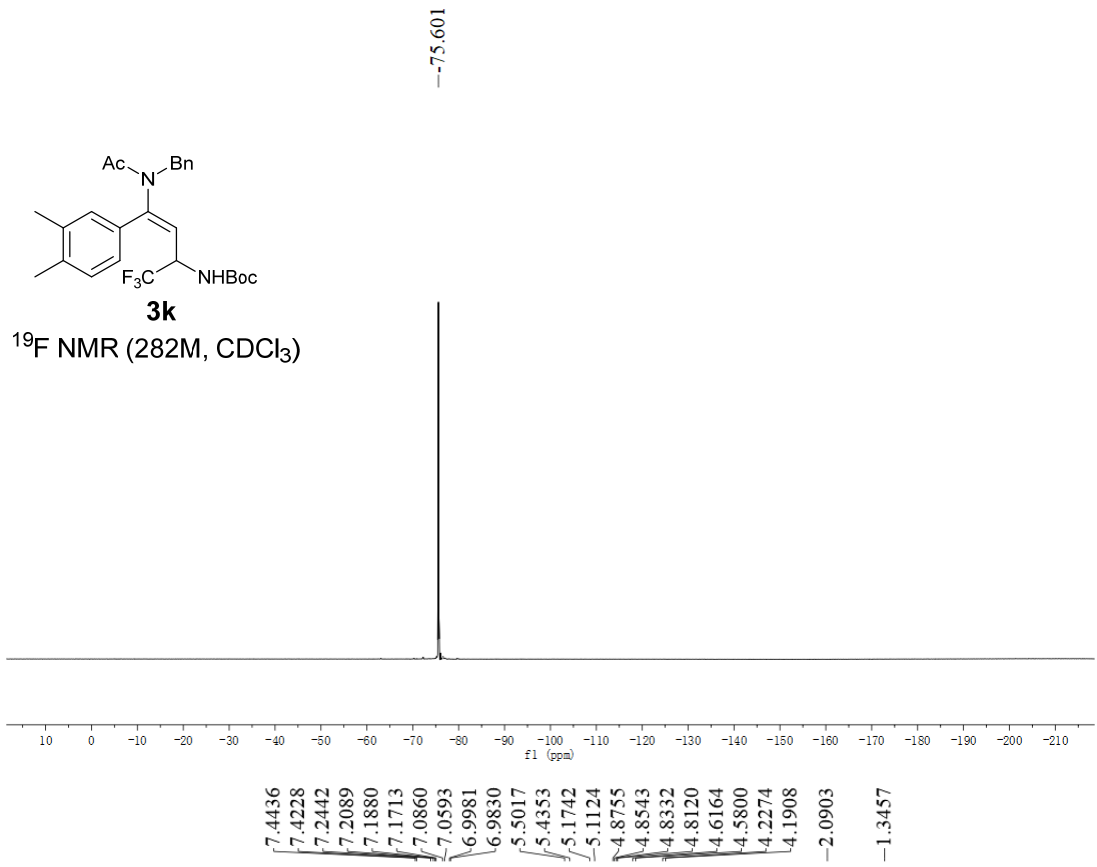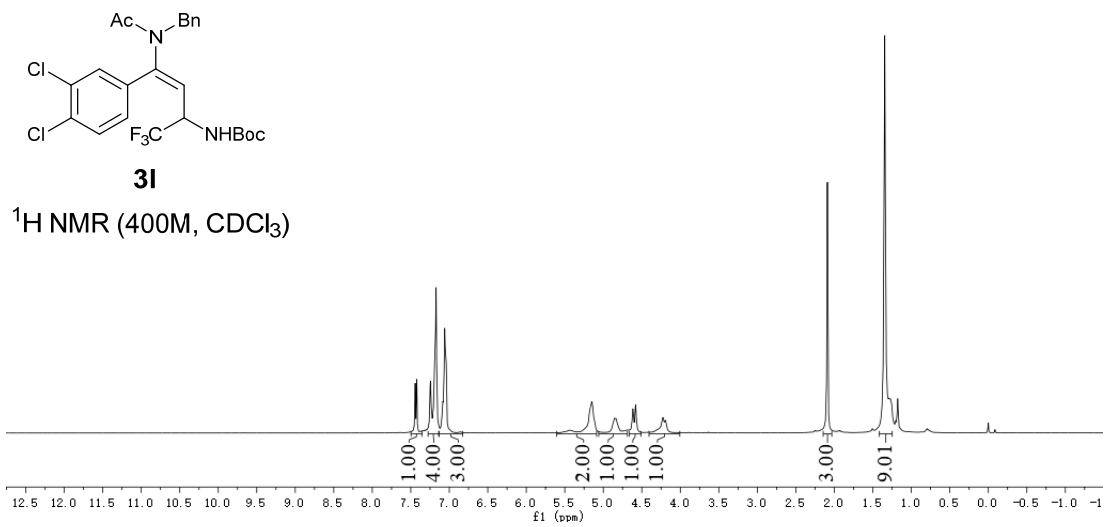

170.232  
 154.074  
 143.831  
 136.440  
 134.469  
 133.603  
 133.244  
 131.150  
 130.455  
 128.894  
 128.479  
 128.003  
 127.716  
 125.674  
 122.874  
 122.144  
 81.108  
 77.442  
 77.123  
 76.804  
 51.536  
 51.215  
 50.898  
 50.584  
 49.286  
 28.145  
 22.290

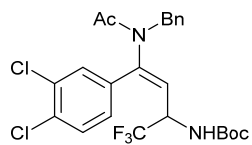

**3I**

$^{13}\text{C}$  NMR (101M,  $\text{CDCl}_3$ )

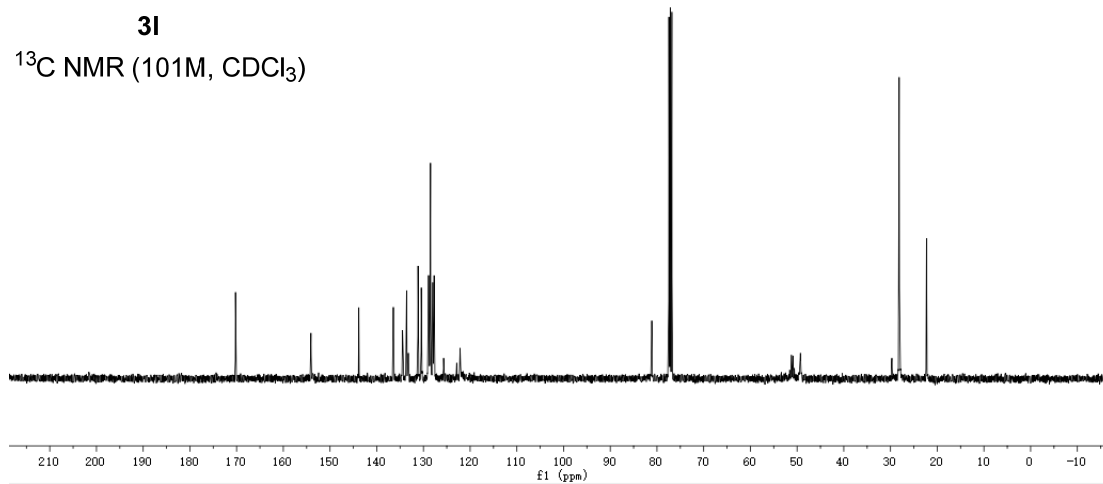

--75.230

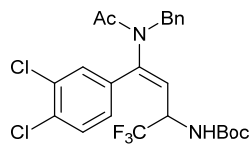

**3I**

$^{19}\text{F}$  NMR (282M,  $\text{CDCl}_3$ )

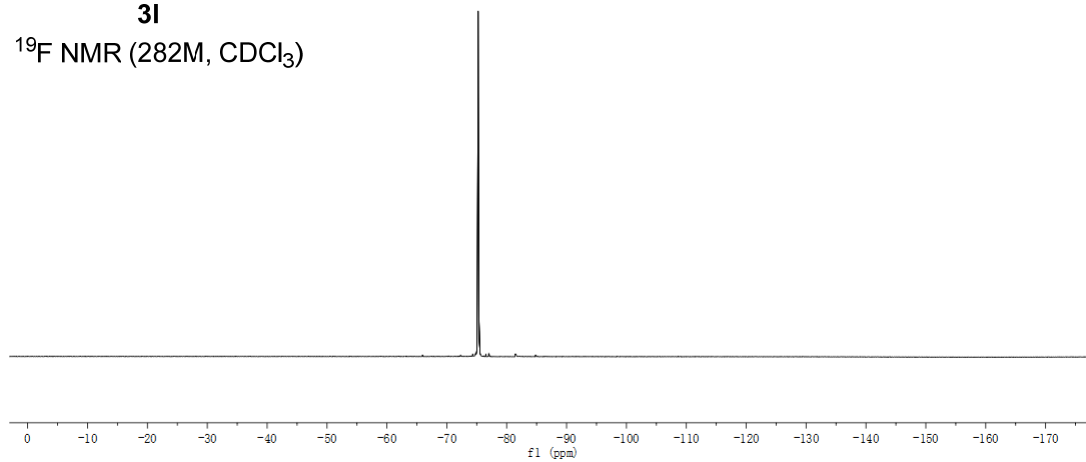



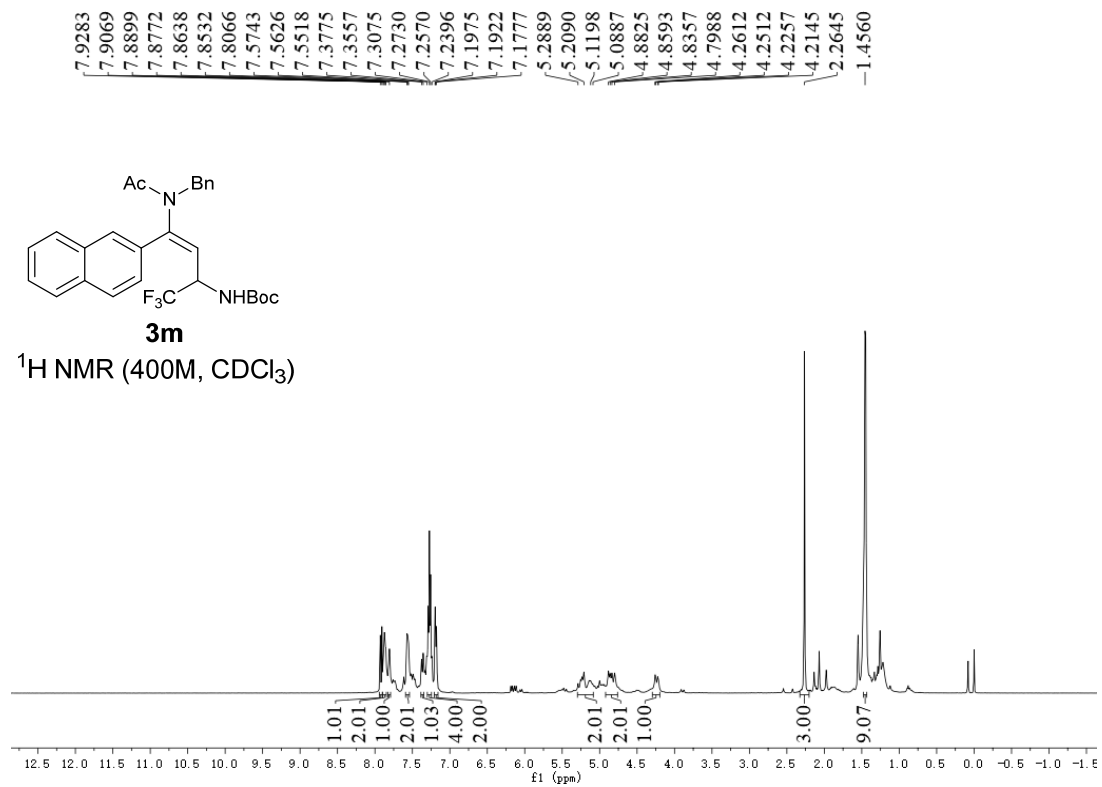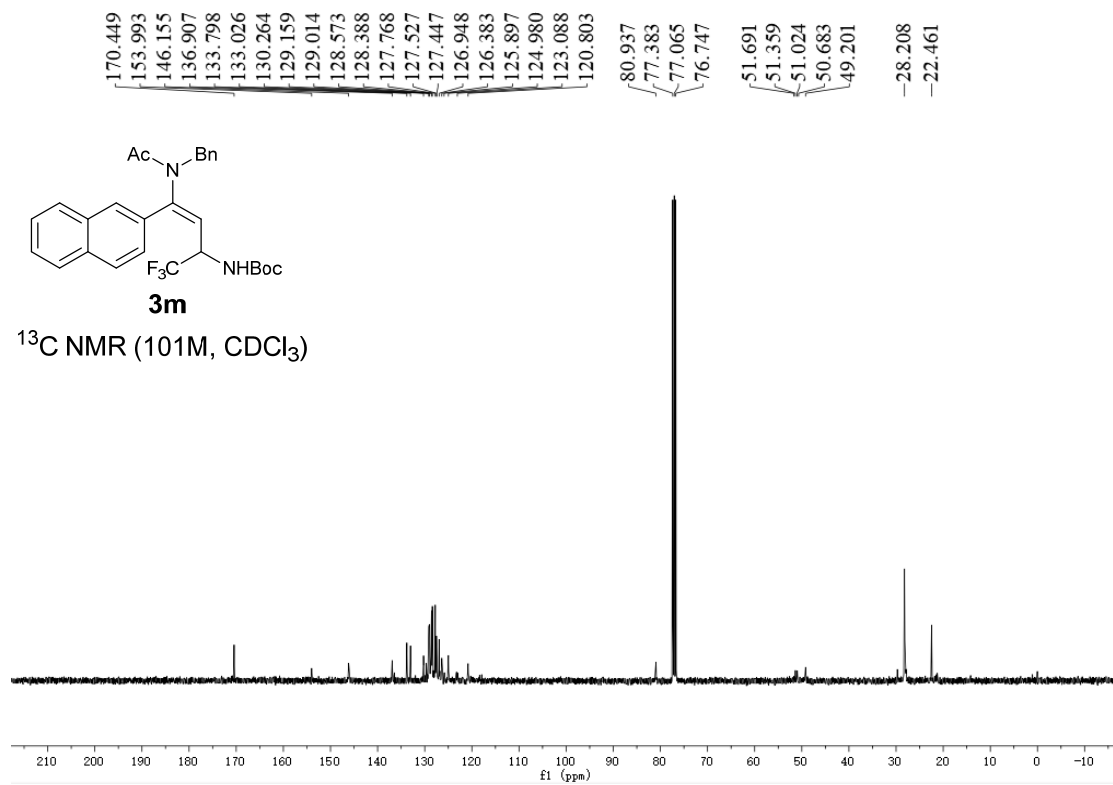

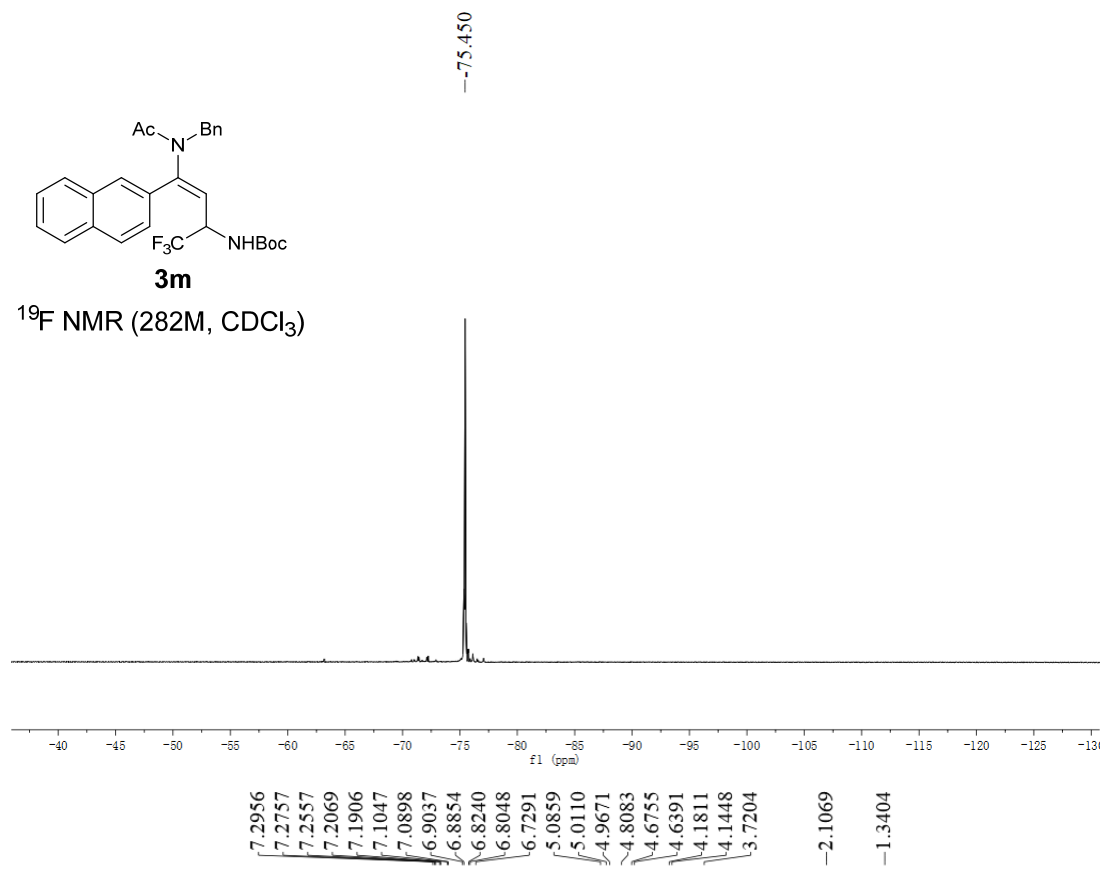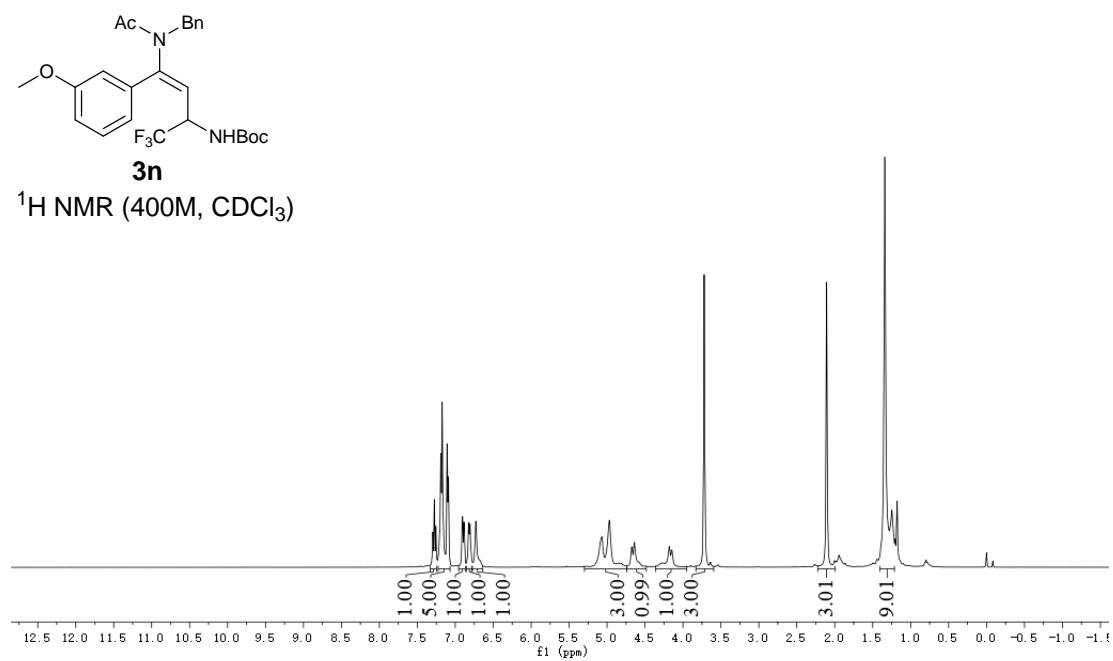

170.311  
159.976  
154.052  
145.912  
136.929  
134.469  
130.208  
128.986  
128.333  
127.465  
125.857  
123.050  
120.877  
120.558  
115.938  
113.909  
80.798  
77.406  
77.088  
76.771  
55.284  
51.543  
51.262  
50.947  
50.627  
49.150  
-28.128  
-22.301

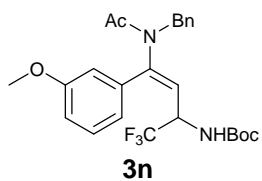

<sup>13</sup>C NMR (101M, CDCl<sub>3</sub>)

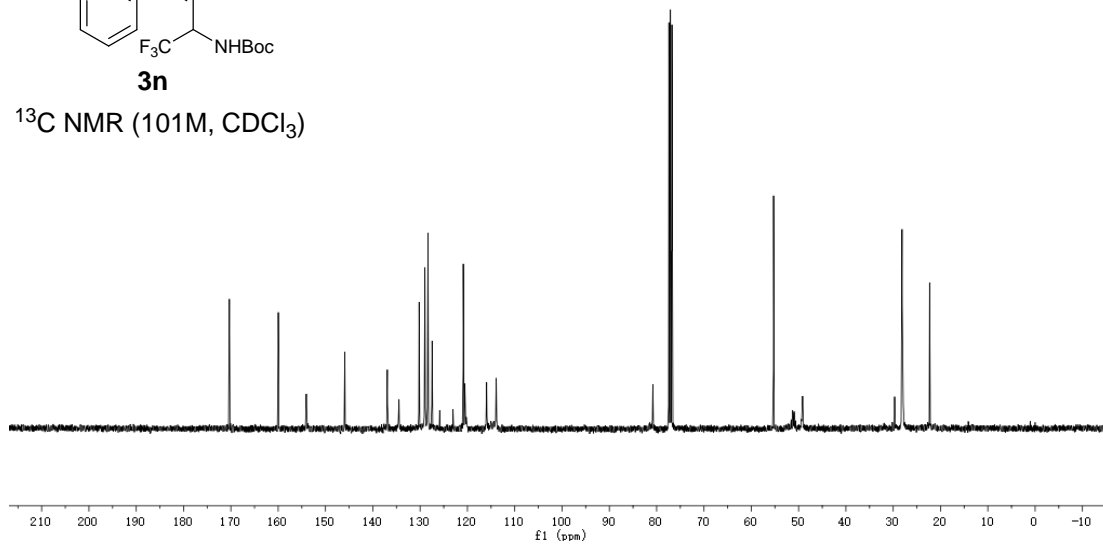

--75.422

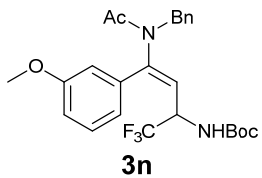

<sup>19</sup>F NMR (376M, CDCl<sub>3</sub>)

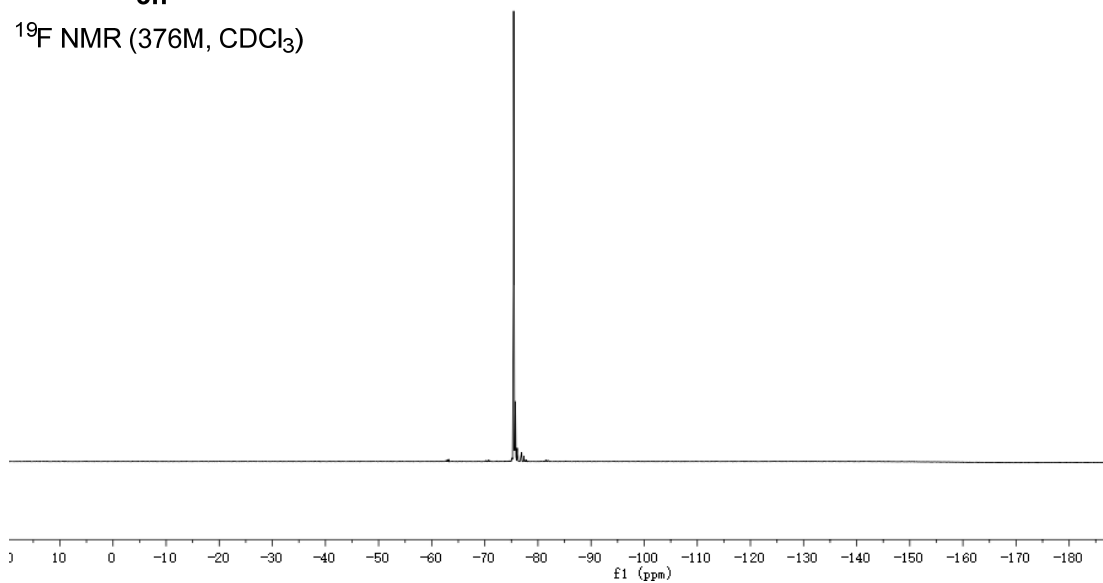

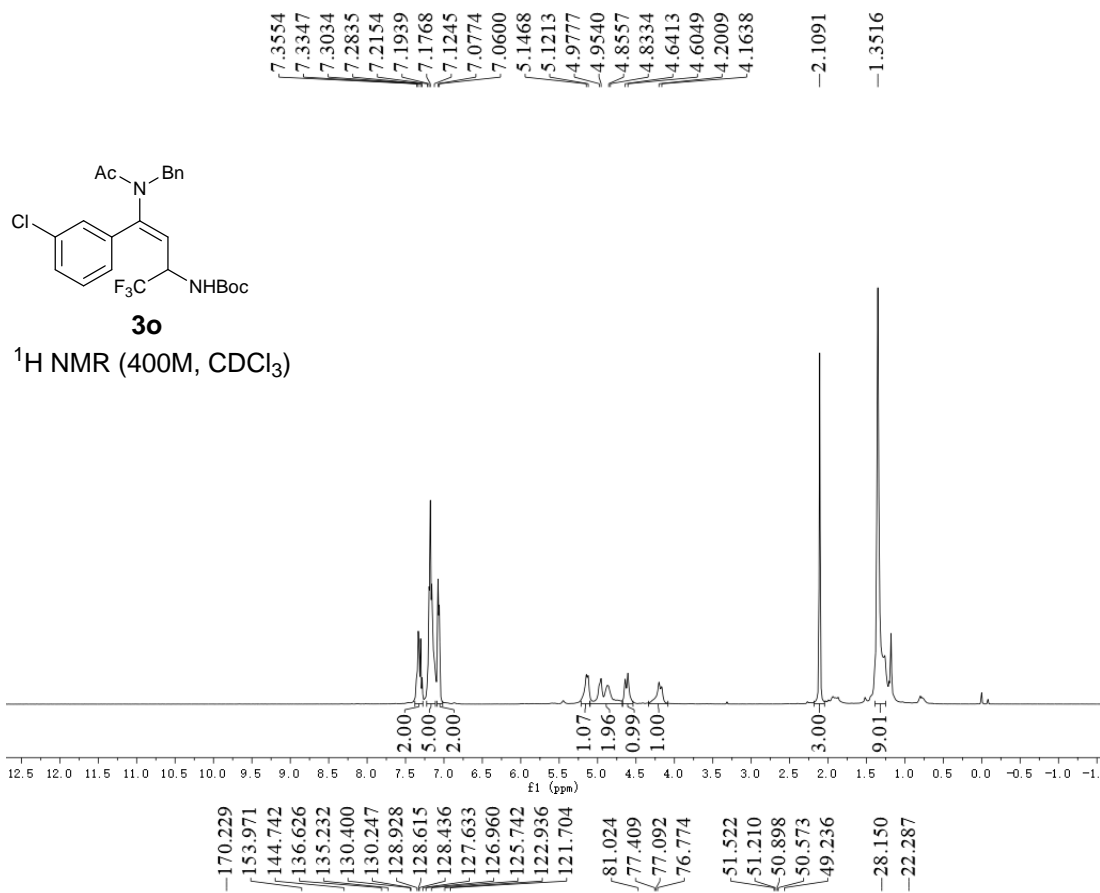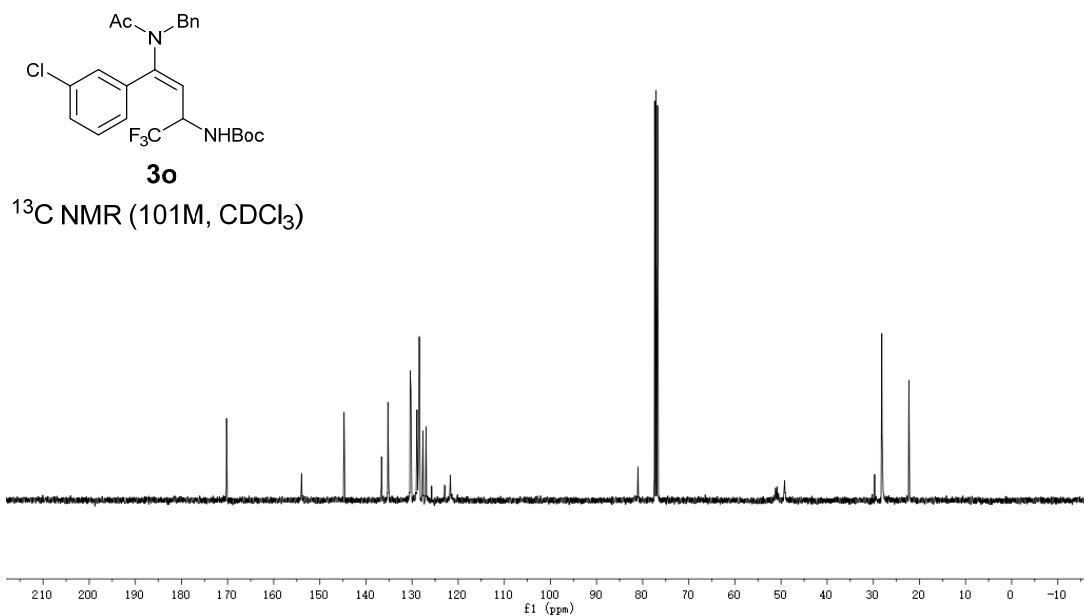

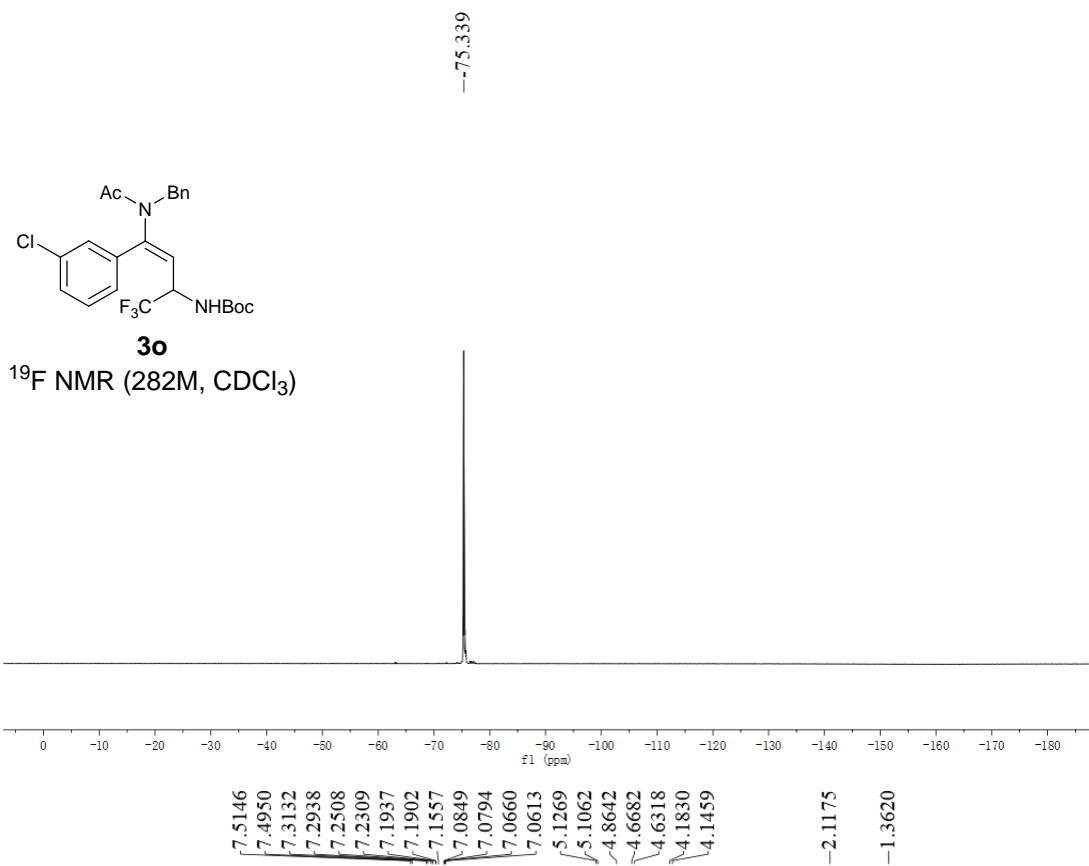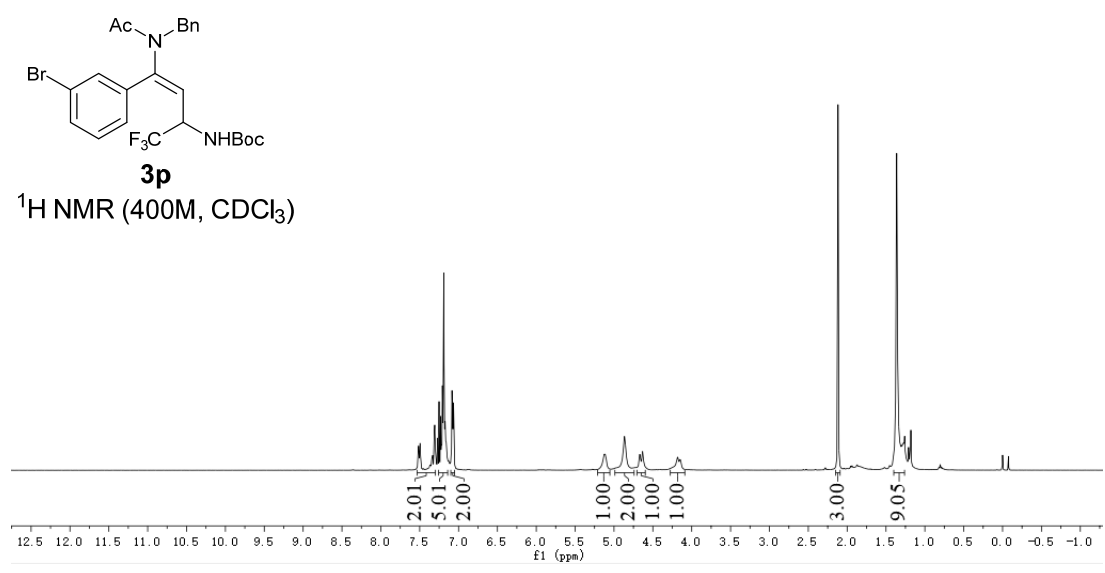

-170.259  
 153.952  
 144.650  
 136.606  
 135.238  
 133.191  
 131.455  
 130.622  
 128.929  
 128.445  
 127.646  
 127.436  
 125.728  
 123.292  
 122.927  
 121.696  
 81.060  
 77.409  
 77.092  
 76.774  
 51.527  
 51.193  
 50.869  
 50.545  
 49.216  
 -28.167  
 -22.311

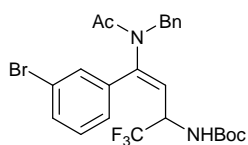

**3p**

<sup>13</sup>C NMR (101M, CDCl<sub>3</sub>)

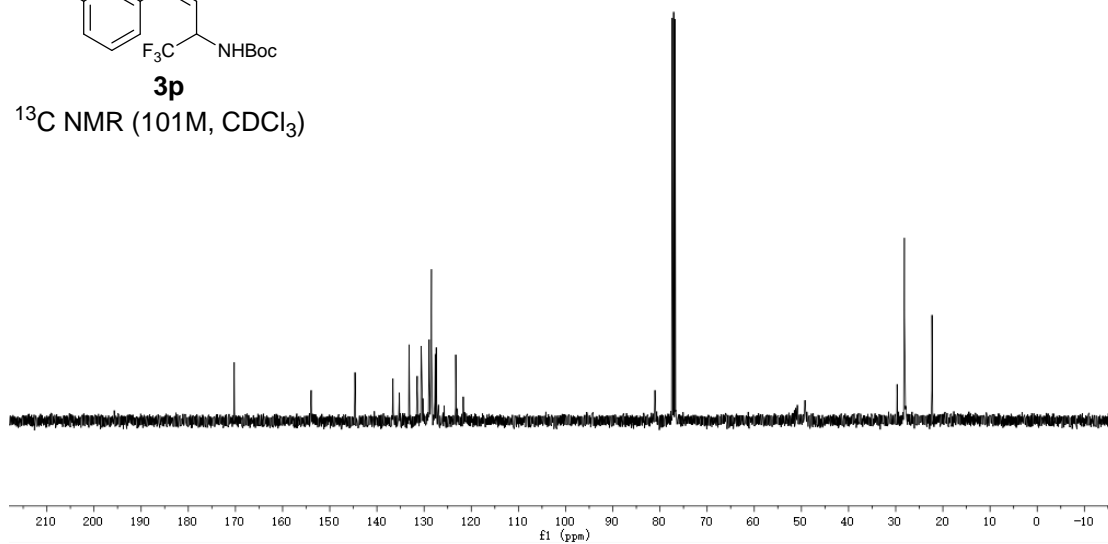

-75.373

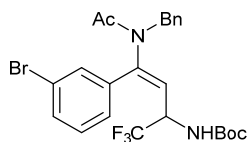

**3p**

<sup>19</sup>F NMR (282M, CDCl<sub>3</sub>)

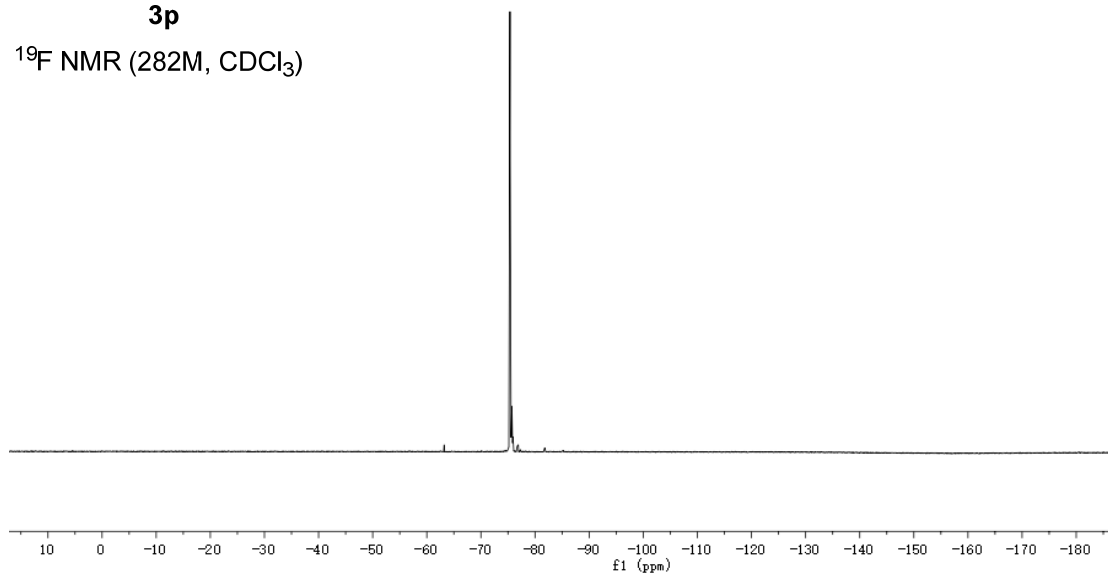

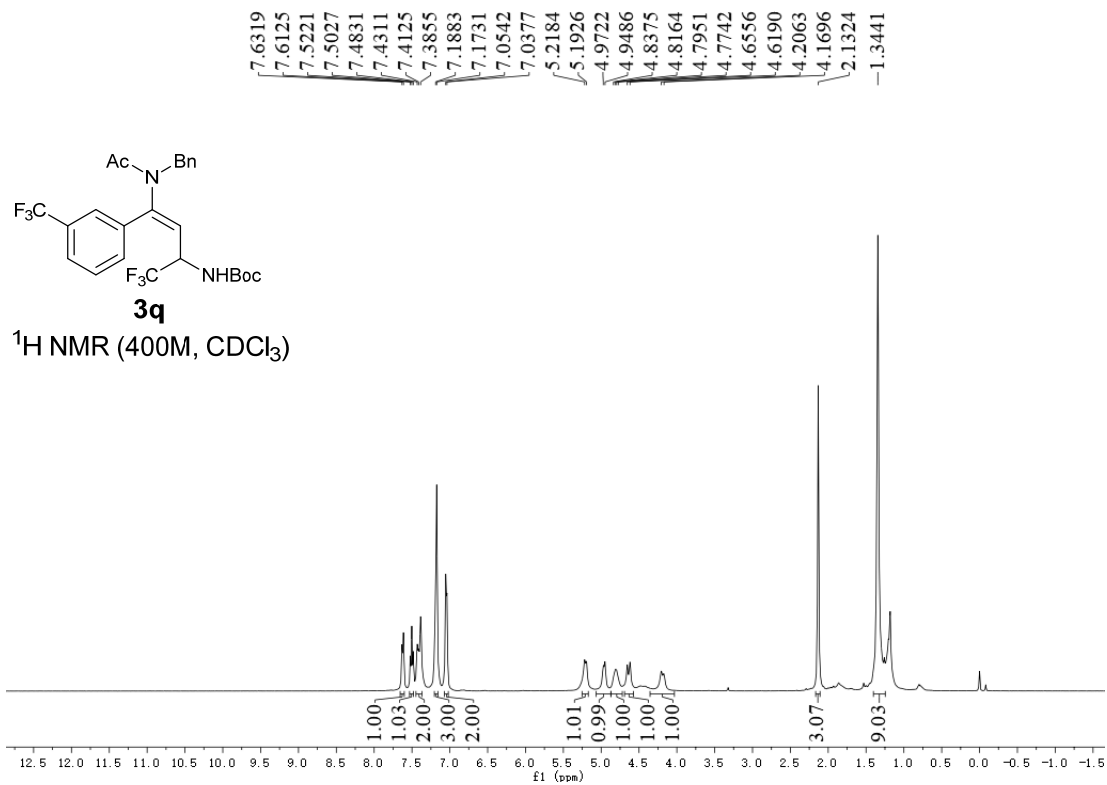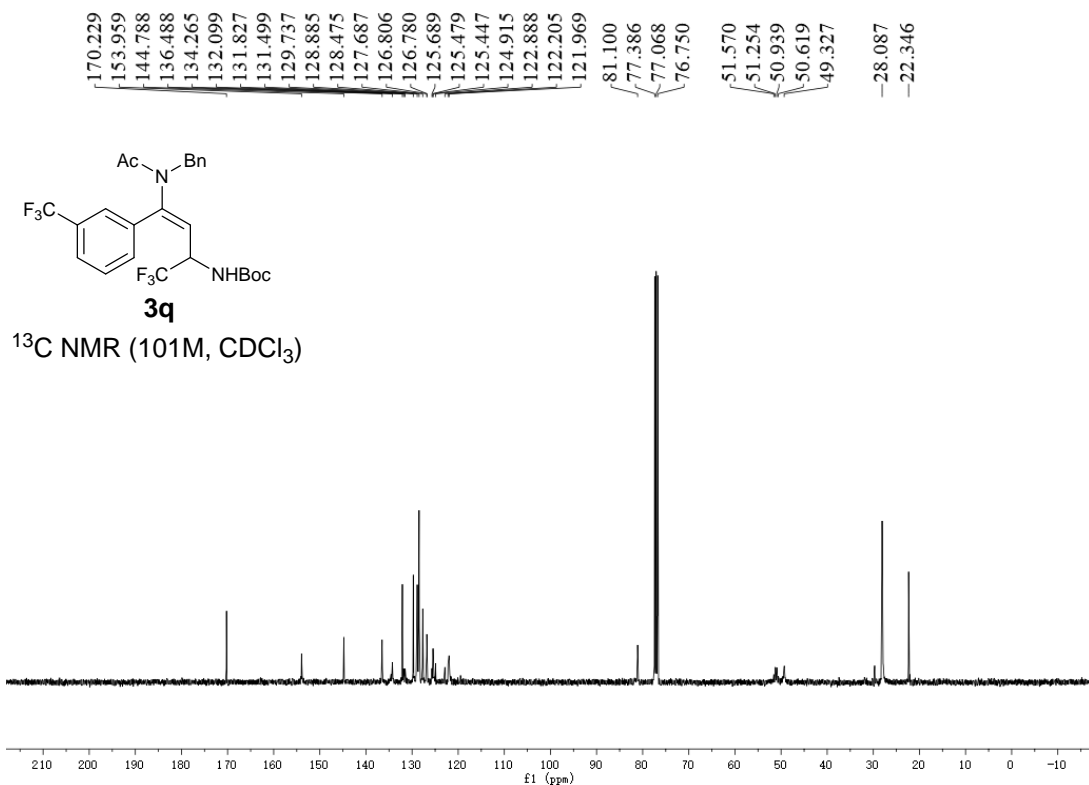

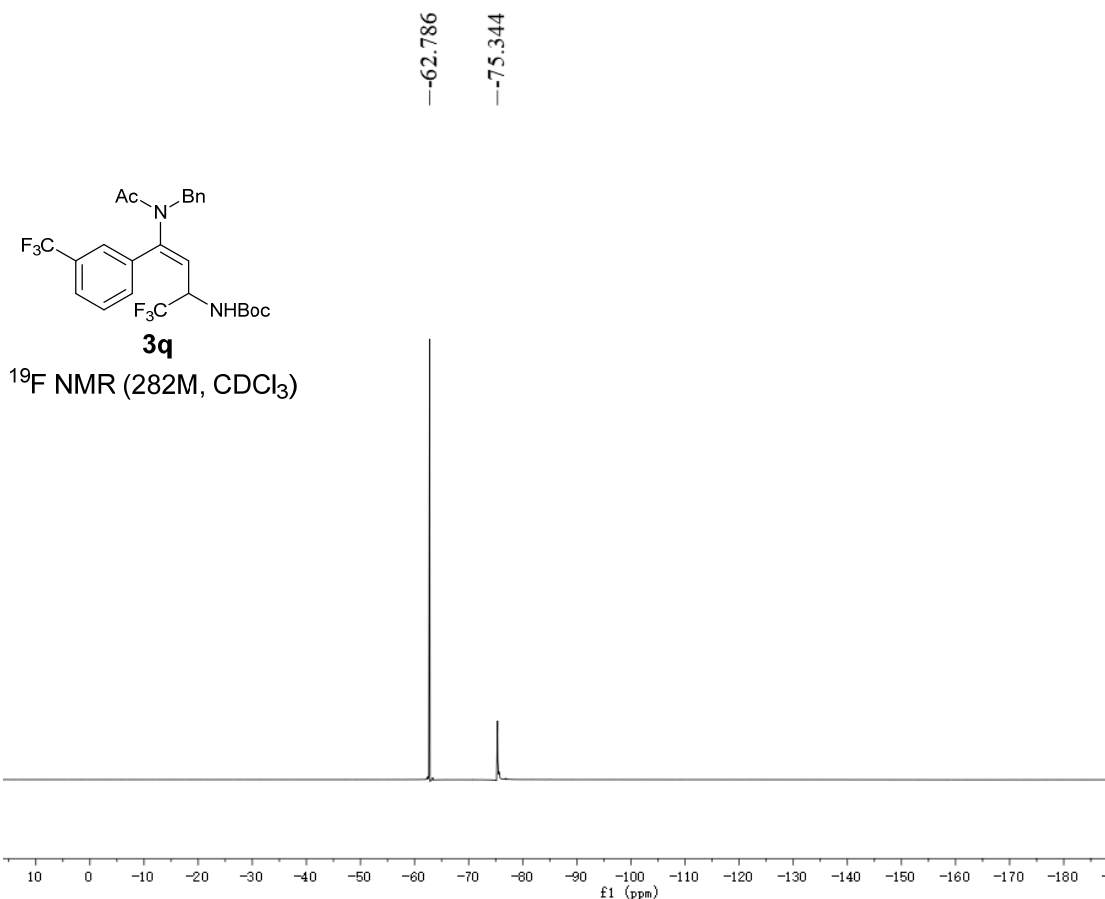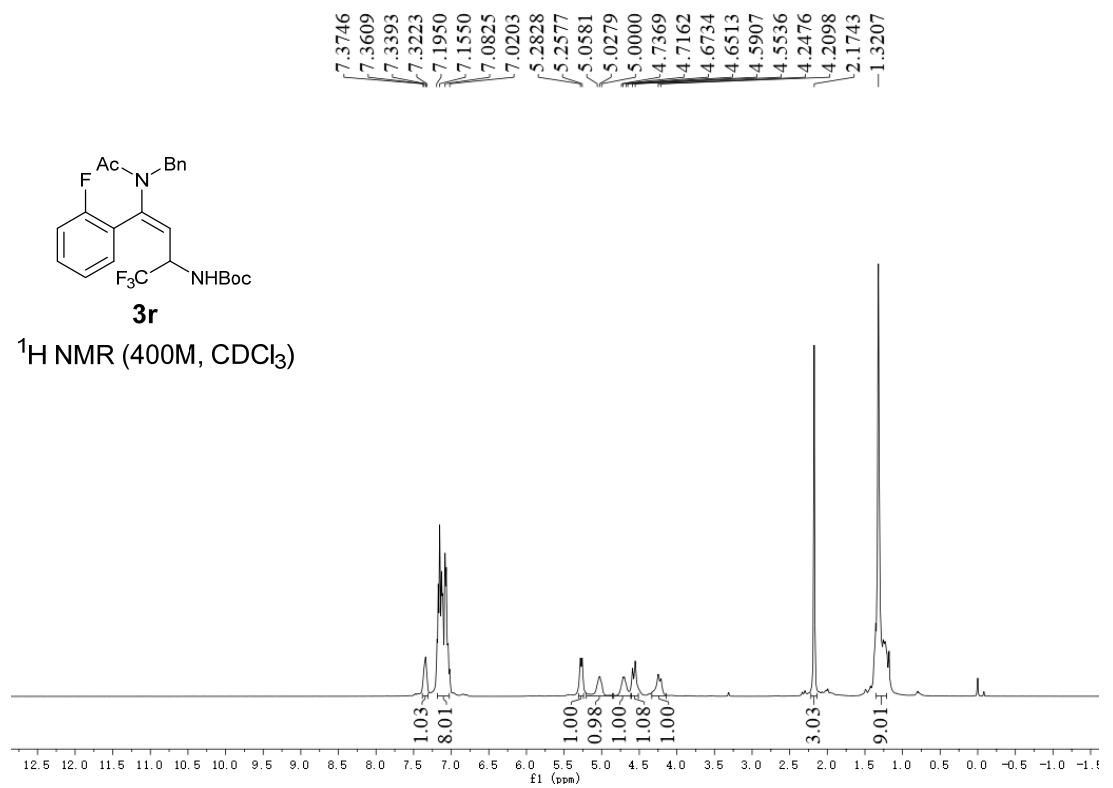



170.525  
161.554  
159.068  
154.102  
141.416  
136.881  
132.040  
131.956  
131.475  
128.585  
128.326  
127.368  
125.704  
124.604  
124.568  
122.854  
121.023  
116.605  
116.390  
80.749  
77.409  
77.090  
76.772  
51.746  
51.416  
51.095  
50.769  
48.718  
28.097  
22.268  
22.237

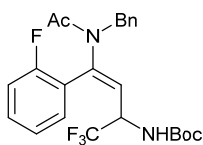

**3r**

<sup>13</sup>C NMR (101M, CDCl<sub>3</sub>)

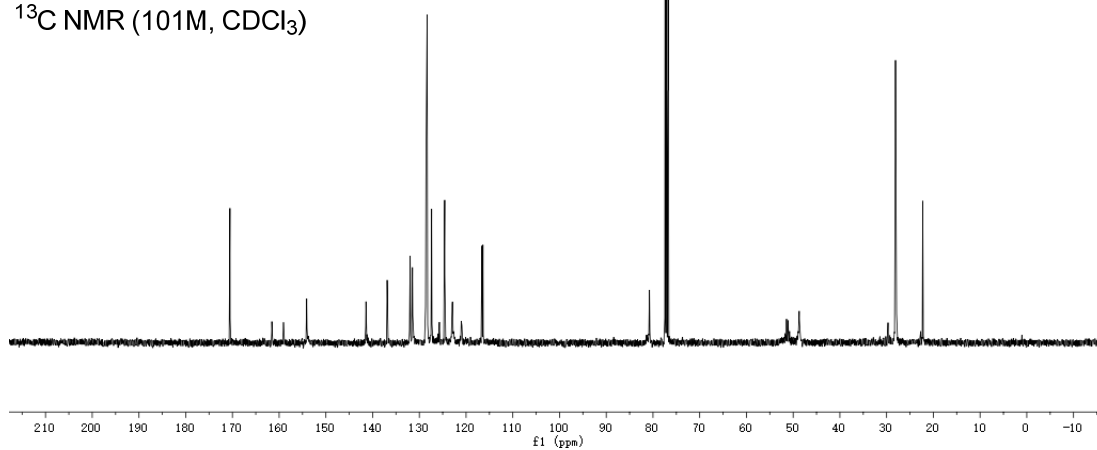

--75.535

--112.517

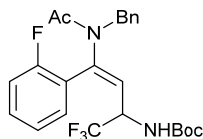

**3r**

<sup>19</sup>F NMR (282M, CDCl<sub>3</sub>)

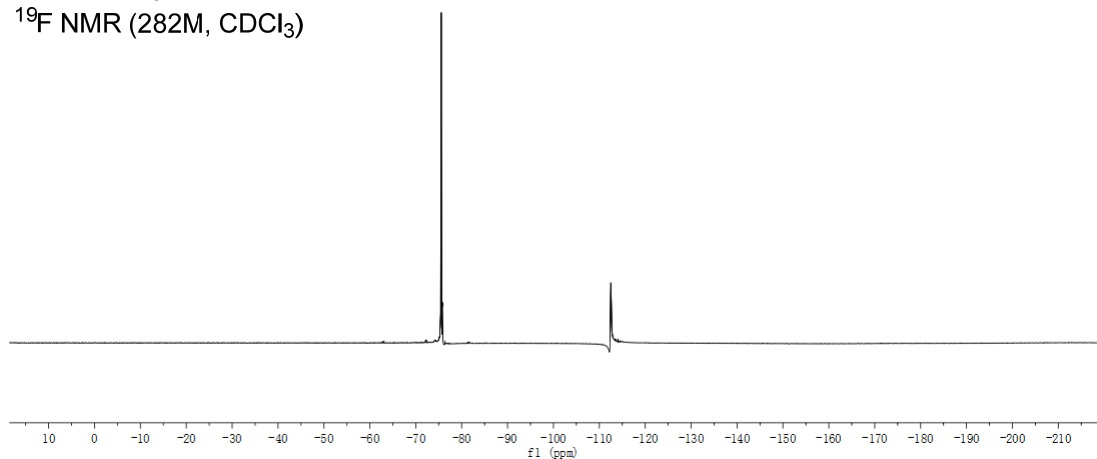

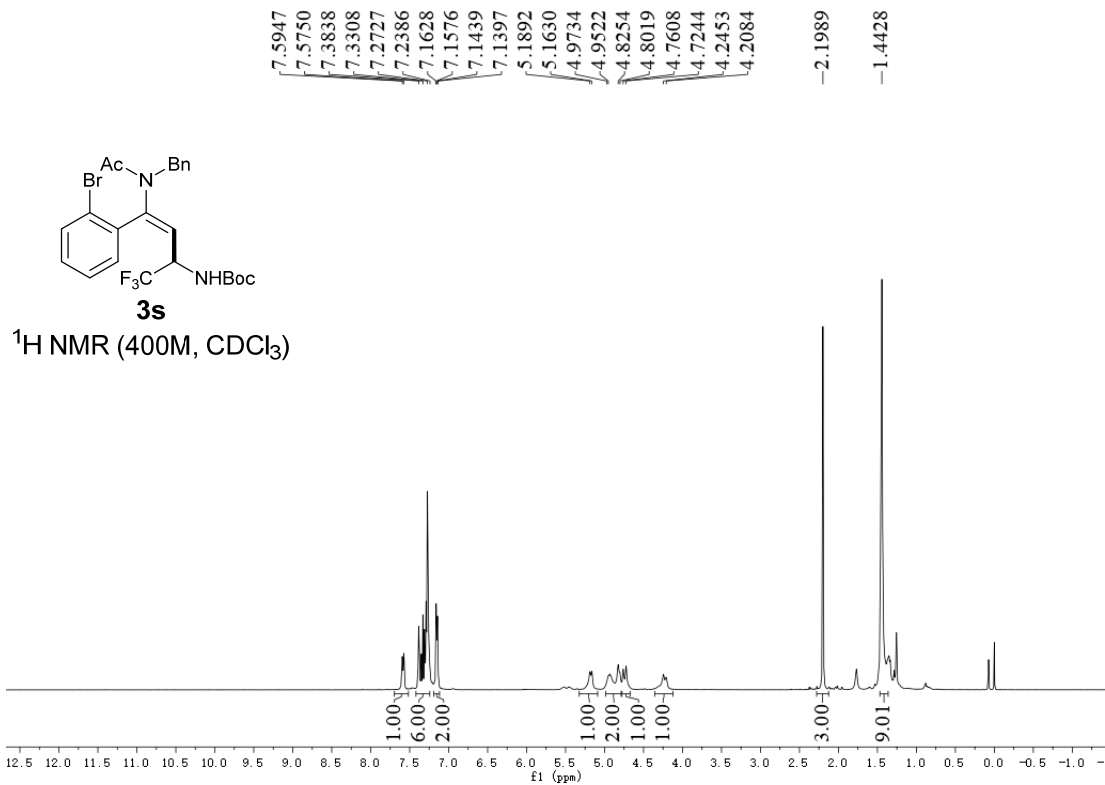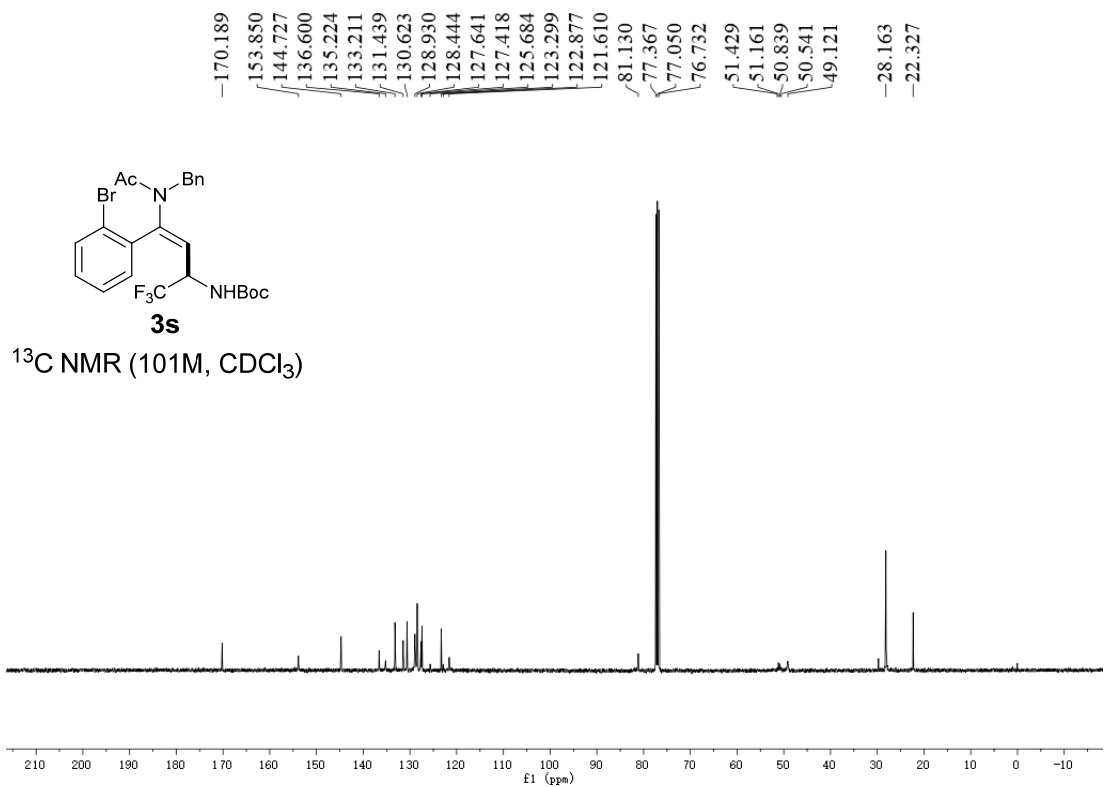

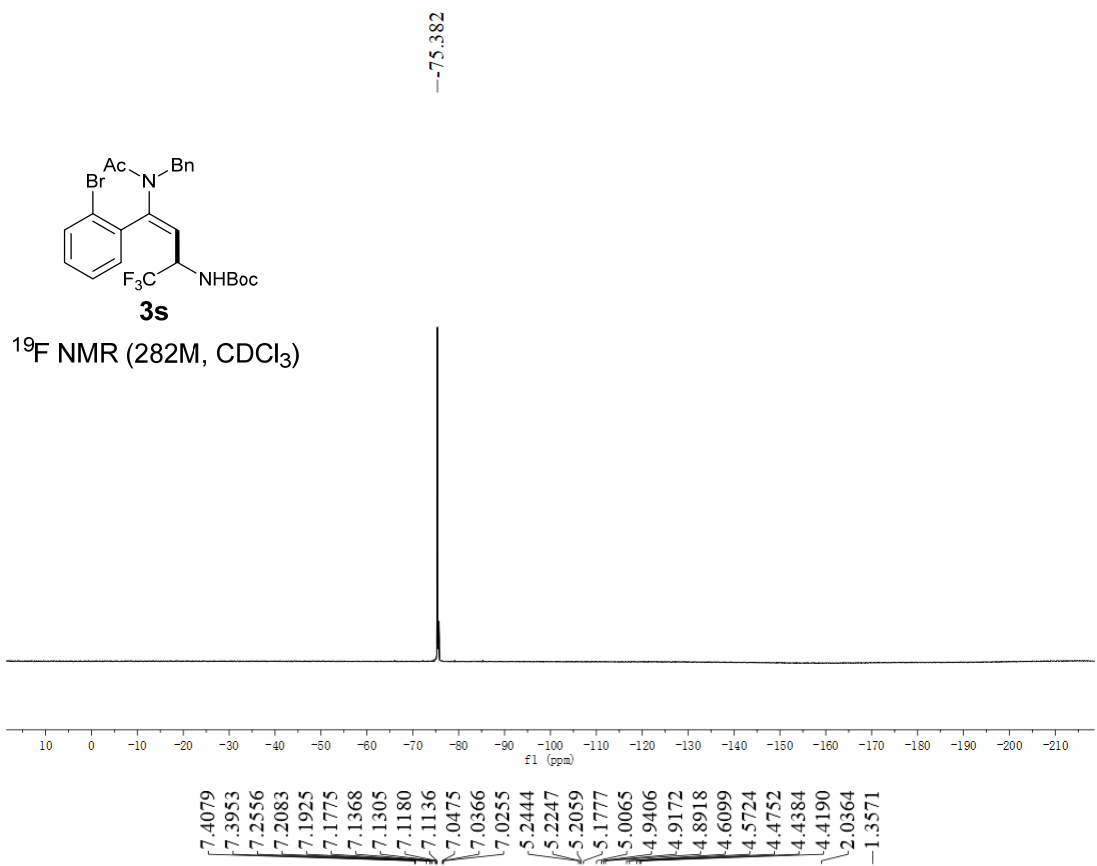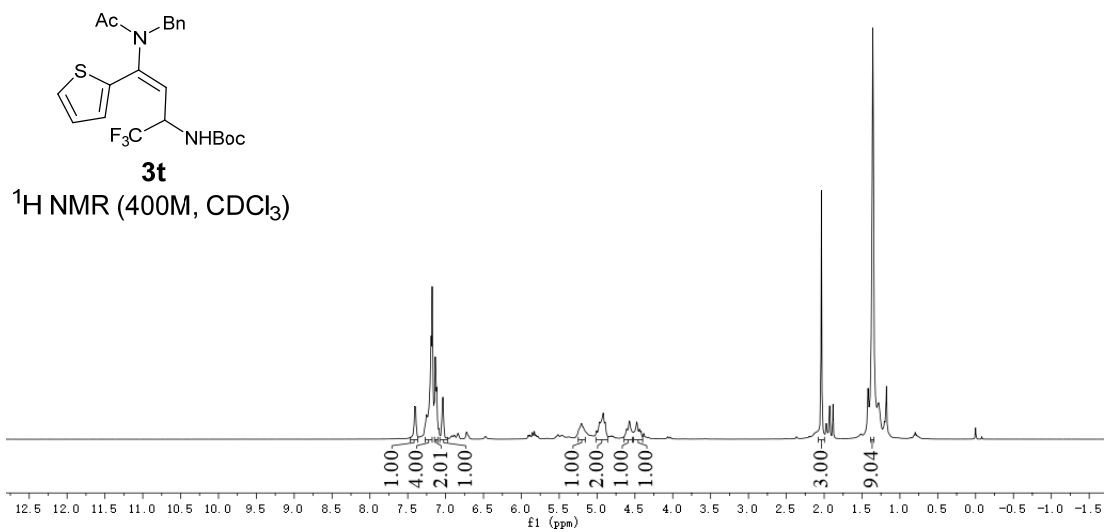

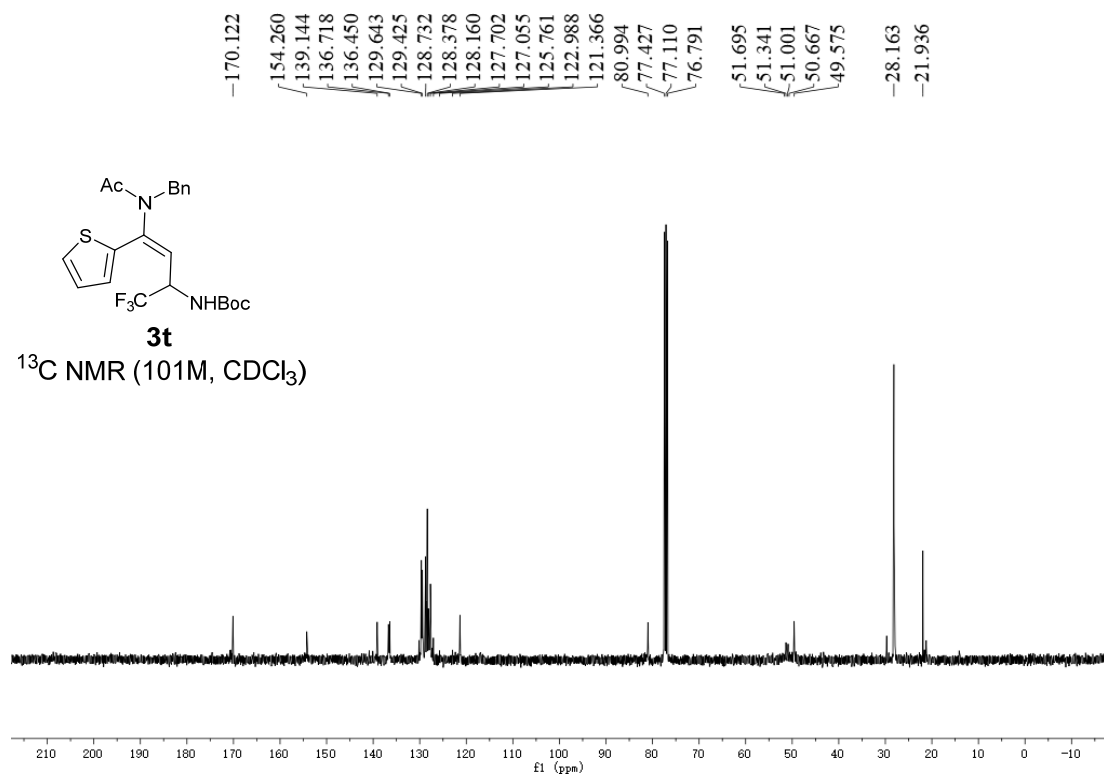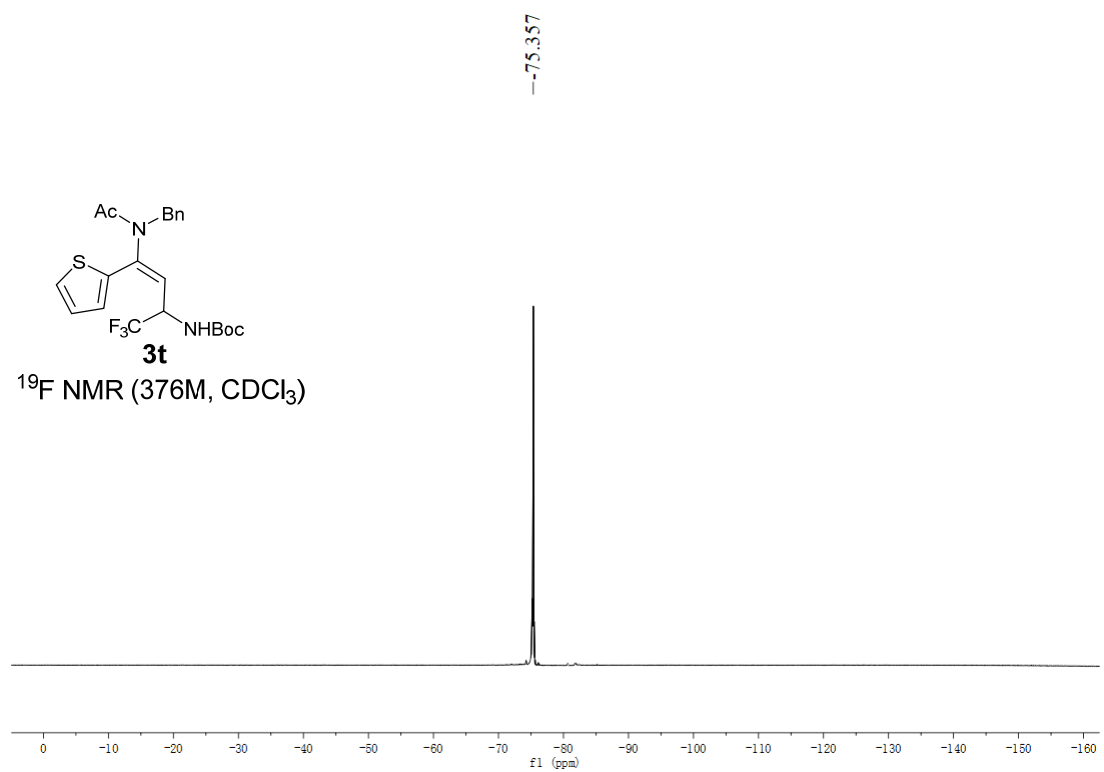

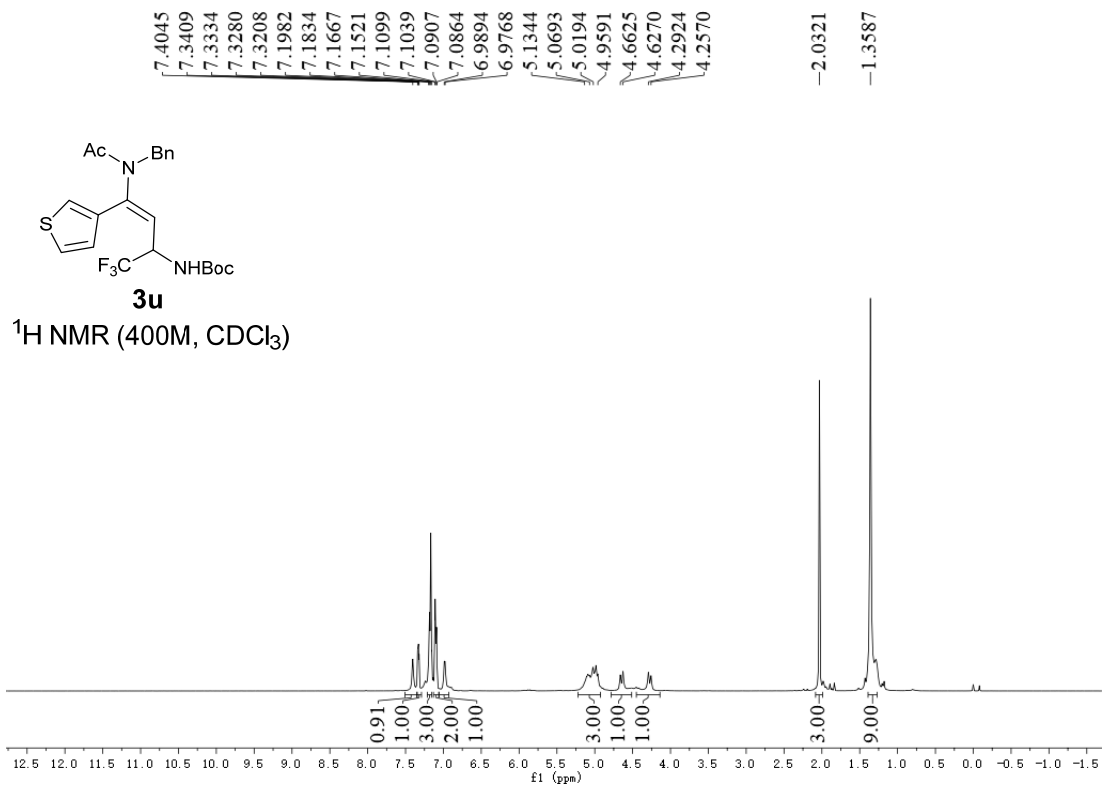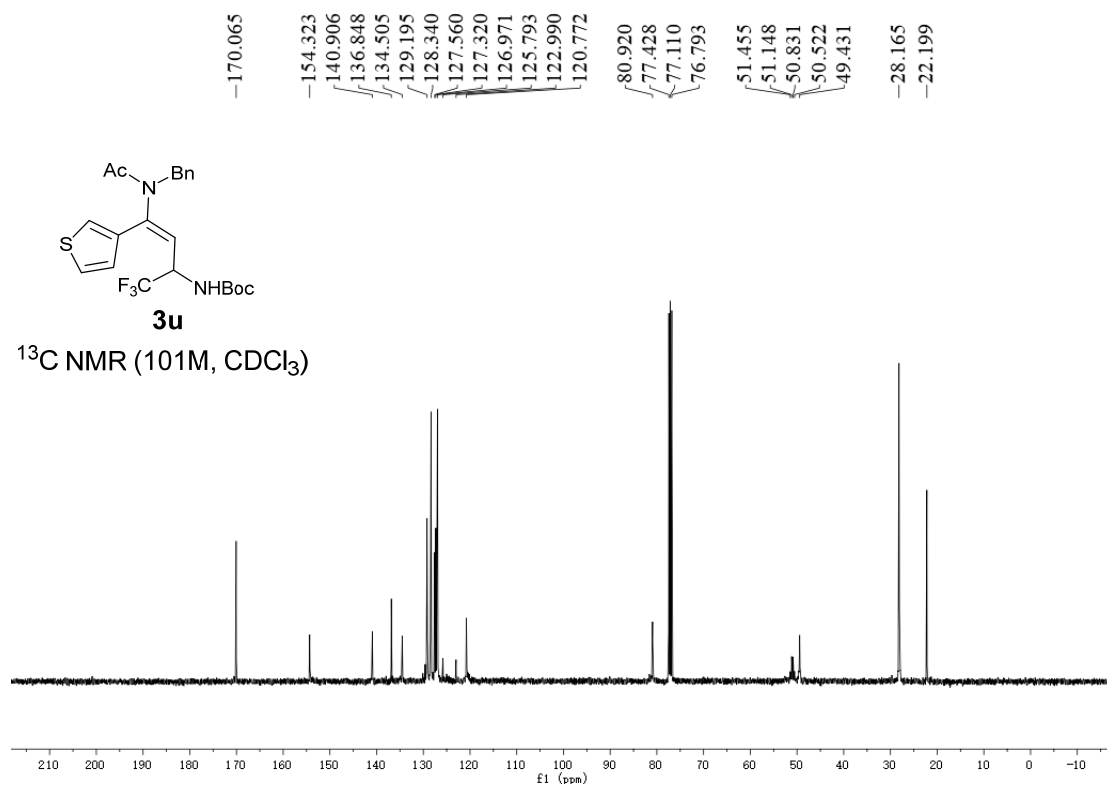

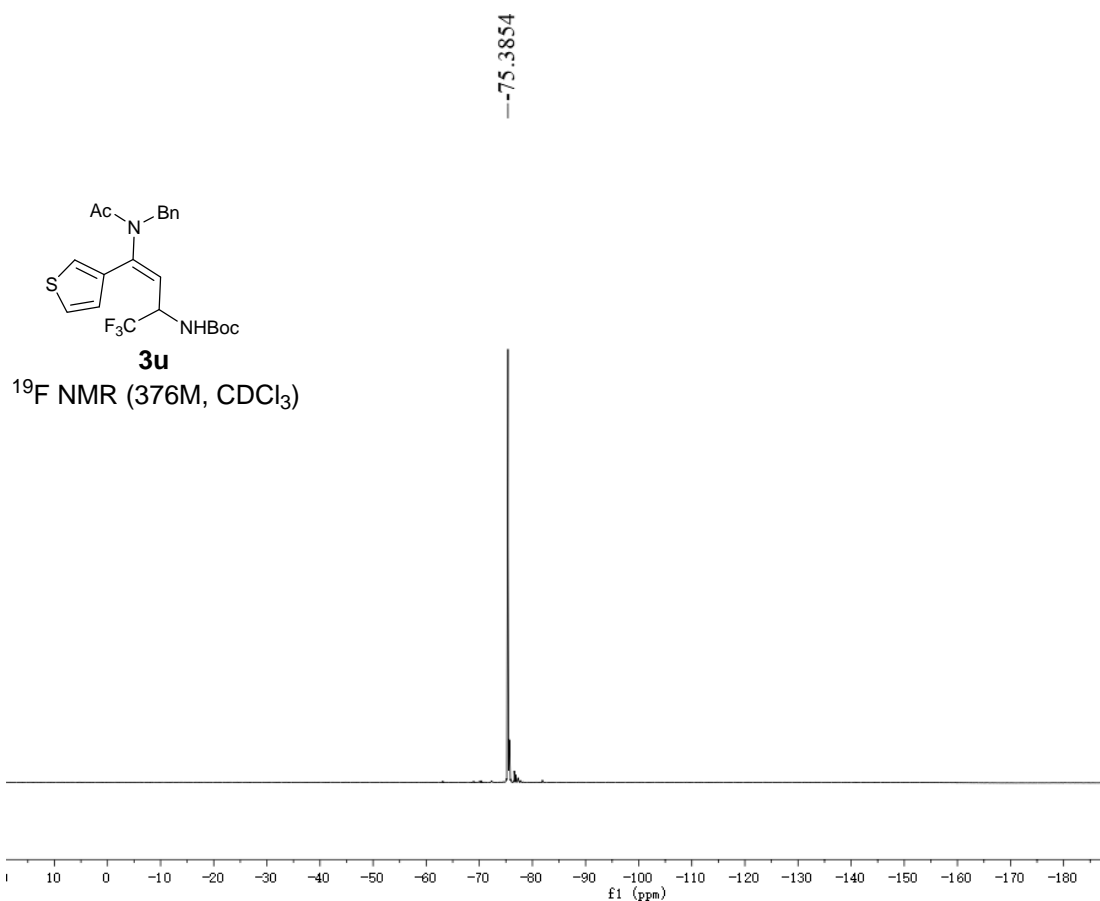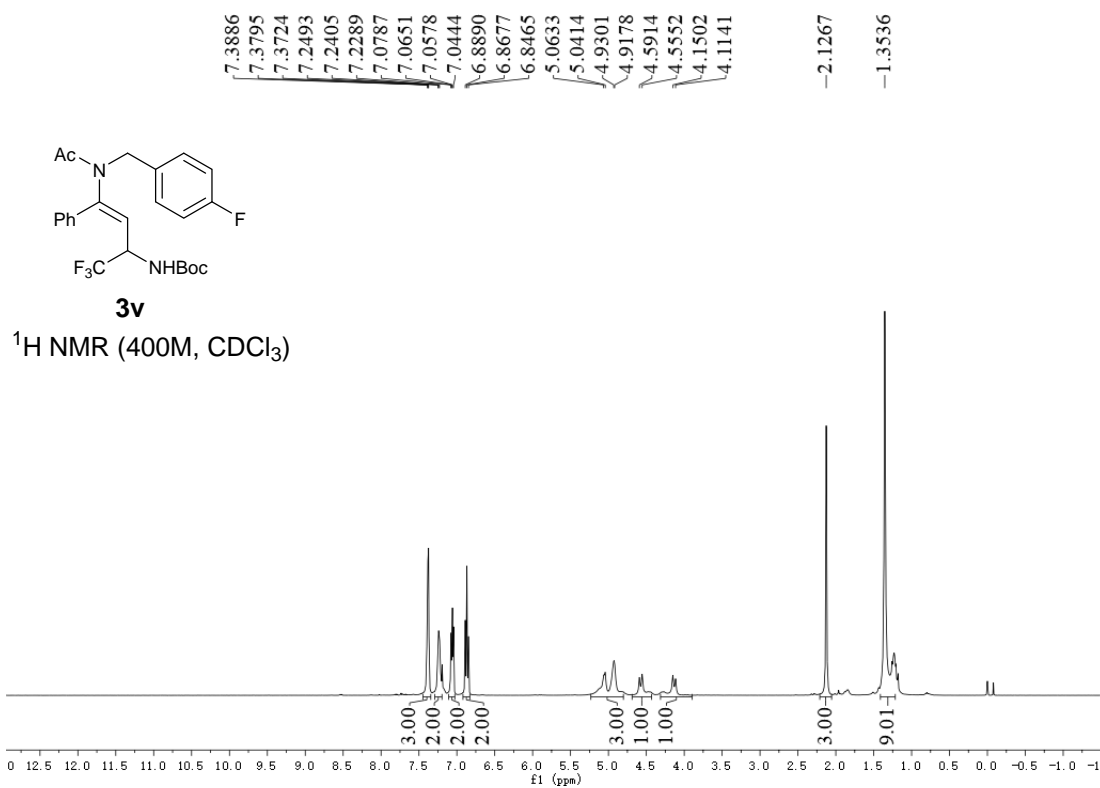

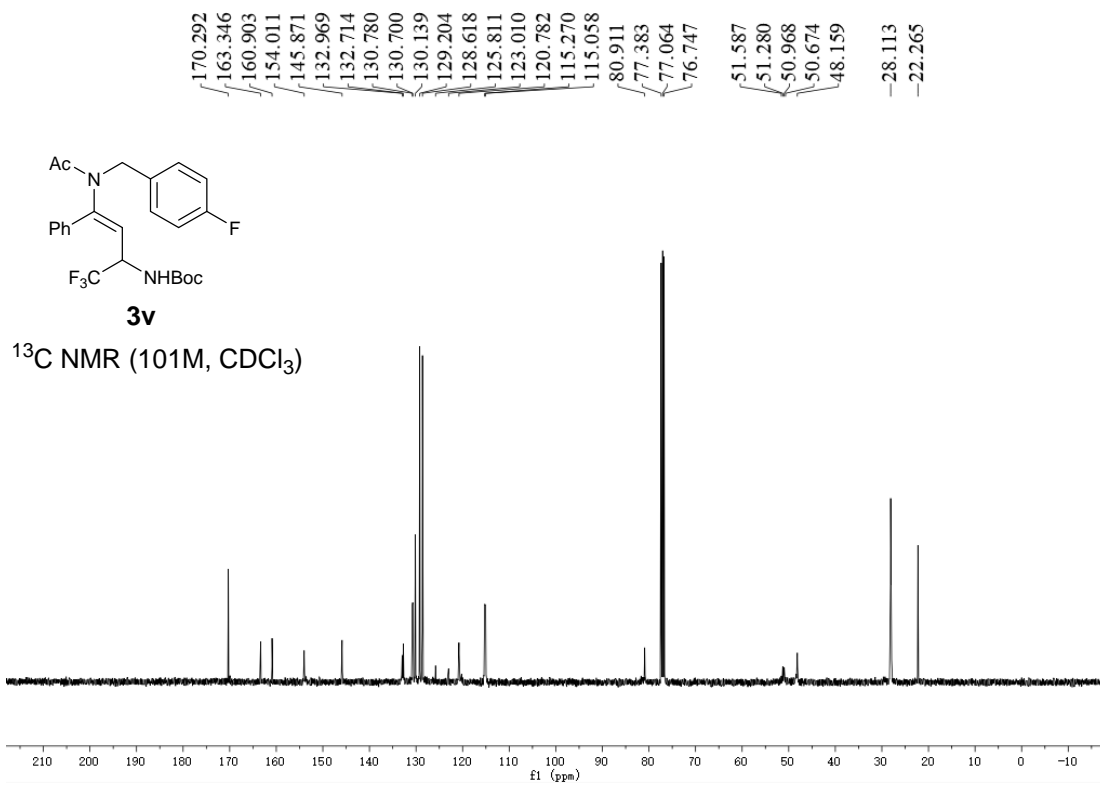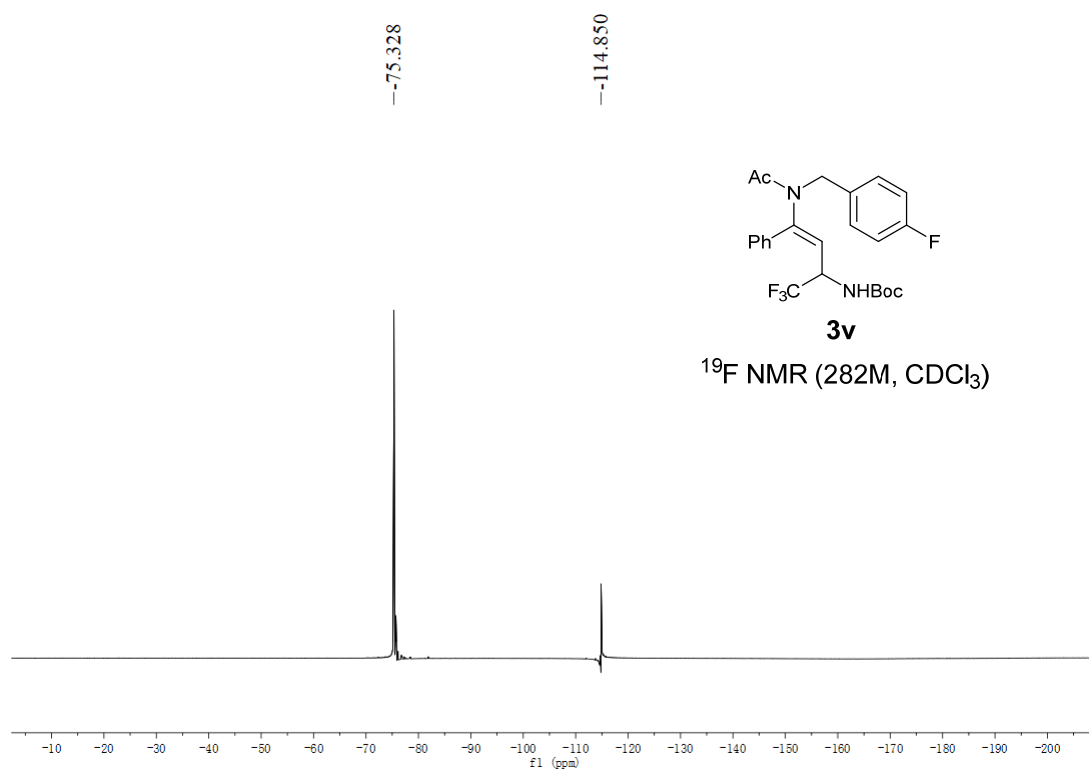

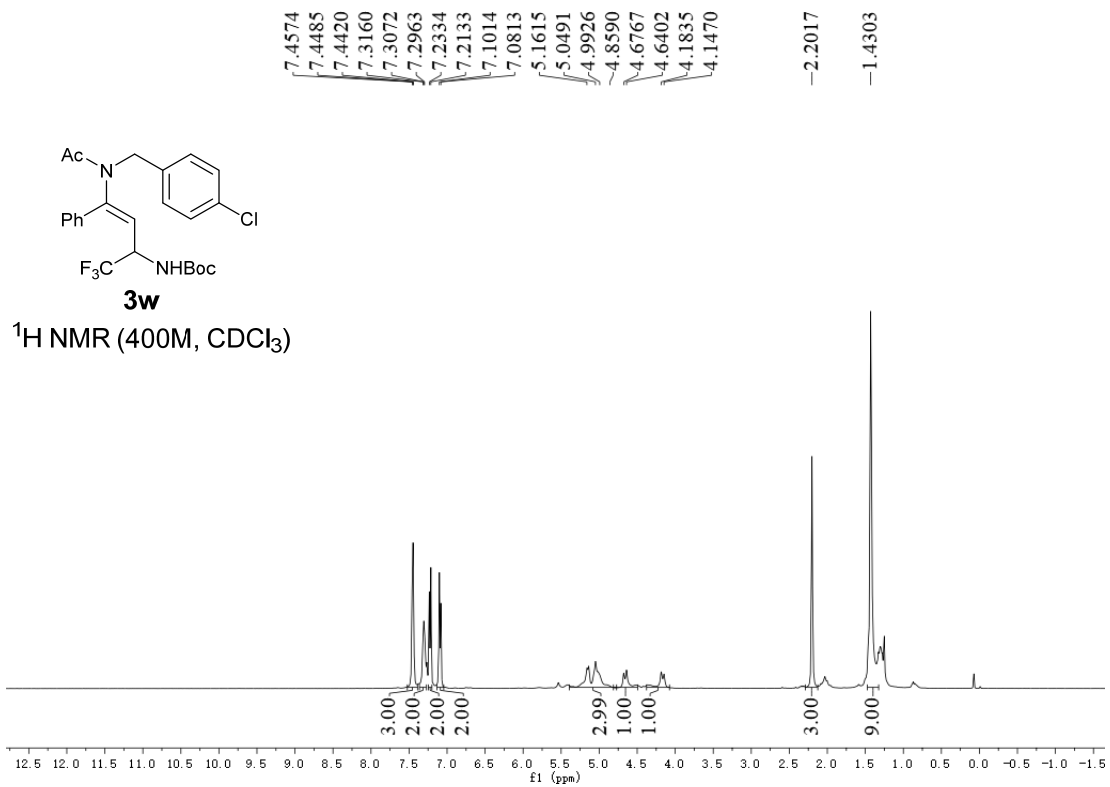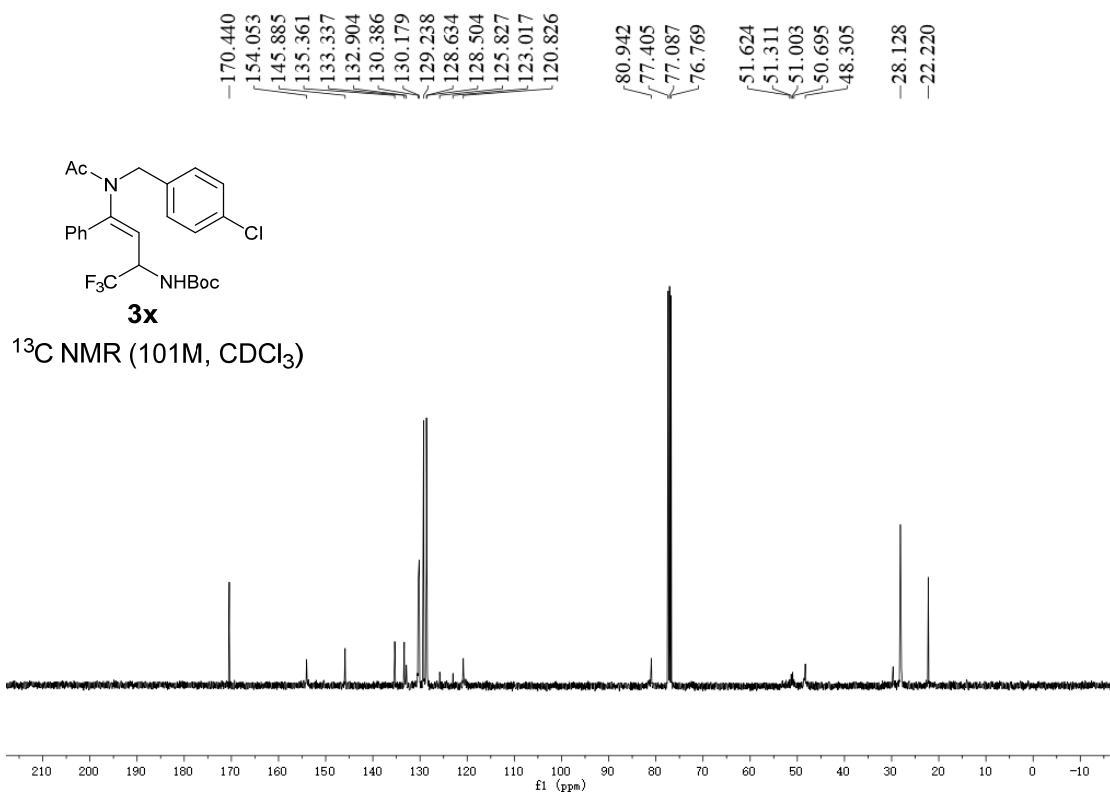



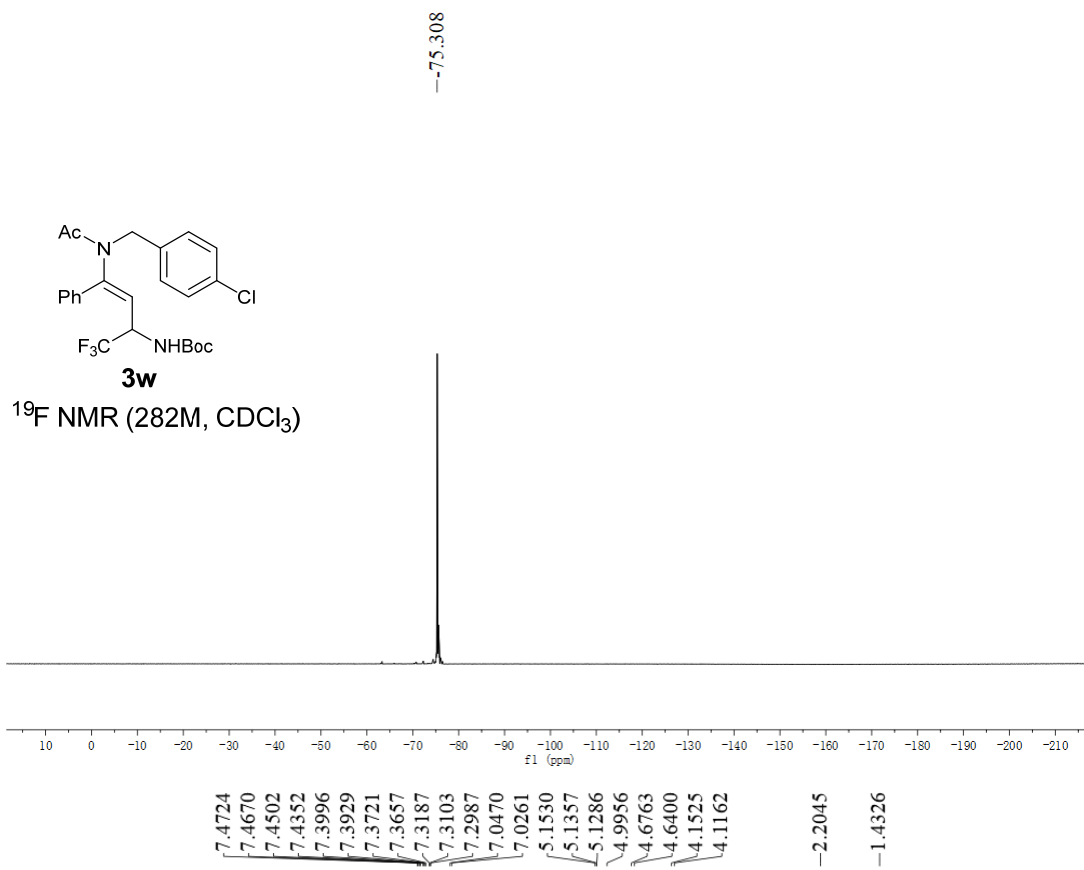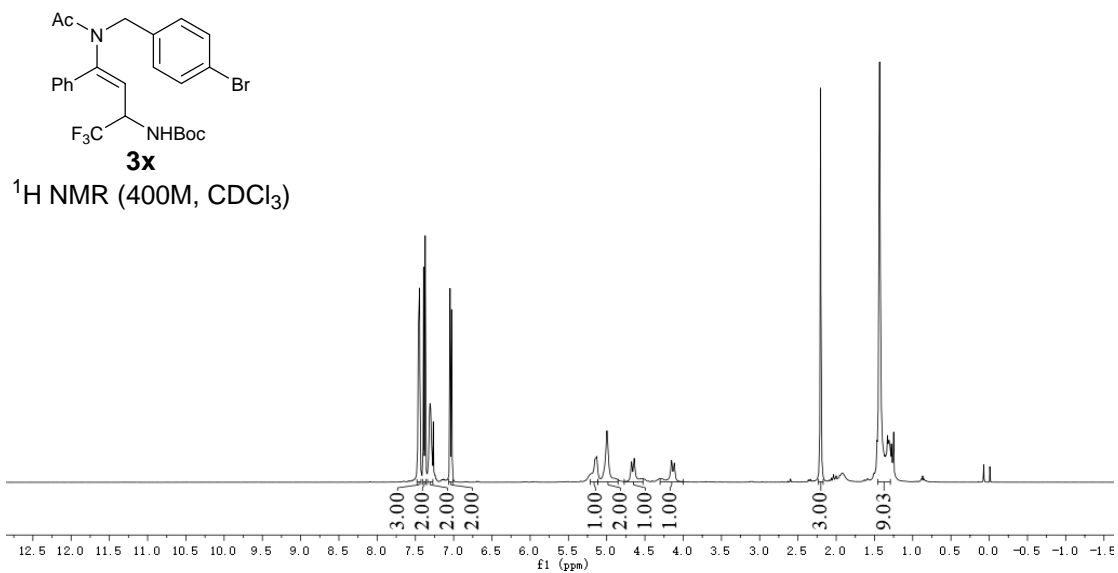

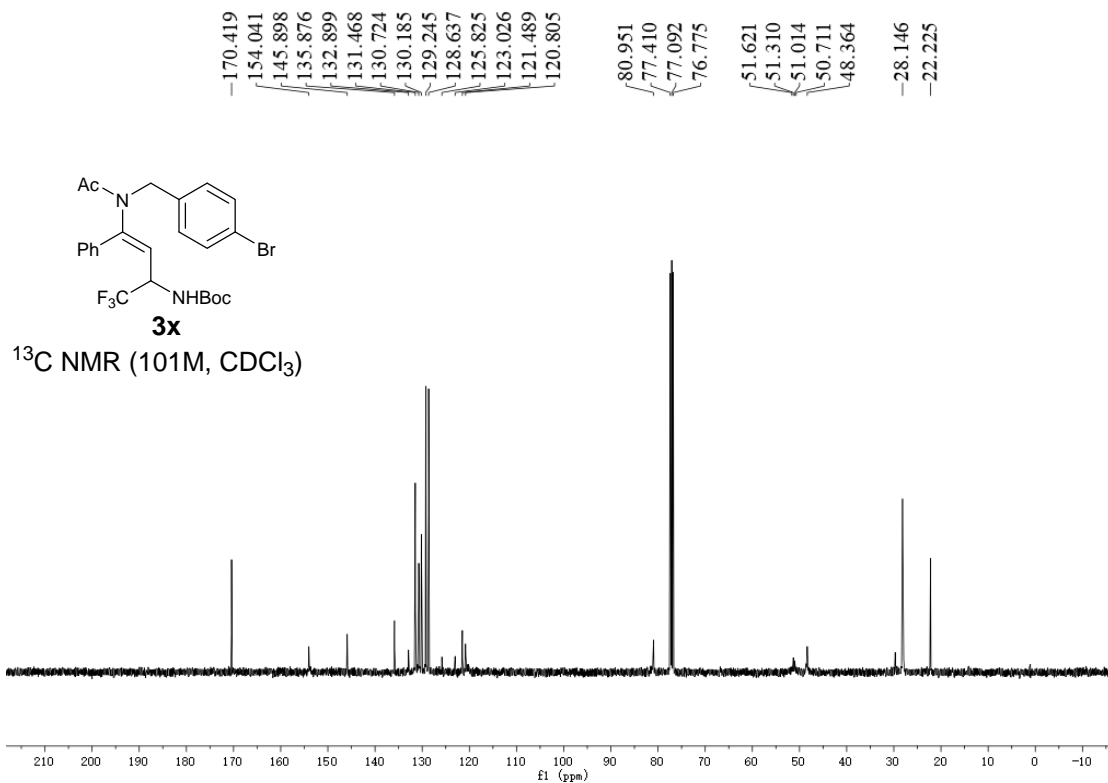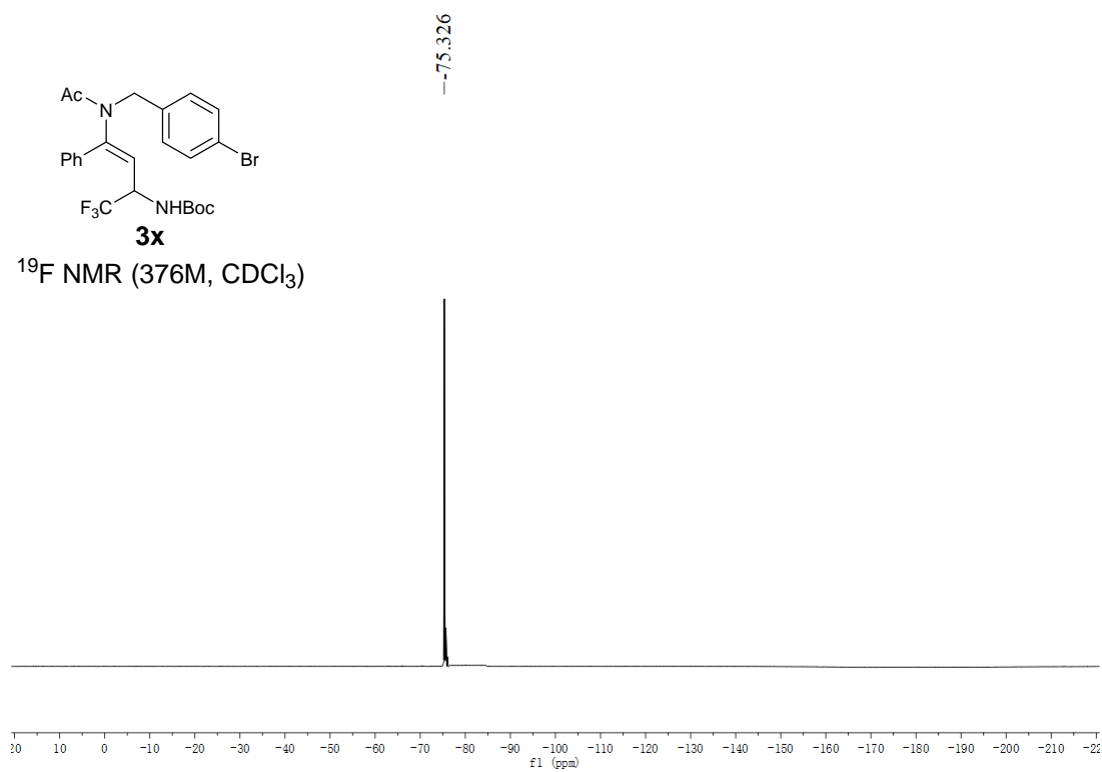

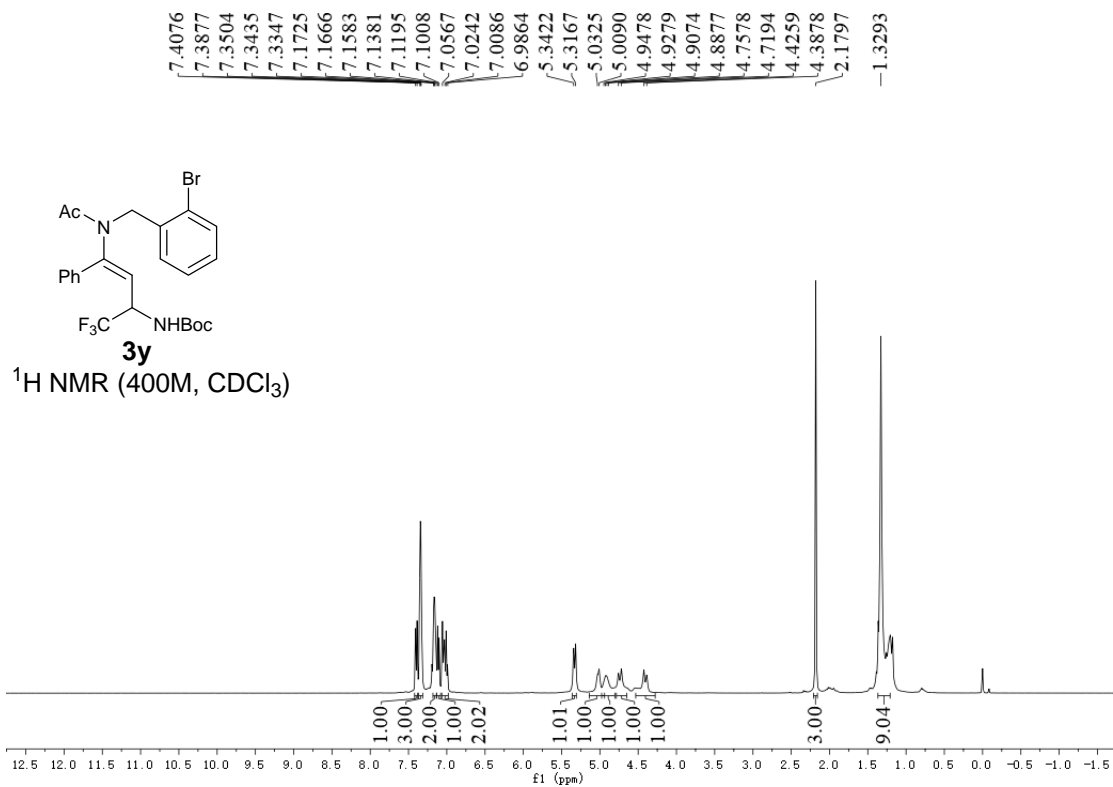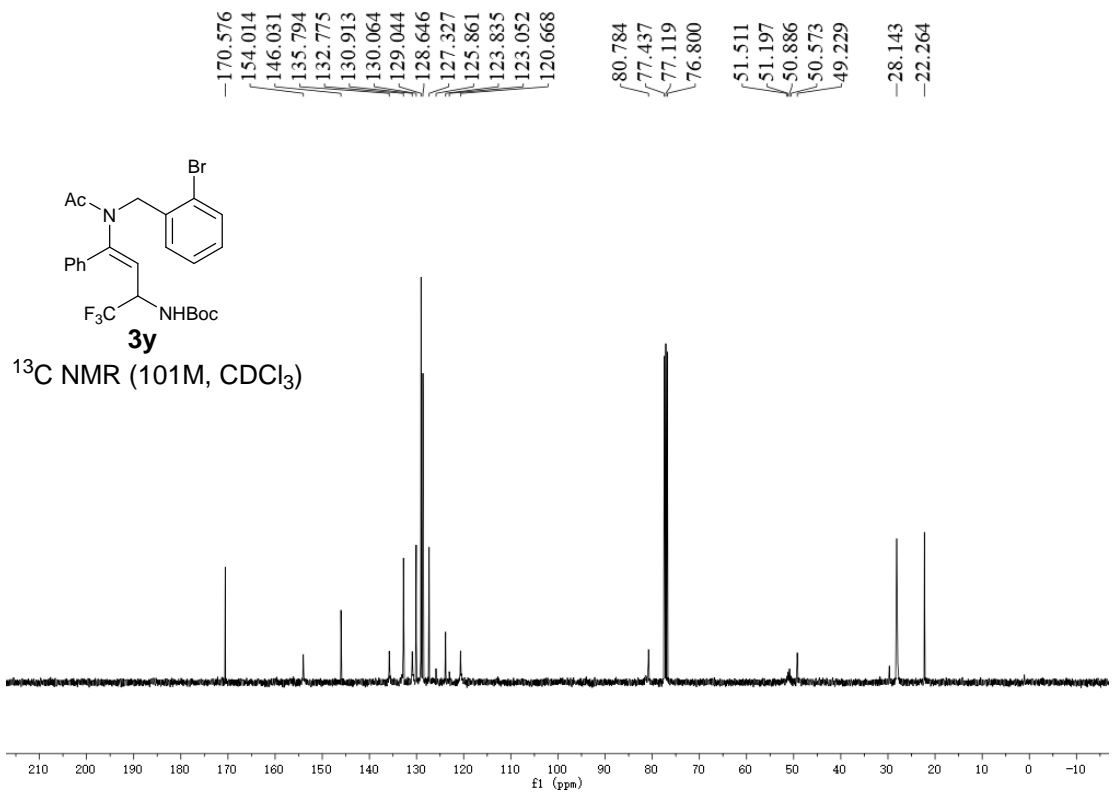

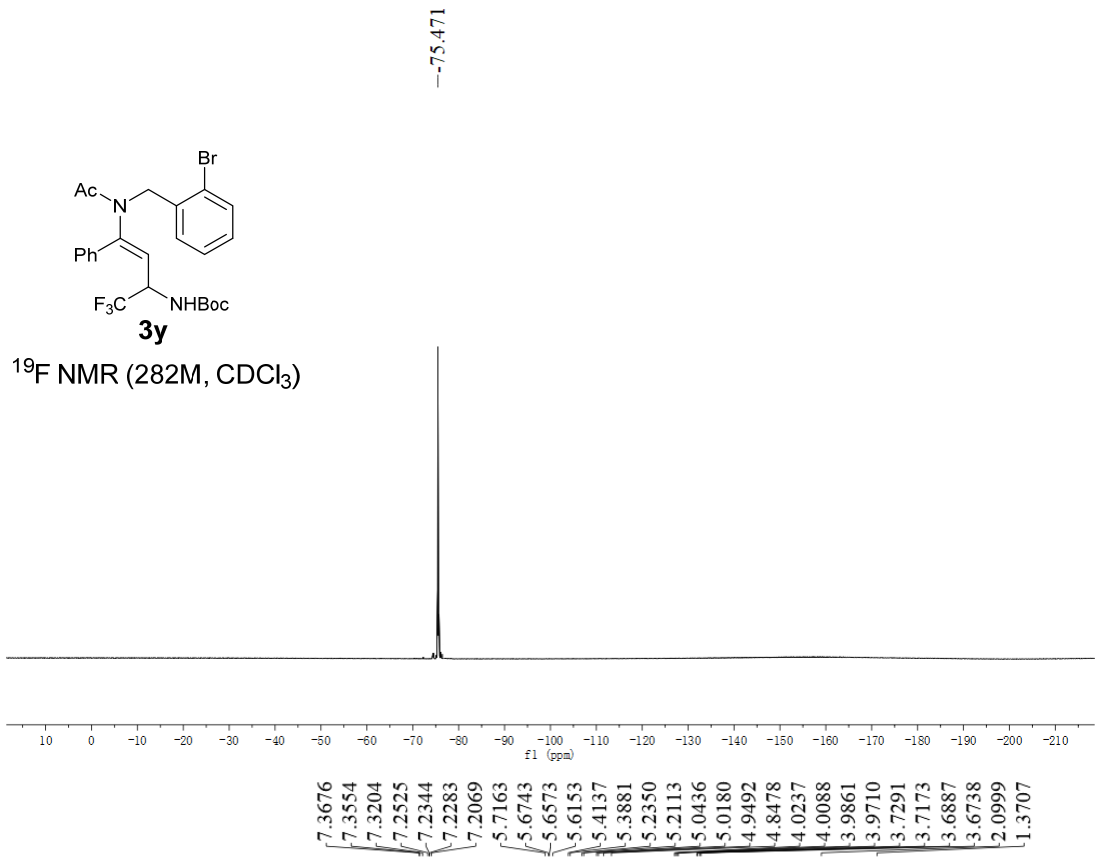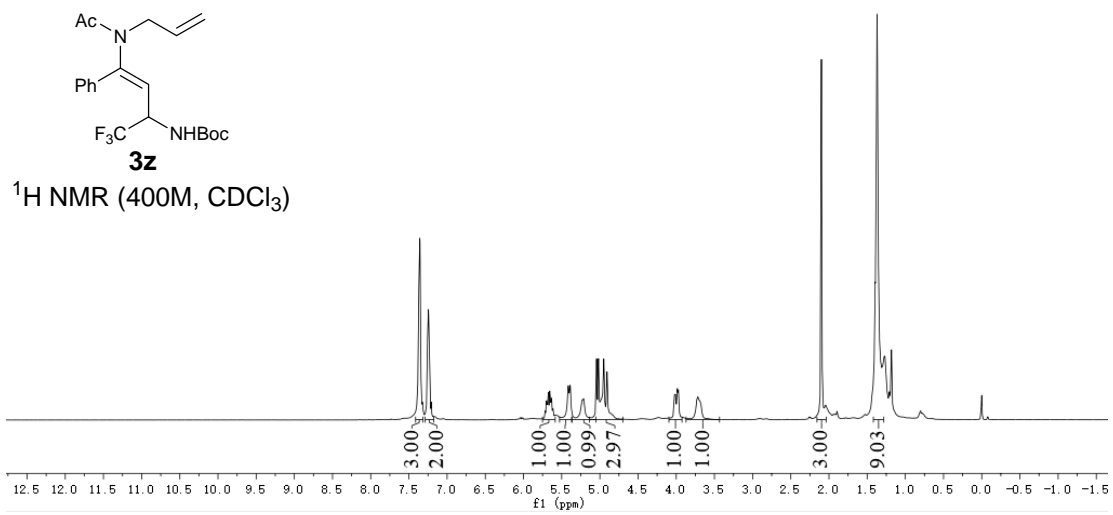

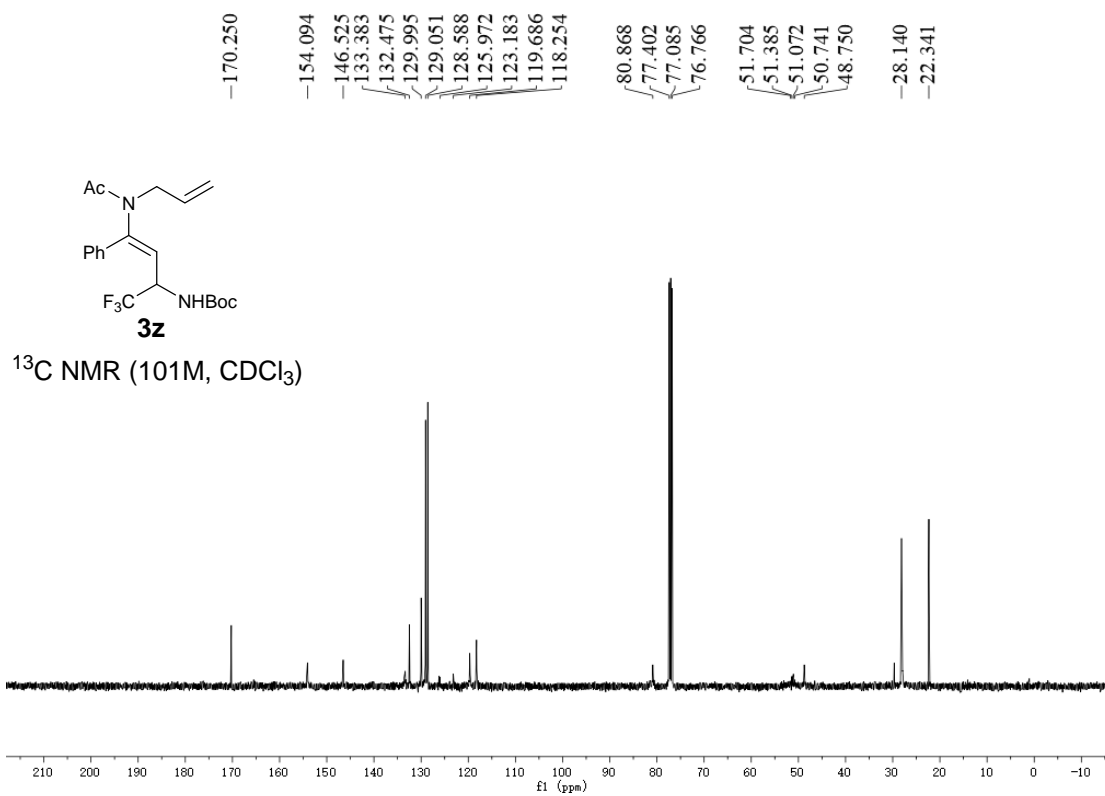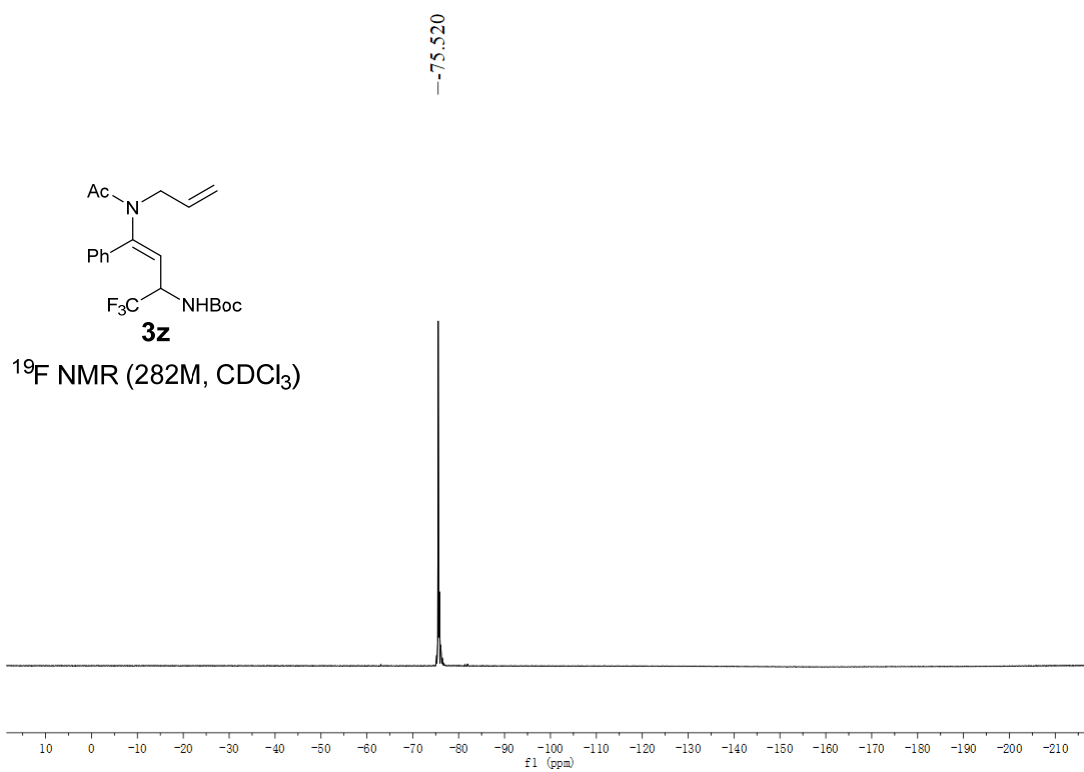

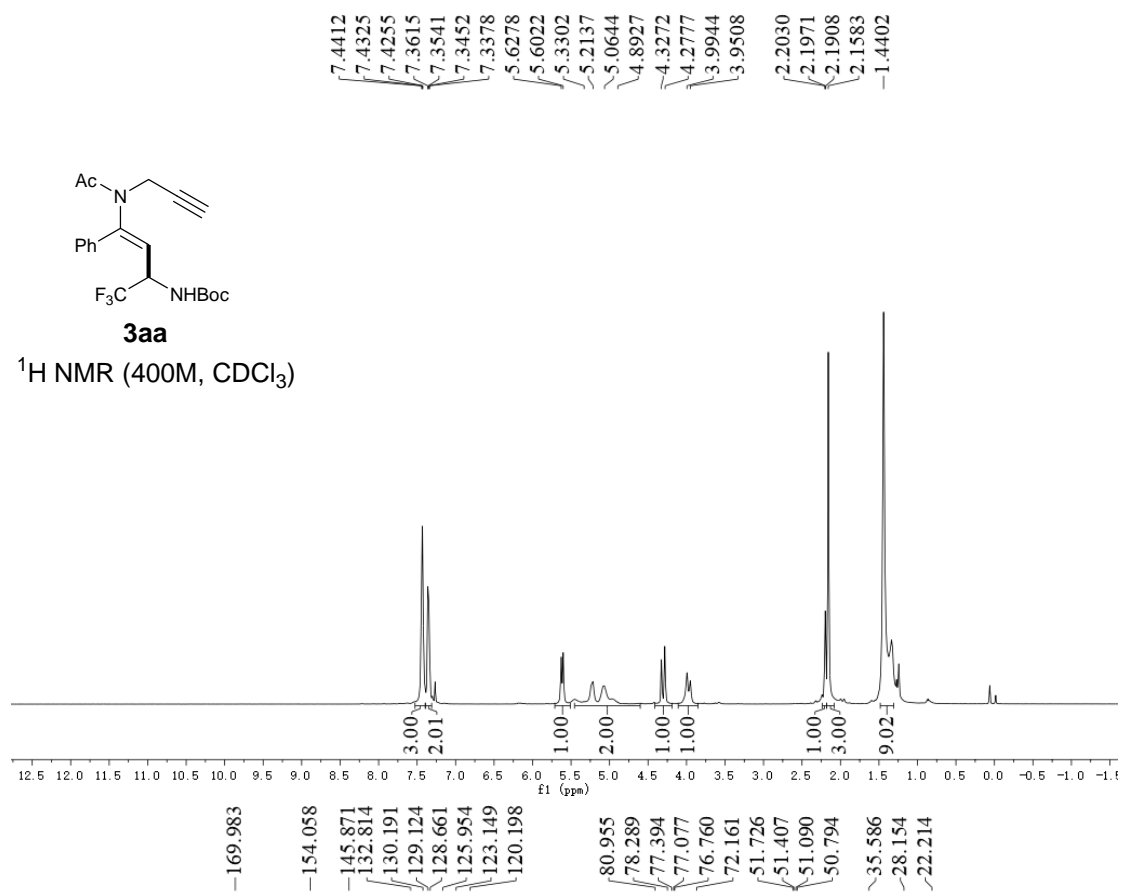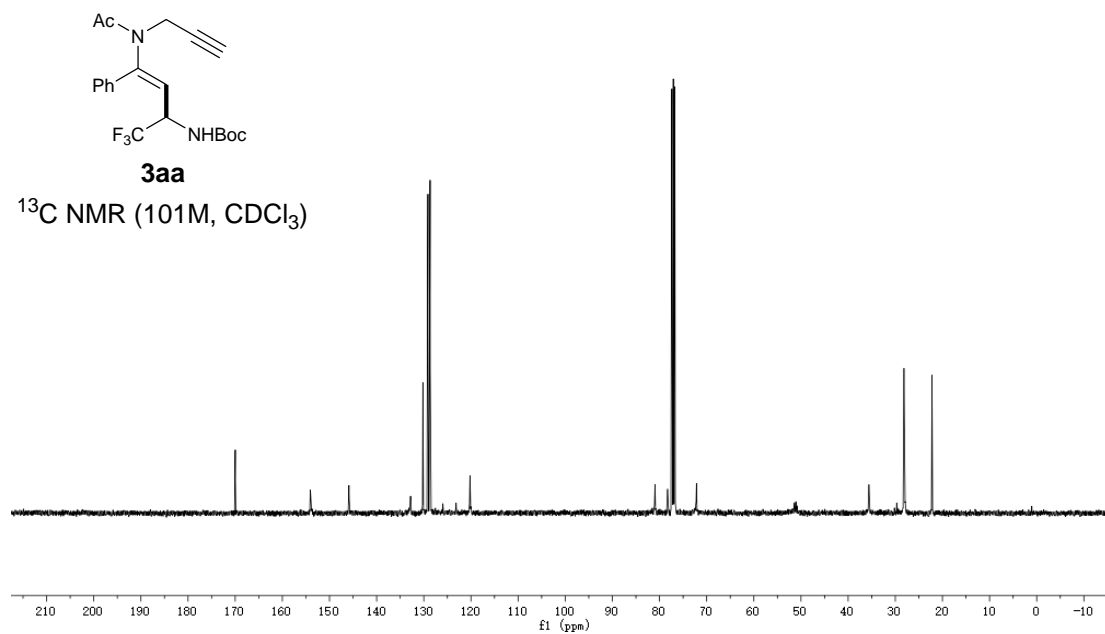

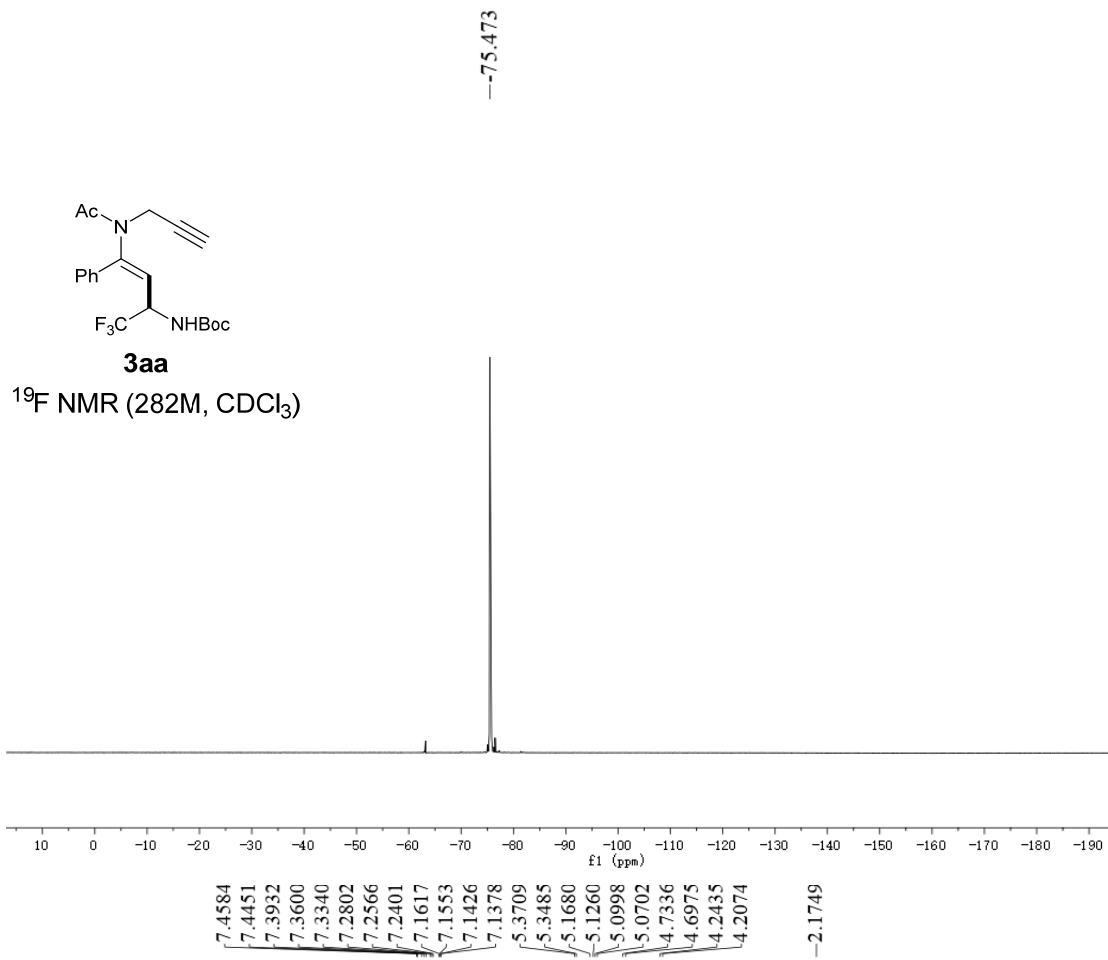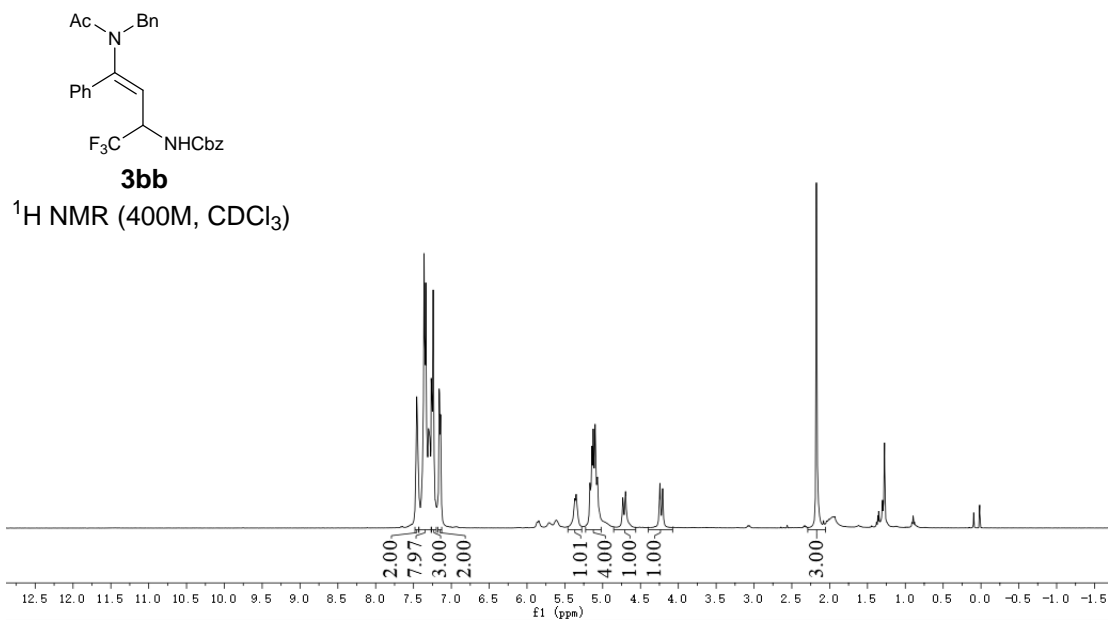

170.432  
154.912  
146.374  
136.753  
135.757  
135.478  
132.976  
130.164  
129.210  
128.942  
128.621  
128.461  
128.375  
128.172  
128.146  
127.537  
125.698  
122.892  
120.062  
77.399  
77.081  
76.764  
67.557  
52.146  
51.824  
51.498  
51.188  
49.067  
-22.264

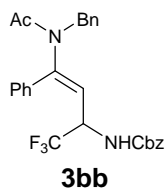

<sup>13</sup>C NMR (101M, CDCl<sub>3</sub>)

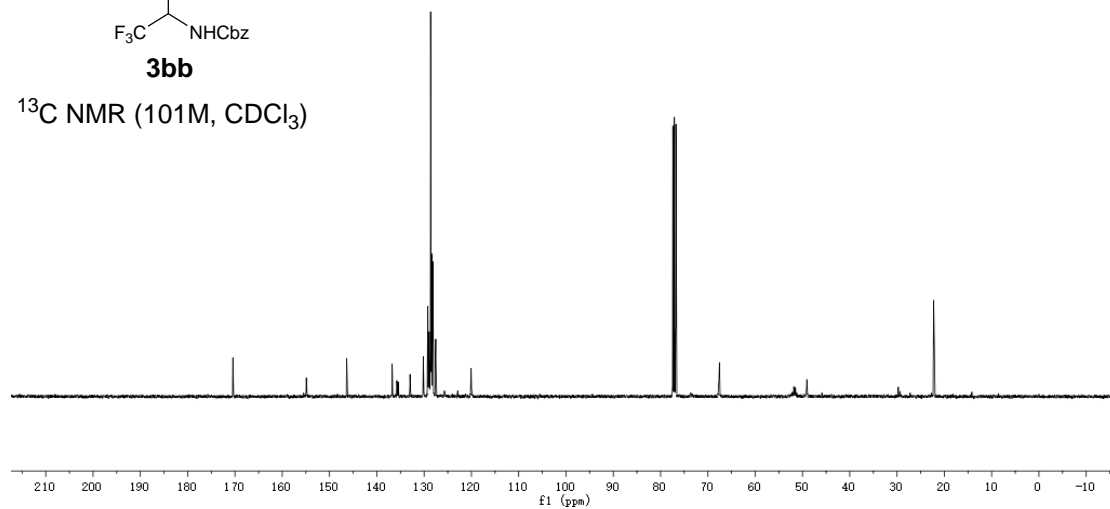

--75.3485

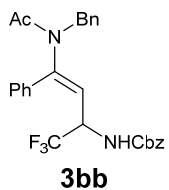

<sup>19</sup>F NMR (282M, CDCl<sub>3</sub>)

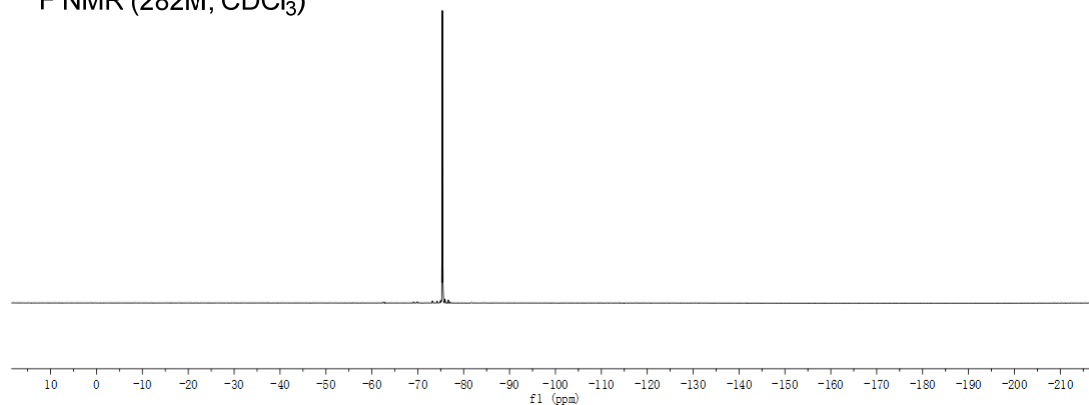



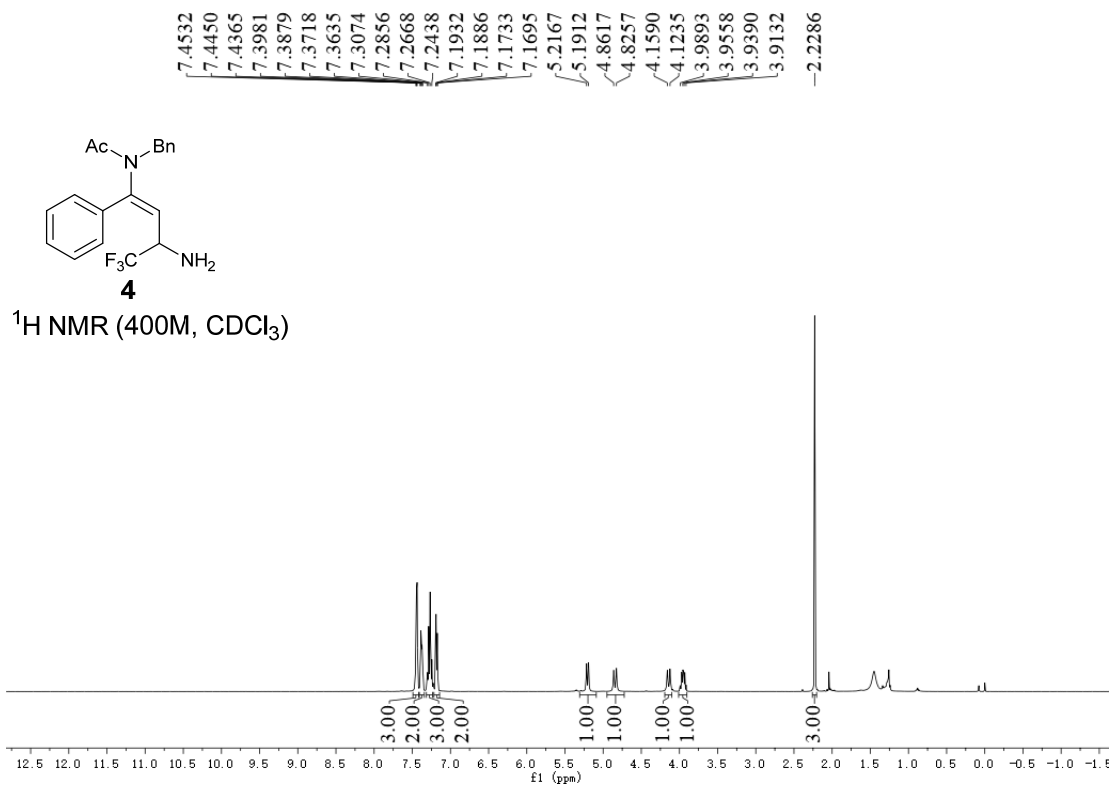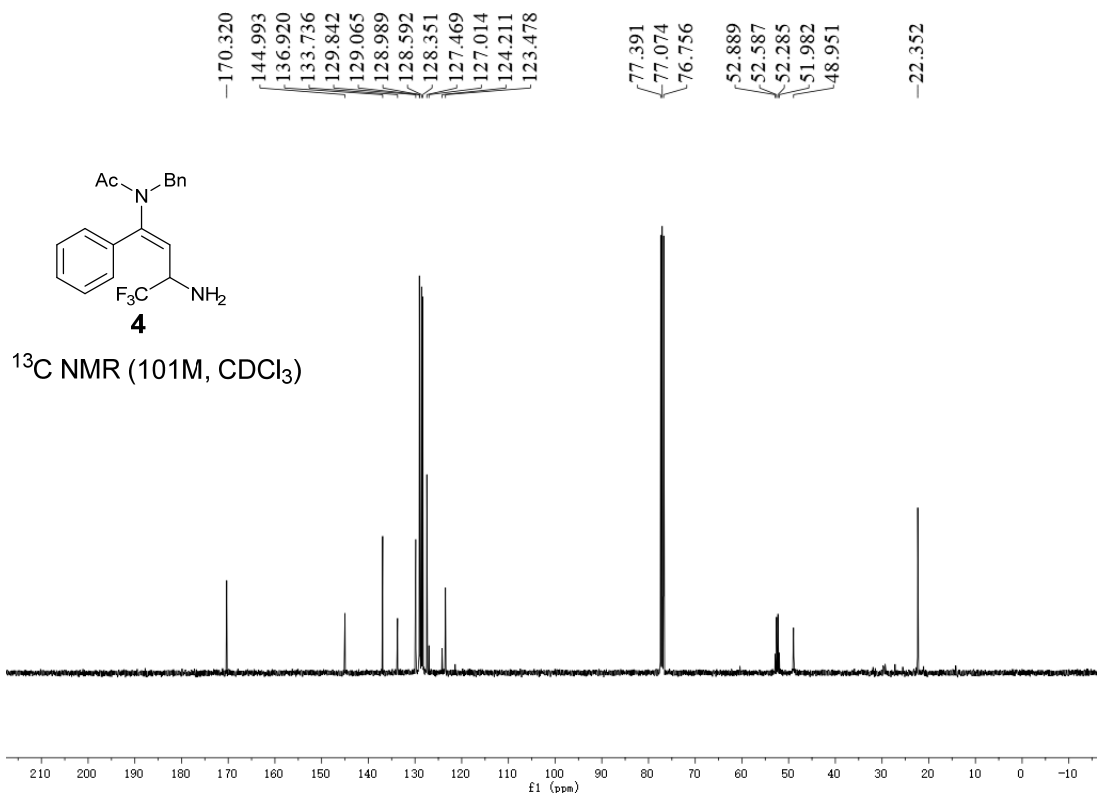

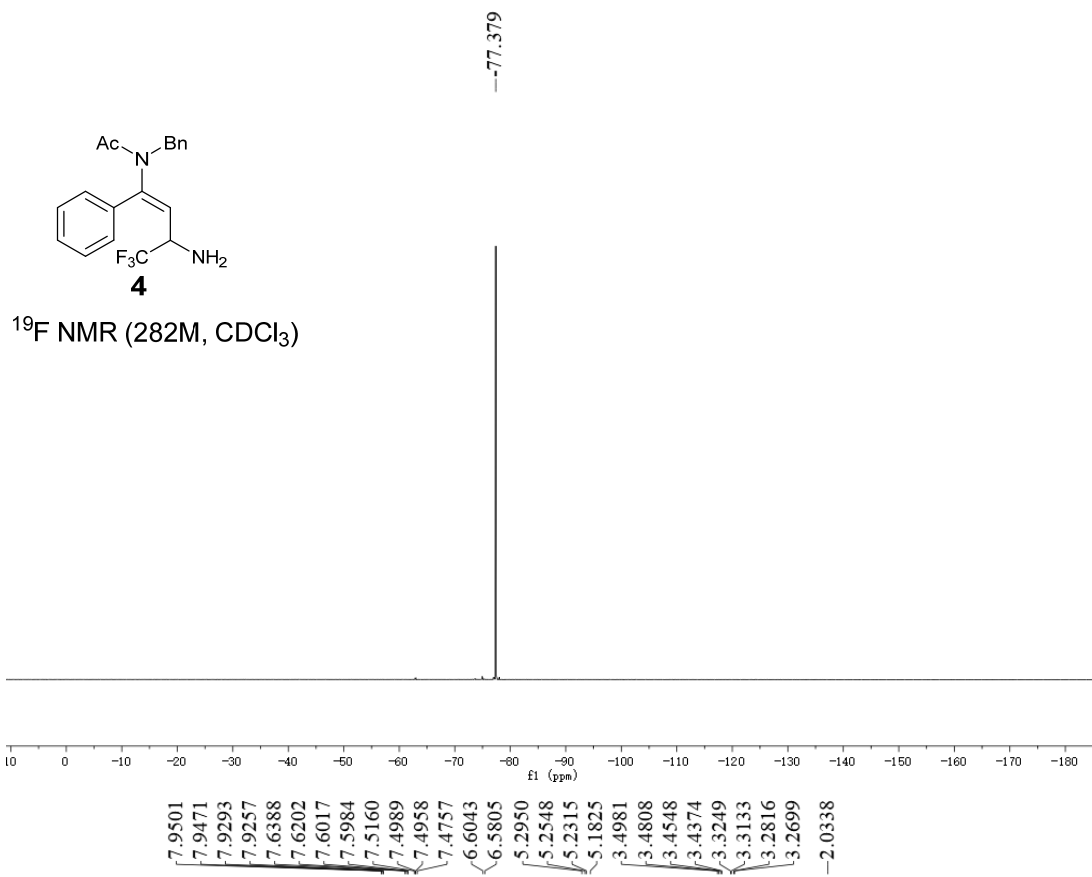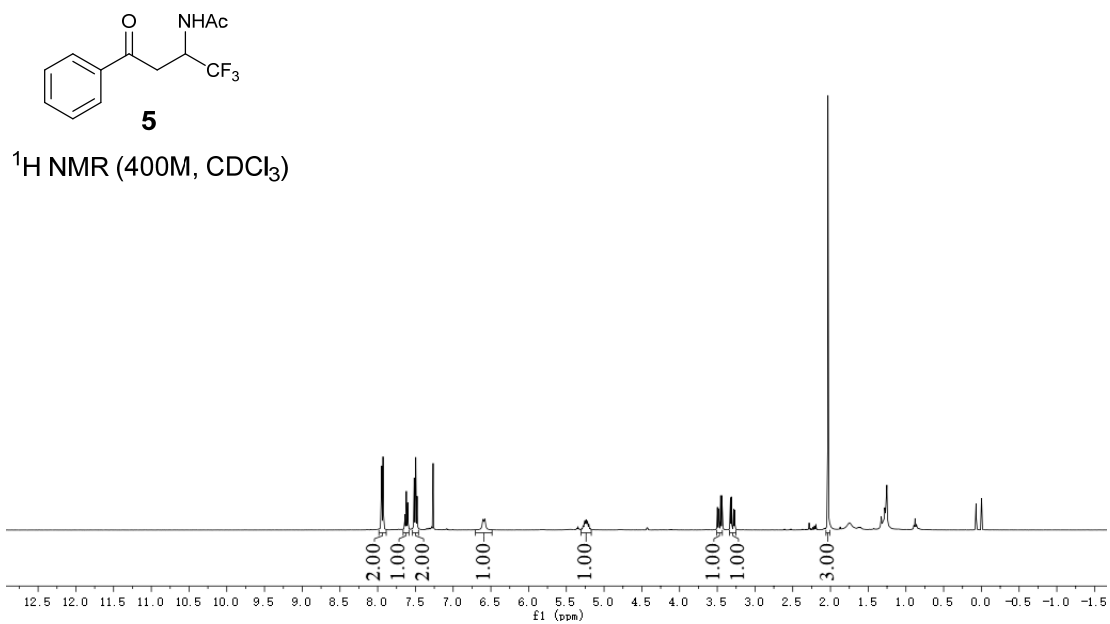

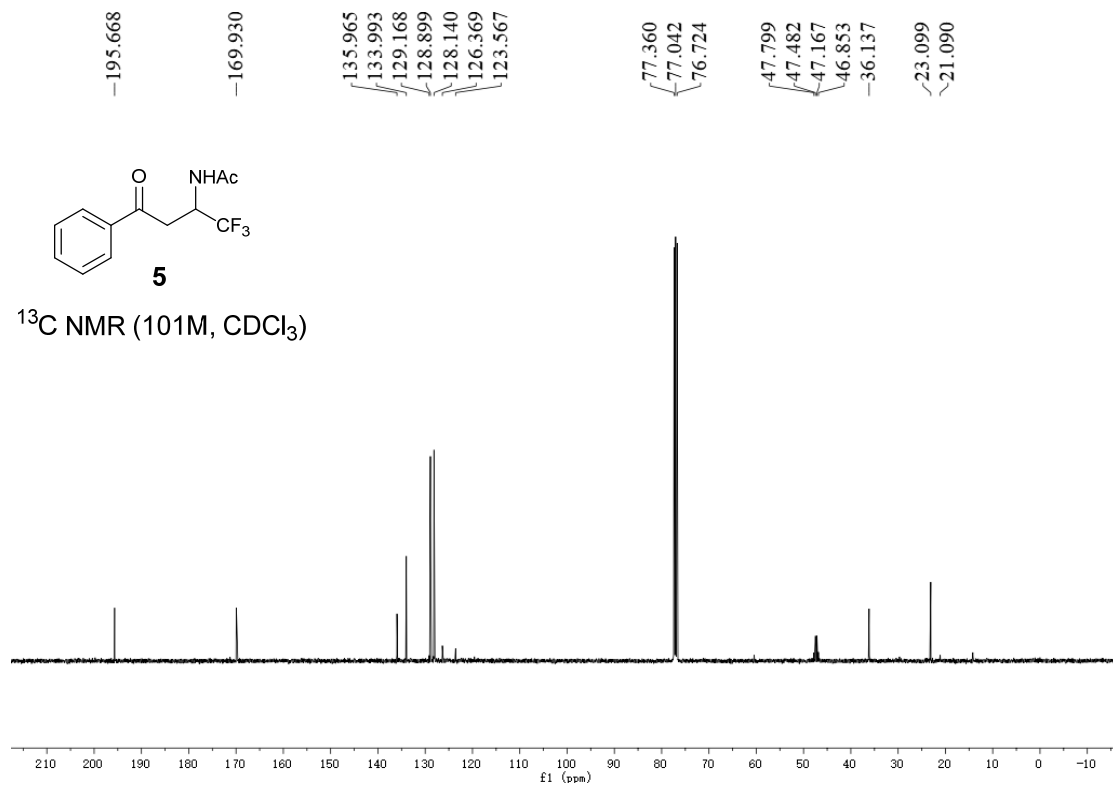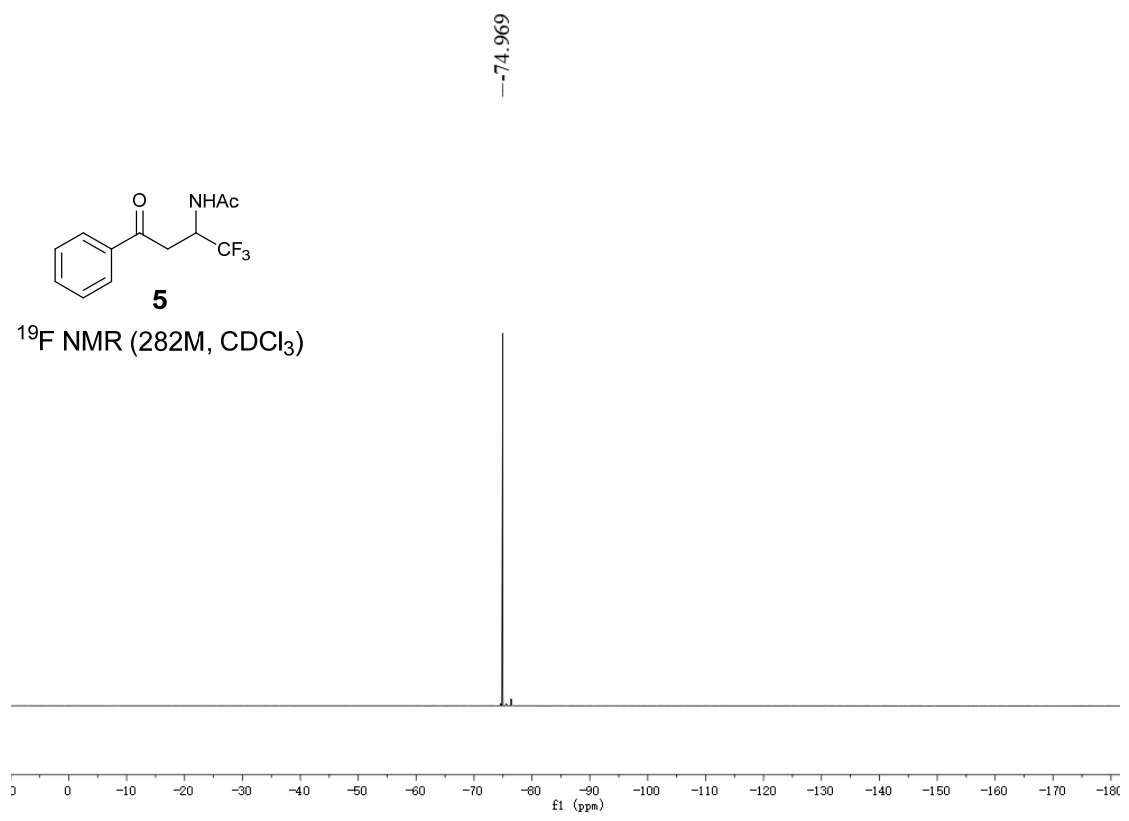

Supplement: d4ob02102a1.pdf [file d4ob02102a1.pdf]
